# Supplementary material
Source: PubMed Central journal article supplement (PMC2837586)

## Supporting information

### Toward Palau' amine; Hg(OTf)<sub>2</sub>-Catalyzed Synthesis of Cyclopentane Core

Kosuke Namba\*, Yukari Kaihara, Hirofumi Yamamoto, Hiroshi Imagawa, Keiji, Tanino, Robert M. Williams, and Mugio Nishizawa\*

*Division of Chemistry, Graduate School of Science, Hokkaido University  
Kita-ku, Sapporo 060-0810 (JAPAN)*

*Fucluty of Pharmaceutical Sciences, Tokushima Bunri University  
180 Nishihama Boji, Yamashiro-cho, Tokushima, 770-8514 (JAPAN)*

*Department of Chemistry, Colorado State University  
Fort Collins, Colorado 80523 (USA)*

*and the University of Colorado Cancer Center Aurora, Colorado 80045 (USA)*

Tel: (+81) 88-602-8446 Fax: (+81) 88-655-3051

E-mail: [namba@mail.sci.hokudai.ac.jp](mailto:namba@mail.sci.hokudai.ac.jp), [mugi@ph.bunri-u.ac.jp](mailto:mugi@ph.bunri-u.ac.jp)

- Experimental Detail S02 - S16
- <sup>1</sup>H NMR and <sup>13</sup>C NMR spectra of each intermediate from **9** to **31**  
and lactone **21** S17 - S53
- X-ray data of **24α** and **32** S54 – S69

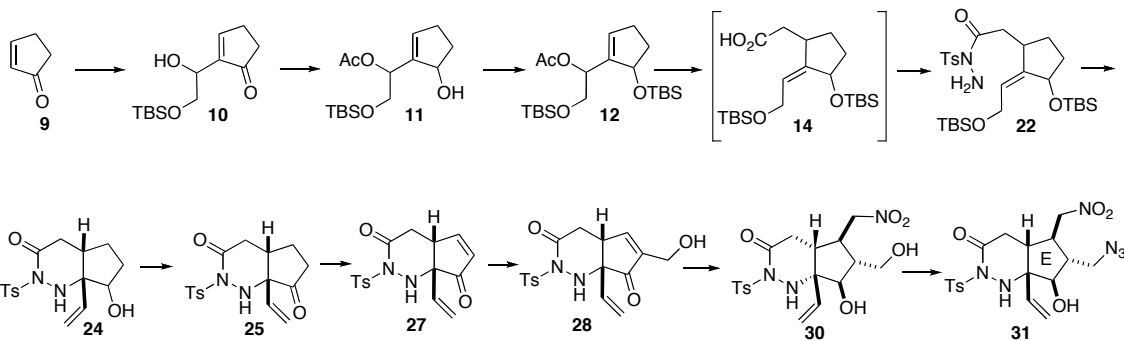

## General Procedures and Methods

FTIR spectra were measured on a JASCO FT/IR-410 infrared spectrophotometer. NMR spectra were recorded on a Varian Mercury plus-300-4N spectrometer. Chemical shifts are reported in parts per million (ppm). For  $^1\text{H}$  NMR spectra ( $\text{CDCl}_3$ ), the residual solvent peak was used as the internal reference (7.24 ppm), whereas the central solvent peak as the reference (77.03 ppm) for  $^{13}\text{C}$  NMR spectra ( $\text{CDCl}_3$ ). Mass spectra were recorded on a JEOL the Mstation JMS-700. Analytical thin layer chromatography (TLC) was performed with E. Merck pre-coated TLC plates, silica gel 60F-254, layer thickness 0.25 mm. Flash chromatography was performed on Kanto Chemical 60 (63-210) mesh silica gel. Reagents and solvents are commercial grade and were used as supplied. Mercury triflate was prepared by the following procedure; to a suspension of  $\text{HgO}$  (541.4 mg, 2.5 mmol) in acetonitrile (5 mL) was dropwise added  $\text{Tf}_2\text{O}$  (705.3 mg, 2.5 mmol) at  $0\text{ }^\circ\text{C}$ , and the mixture was stirred at  $0\text{ }^\circ\text{C}$  until the yellow color disappear. The resulting colorless solution was transferred to 25 mL of messflask and diluted with anhydrous acetonitrile to give 0.1M solution.

### 2-(2-(*tert*-butyldimethylsilyloxy)-1-hydroxyethyl)cyclopent-2-enone (**10**)

To a solution of 2-cyclopentene-1-one **9** (4.71 g, 57.4 mmol) in THF (57 mL) was added (*tert*-Butyldimethylsilyloxy)-acetaldehyde (10.0 g, 57.4 mmol) and *n*-tributylphosphine (1.43 mL, 5.74 mmol). The mixture was stirred for 4 h at room temperature and concentrated under reduced pressure. The residue was purified by flash column chromatography on silica gel (elution with hexane/ethyl acetate = 4/1 to 2/1) to give **10** (10.3 g, 70%) as colorless amorphous. IR (neat) 3444, 2928, 2857, 1698, 1252, 1120,  $\text{cm}^{-1}$ ;  $^1\text{H}$  NMR (400 MHz,  $\text{CDCl}_3$ )  $\delta$  7.63 (td,  $J = 2.8, 1.6$  Hz, 1H), 4.48-4.55 (m, 1H), 3.84 (dd,  $J = 10.0, 3.6$  Hz, 1H), 3.52 (dd,  $J = 10.0, 6.4$  Hz, 1H), 3.11 (d,  $J = 4.8$  Hz, 1H), 2.58-2.68 (m, 2H), 2.41-2.47 (m, 2H), 0.89 (s, 9H), 0.06 (s, 3H), 0.05 (s, 3H);  $^{13}\text{C}$  NMR (100 MHz,  $\text{CDCl}_3$ )  $\delta$  208.8, 159.9, 145.1, 68.3, 65.7, 35.2, 26.8, 25.8, 18.2, -5.4, -5.5; HRMS (CI)  $m/z$   $[\text{M}+\text{H}]^+$  calcd for  $[\text{C}_{13}\text{H}_{24}\text{O}_3\text{Si}+\text{H}]^+$  257.1573, found 257.1575.

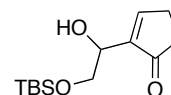

**2-(*tert*-butyldimethylsilyloxy)-1-(5-hydroxycyclopent-1-enyl)ethyl acetate (**11**)**

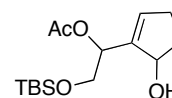

To a solution of **10** (4.0 g, 15.6 mmol) in pyridine (15 mL) was added acetic anhydride (7.37 mL, 78 mmol) at 0 °C. The mixture was stirred for 15 h at 0 °C and concentrated under reduced pressure. The residue was subjected to short-pass flash chromatography on silica gel (elution with hexane/ethyl acetate = 20/1 to 4/1) to give crude acetylated **11** which was used without further purification. To a solution of crude acetylated **11** in methanol (67 mL) was added NaBH<sub>4</sub> (1.0 g, 26.7 mmol) at -20 °C. The mixture was stirred for 1 h, quenched with saturated NH<sub>4</sub>Cl (20 mL), and extracted with diethyl ether (40 mL x 3). The combined organic layers were washed with brine, dried over anhydrous MgSO<sub>4</sub>, filtered, concentrated under reduced pressure. The residue was purified by flash column chromatography on silica gel (elution with hexane/ethyl acetate = 6/1) to give **11** (2.56 g, 55%) as colorless oil (1.5 : 1 diastereomeric mixture). IR (neat) 3452, 2930, 1740, 1372, 1254, cm<sup>-1</sup>; <sup>1</sup>H NMR (300 MHz, CDCl<sub>3</sub>) δ 5.80 (br s, 1Ha+1Hb), 5.42 (t, *J* = 4.5 Hz, 1Ha), 5.36 (t, *J* = 5.7 Hz, 1Hb), 4.69 (br s, 1Ha), 4.67 (br s, 1 Hb), 3.79 (dd, *J* = 11.4, 3.9 Hz, 1Ha), 3.78 (d, *J* = 5.7 Hz, 2Hb), 3.71 (dd, *J* = 11.4, 4.8 Hz, 1Ha), 3.50 (br s, 1Ha), 3.11 (br s, 1Hb), 2.32-2.50 (m, 1Ha + 1Hb), 2.04-2.24 (m, 2Ha + 2Hb), 2.01 (s, 3Hb), 2.00 (s, 3Ha), 1.64-1.82 (m, 1Ha + 1Hb), 0.82 (s, 9Ha + 9Hb), 0.01 (s, 6Ha + 6Hb); <sup>13</sup>C NMR (75 MHz, CDCl<sub>3</sub>) δ 142.7, 142.4, 133.2, 131.8, 76.6, 75.6, 72.6, 71.9, 64.7, 64.4, 33.3, 33.0, 29.9(x2), 25.7(x2), 21.1, 21.0, 18.2, 18.1, -5.4, -5.5; HRMS (CI) *m/z* [M-H]<sup>-</sup> calcd for [C<sub>15</sub>H<sub>28</sub>O<sub>4</sub>Si-H]<sup>-</sup> 299.1678, found 299.1679.

The modified condition was found after the above examination. However, a large scales synthesis of modified condition was not tried, because the sufficient amount of **11** for the cyclopentane core was already obtained. The modified condition is next; to a solution of **10** (45.6 mg, 0.18 mmol) in pyridine (0.5 mL) was added acetic anhydride (84.1 μL, 78 mmol) at 0 °C. The mixture was stirred for 25 h at room temperature and concentrated under reduced pressure. The residue was subjected to short-pass flash chromatography on silica gel (elution with hexane/ethyl acetate = 9/1) to give crude acetylated **11** which was used without further purification. To a solution of crude acetylated **11** in methanol (19 mL) was added NaBH<sub>4</sub> (215 mg, 5.69 mmol) at -78 °C. The mixture was stirred for 1 h, quenched with saturated NH<sub>4</sub>Cl (5 mL), and extracted with diethyl ether (10 mL x 3). The combined organic layers were washed with brine,

dried over anhydrous MgSO<sub>4</sub>, filtered, concentrated under reduced pressure. The residue was purified by flash column chromatography on silica gel (elution with hexane/ethyl acetate = 6/1) to give **11** (1.0 g, 70%) as colorless oil (1.5 : 1 diastereomeric mixture).

**2-(*tert*-butyldimethylsilyloxy)-1-(5-(*tert*-butyldimethylsilyloxy)cyclopent-1-enyl)ethyl acetate (**12**)**

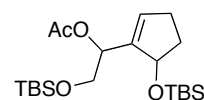

To a solution of **11** (3.12 g, 10.4 mmol) in dichloromethane (10.4 mL) was added triethylamine (3.62 mL, 26.0 mmol) and TBSOTf (2.87 mL, 12.5 mmol) successively at 0 °C. The mixture was stirred for 10 min at 0 °C, quenched with sat. NaHCO<sub>3</sub>, and extracted with dichloromethane (x3). The combined organic layers were washed with sat. NaHCO<sub>3</sub>, dried over anhydrous MgSO<sub>4</sub>, filtered, concentrated under reduced pressure. The residue was purified by flash column chromatography on silica gel (elution with hexane/dichloromethane = 2/1 to 1/1 to 1/4) to give **12** (3.8 g, 88%) as pale yellow amorphous (2 : 1 diastereomeric mixture). **12a**; IR (neat) 2929, 2857, 1741, 1362, 1237 cm<sup>-1</sup>; <sup>1</sup>H NMR (300 MHz, CDCl<sub>3</sub>) δ 5.78 (br s, 1H), 5.26 (br d, *J* = 7.5 Hz, 1H), 4.85 (m, 1H), 3.84 (dd, *J* = 10.8, 3.0 Hz, 1H), 3.63 (dd, *J* = 10.8, 8.1 Hz, 1H), 2.28-2.44 (m, 1H), 2.08-2.26 (m, 2H), 2.00 (s, 3H), 1.52-1.66 (m, 1H), 0.89 (s, 9H), 0.83 (s, 9H), 0.07 (s, 3H), 0.05 (s, 3H), 0.01 (s, 6H); <sup>13</sup>C NMR (75 MHz, CDCl<sub>3</sub>) δ 170.4, 142.8, 130.2, 78.5, 72.6, 64.8, 34.1, 29.9, 25.9, 25.7, 21.2, 18.2, 18.0, -4.3, -4.9, -5.3 (x2); HRMS (CI) *m/z* [M]<sup>+</sup> calcd for [C<sub>21</sub>H<sub>42</sub>O<sub>4</sub>Si<sub>2</sub>]<sup>+</sup> 414.2622, found 414.2623. **12b**; IR (neat) 2929, 2857, 1751, 1362, 1234 cm<sup>-1</sup>; <sup>1</sup>H NMR (300 MHz, CDCl<sub>3</sub>) δ 5.78 (dd, *J* = 7.5, 3.3 Hz, 1H), 5.76 (br s, 1H), 4.73-4.83 (m, 1H), 3.78 (dd, *J* = 11.1, 7.5 Hz, 1H), 3.67 (dd, *J* = 10.8, 3.3 Hz, 1H), 2.34-2.46 (m, 1H), 2.12-2.25 (m, 2H), 2.03 (s, 3H), 1.62-1.74 (m, 1H), 0.88 (s, 9H), 0.83 (s, 9H), 0.07 (s, 3H), 0.06 (s, 3H), 0.01 (s, 6H); <sup>13</sup>C NMR (75 MHz, CDCl<sub>3</sub>) δ 170.1, 142.1, 130.8, 77.2, 73.5, 64.7, 34.4, 29.9, 25.9, 25.7, 21.2, 18.2, 18.0, -4.3, -4.8, -5.3 (x2); HRMS (CI) *m/z* [M-H]<sup>-</sup> calcd for [C<sub>21</sub>H<sub>42</sub>O<sub>4</sub>Si<sub>2</sub>-H]<sup>-</sup> 413.2548, found 413.2547.

**(Z)-N-benzyl-2-(3-(tert-butyldimethylsilyloxy)-2-(2-(tert-butyl dimethylsilyloxy)ethylidene)cyclopentyl)acetamide (15)**

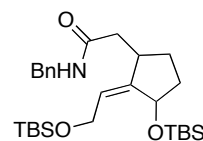

To a solution of LHMDS (3.46 mL, 1M solution in THF) in THF (10 mL) was added a solution of TBSCl (661 mg, 4.38 mmol) in HMPA (2.97 mL, 17.0 mmol) at -78 °C. The mixture was stirred for 10 min. at -78 °C. To the mixture was added a solution of **12** (784 mg, 1.89 mmol) in THF (2 mL) at -78 °C. The mixture was stirred for 20 min. at 0 °C, quenched with iced water, and extracted with diethyl ether (x2). The combined organic layers were dried over MgSO<sub>4</sub>, filtered, and concentrated under reduced pressure. The solution of residue in toluene (5 mL) was heated to reflux for 1 h, cooled down to room temperature, and concentrated under reduced pressure. To the solution of residue in THF (24 mL) was added H<sub>2</sub>O (7 mL) at room temperature. The mixture was stirred for 3 h, concentrated under reduced pressure to give carboxylic acid **14** which was used without further purification. To a solution of crude **14** in dichloromethane (7 mL) was added benzylamine (125 μL, 1.14 mmol), EDCI (272 mg, 1.42 mmol), and DMAP (23 mg, 0.19 mmol) at room temperature. The mixture was stirred for 25 min., quenched with sat. NH<sub>4</sub>Cl, and extracted with ethyl acetate (20 mL x 3). The combined organic layers were washed with brine, dried over anhydrous MgSO<sub>4</sub>, filtered, concentrated under reduce pressure. The residue was purified by flash column chromatography on silica gel (elution with hexane/ethyl acetate = 10/1 to 8/1 to 6/1 to 4/1 to 2/1) to give **15** (124 mg, 70%) as colorless amorphous (2 : 1 diastereomeric mixture). **15a**: IR (neat) 3286, 2954, 2856, 1644, 1555, 1255, 1008 cm<sup>-1</sup>; <sup>1</sup>H NMR (400 MHz, CDCl<sub>3</sub>) δ 7.25-7.36 (m, 5H), 5.81 (br s, 1H), 5.38 (ddt, *J* = 6.8, 4.8, 2.4, 1H), 4.62 (t, *J* = 6.8, 1H), 4.48 (dd, *J* = 14.8, 6.0 Hz, 1H), 4.39 (dd, *J* = 14.8, 5.6 Hz, 1H), 4.32 (s, 2H), 2.93-3.05 (m, 1H), 2.55 (dd, *J* = 14.4, 4.8 Hz, 1H), 2.05 (dd, *J* = 14.4, 9.2 Hz, 1H), 1.94-2.08 (m, 2H), 1.48-1.60 (m, 1H), 1.10-1.23 (m, 1H), 0.89 (s, 9H), 0.88 (s, 9H), 0.09 (s, 3H), 0.07 (s, 3H), 0.06 (s, 3H), 0.05 (s, 3H); <sup>13</sup>C NMR (100 MHz, CDCl<sub>3</sub>) δ 171.8, 146.8, 138.3, 128.7, 127.9, 127.5, 125.1, 72.9, 61.2, 43.6, 41.1, 39.3, 34.9, 29.2, 26.0, 25.8, 18.4, 17.9, -3.7, -4.7, -5.0, -5.1; HRMS (CI) *m/z* (M+H)<sup>+</sup> calcd for <sup>+</sup>[C<sub>28</sub>H<sub>49</sub>NO<sub>3</sub>Si<sub>2</sub>+H]<sup>+</sup> 504.3329, found 504.3332. **15b**: IR (neat) 3288, 2955, 1644, 1549, 1254 cm<sup>-1</sup>; <sup>1</sup>H NMR (400 MHz, CDCl<sub>3</sub>) δ 7.23-7.35 (m, 5H), 5.86 (br t, *J* = 5.6 Hz, 1H), 5.48 (ddt, *J* = 8.0, 4.0, 1.6 Hz, 1H), 4.62-4.67 (m, 1H), 4.43 (d, *J* = 5.6 Hz, 2H), 4.28 (ddd, *J* = 13.2, 8.0, 0.8 Hz, 1H), 4.18 (ddd, *J* = 13.2, 4.0, 1.6 Hz, 1H), 2.87 (quint, *J* = 7.2 Hz, 1H), 2.50 (dd, *J* = 14.4, 6.8 Hz, 1H), 2.30 (dd, *J* = 14.0, 8.0 Hz, 1H),

1.55-1.92 (m, 4H), 0.89 (s, 9H), 0.82 (s, 9H), 0.06 (s, 6H), 0.05 (s, 3H), 0.05 (s, 3H);  $^{13}\text{C}$  NMR (100 MHz,  $\text{CDCl}_3$ )  $\delta$  171.9, 147.2, 138.4, 128.6, 127.9, 127.4, 125.7, 71.9, 61.1, 43.5, 42.9, 40.4, 35.0, 29.2, 25.9, 25.7, 18.4, 17.8, -4.1, -4.8, -5.1, -5.1; HRMS (CI)  $m/z$  (M+H) $^+$  calcd for  $^+[\text{C}_{28}\text{H}_{49}\text{NO}_3\text{Si}_2+\text{H}]^+$  504.3329, found 504.3322.

**(Z)-N-benzyl-2-(3-hydroxy-2-(2-hydroxyethylidene)cyclopentyl)acetamide (16)**

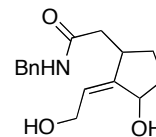

A solution of **15** (124 mg, 0.25 mmol) in acetic acid (1.5 mL), water (1.5 mL), and THF (1.5 mL) was stirred for 15 h at room temperature and concentrated under reduced pressure. The residue was purified by flash column chromatography of silica gel (elution with dichloromethane/methanol = 20/1) to give **16** (52.3 mg, 70%) as yellow amorphous (2 : 1 diastereomeric mixture). **16a**: IR (neat) 3297, 2929, 1650, 1556, 1455, 1008  $\text{cm}^{-1}$ ;  $^1\text{H}$  NMR (400 MHz,  $\text{CDCl}_3$ )  $\delta$  7.04-7.08 (m, 5H), 6.19 (br t,  $J$  = 5.6 Hz, 1H), 5.63 (tt,  $J$  = 6.4, 1.6 Hz, 1H), 4.73 (d,  $J$  = 4.8 Hz, 1H), 4.41 (d,  $J$  = 5.6 Hz, 2H), 4.28 (ddd,  $J$  = 12.8, 7.2, 1.6 Hz, 1H), 4.08 (dd,  $J$  = 12.0, 6.4 Hz, 1H), 2.77-2.88 (m, 1H), 2.54 (dd,  $J$  = 14.8, 6.0 Hz, 1H), 2.39 (dd,  $J$  = 14.8, 7.2 Hz, 1H), 1.64-1.94 (m, 4H);  $^{13}\text{C}$  NMR (100 MHz,  $\text{CDCl}_3$ )  $\delta$  172.0, 152.1, 138.2, 128.7, 127.9, 127.6, 124.2, 71.5, 59.9, 43.6, 41.1, 39.9, 34.1, 29.2; HRMS (CI)  $m/z$  (M+H) $^+$  calcd for  $^+[\text{C}_{16}\text{H}_{21}\text{NO}_3+\text{H}]^+$  276.1599, found 276.1615. **16b**: IR (neat) 3289, 2930, 1638, 1549  $\text{cm}^{-1}$ ;  $^1\text{H}$  NMR (400 MHz,  $\text{CDCl}_3$ )  $\delta$  7.25-7.40 (m, 5H), 5.78 (br t,  $J$  = 5.6 Hz, 1H), 5.64 (tt,  $J$  = 6.4, 2.0 Hz, 1H), 4.79 (t,  $J$  = 6.4 Hz, 1H), 4.44 (d,  $J$  = 5.6 Hz, 2H), 4.29 (dd,  $J$  = 13.2, 6.4 Hz, 1H), 4.19 (dd,  $J$  = 13.2, 6.4 Hz, 1H), 3.05-3.15 (m, 1H), 2.81 (br s, 1H), 2.55 (br s, 1H), 2.41 (dd,  $J$  = 14.4, 6.0 Hz, 1H), 2.11 (dd,  $J$  = 14.4, 8.4 Hz, 1H), 2.04-2.15 (m, 2H), 1.58-1.70 (m, 1H), 1.25-1.36 (m, 1H);  $^{13}\text{C}$  NMR (100 MHz,  $\text{CDCl}_3$ )  $\delta$  171.7, 152.4, 138.4, 129.0, 128.2, 127.9, 124.0, 72.4, 60.1, 43.9, 41.6, 40.3, 34.1, 29.7; HRMS (CI)  $m/z$  (M-H) $^-$  calcd for  $[\text{C}_{16}\text{H}_{21}\text{NO}_3-\text{H}]^-$  274.1443., found 274.1440.

**(Z)-N-benzyl-2-(2-(2-(benzyloxy)ethylidene)-3-hydroxycyclopentyl)acetamide (17)** (2 : 1 diastereomeric mixture)  $^1\text{H}$  NMR (300 MHz,  $\text{CDCl}_3$ )  $\delta$  7.22-7.39 (m, 10Ha+10Hb), 5.85 (br s, 1Hb), 5.72 (br s, 1Ha), 5.42-5.64 (m, 1Ha+1Hb), 4.64-4.72 (m, 1Ha+1Hb), 4.53 (s, 1Ha), 4.52 (s, 1Hb), 4.43 (d,  $J$  = 3.9 Hz, 1Ha), 4.41 (d,  $J$  = 5.4 Hz,

1Hb), 4.18 (dd,  $J = 11.7, 6.0$  Hz, 1Hb), 4.12-4.24 (m, 1Ha), 4.07 (dd,  $J = 11.7, 7.2$  Hz, 1Hb), 4.04-4.12 (m, 1Ha), 3.32 (br s, 1Hb), 3.11 (br s, 1Ha), 2.80-2.96 (m, 1Ha+1Hb), 2.53 (dd,  $J = 14.7, 5.4$  Hz, 1Hb), 2.41 (dd,  $J = 14.7, 5.4$  Hz, 1Ha), 2.35 (dd,  $J = 14.4, 6.9$  Hz, 1Hb), 2.34-2.44 (m, 1Ha), 1.55-2.10 (m, 4Ha+4Hb).

**(Z)-2-(3-hydroxy-2-(2-hydroxyethylidene)cyclopentyl)acetamide (18)**

(2 : 1 diastereomeric mixture)  $^1\text{H}$  NMR (200 MHz,  $\text{CD}_3\text{OD}$ )  $\delta$  5.42-5.64 (m, 1Ha+1Hb), 4.56-4.64 (m, 1Ha+1Hb), 4.06-4.20 (m, 2Ha+2Hb), 2.78-2.92 (m, 1Ha), 2.61-2.74 (m, 1Hb), 2.43 (dd,  $J = 14.2, 5.8$  Hz, 1Hb), 2.35 (dd,  $J = 14.2, 5.6$  Hz, 1Ha), 2.14 (dd,  $J = 14.2, 9.0$  Hz, 1Hb), 1.97 (dd,  $J = 14.2, 9.6$  Hz, 1Ha), 1.10-2.05 (m, 4Ha+4Hb).

**(Z)-3-(2-amino-2-oxoethyl)-2-(2-(tert-butyldimethylsilyloxy)ethylidene)cyclopentyl benzoate (19)**

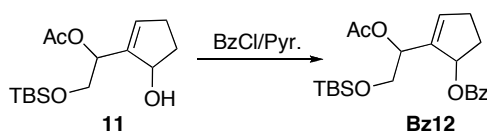

To a solution of **11** (1.62 g, 5.39 mmol) in THF (10 mL) was added pyridine (1.75 mL, 21.6 mmol), DMAP (66 mg, 0.54 mmol), and benzoyl chloride (1.25 mL, 10.8 mmol) at 0 °C. The mixture was stirred for 6 h at room temperature, quenched with sat.  $\text{NH}_4\text{Cl}$ , and extracted with ethyl acetate (x3). The combined organic layers were washed with sat.  $\text{NaHCO}_3$ , dried over anhydrous  $\text{MgSO}_4$ , filtered, concentrated under reduced pressure. The residue was purified by flash column chromatography on silica gel (elution with hexane/ethyl acetate = 10/1) to give **Bz 12** (2.17 g, quant.) as colorless amorphous (2 : 1 diastereomeric mixture). IR (neat) 2954, 2857, 1790, 1747, 1281  $\text{cm}^{-1}$ ;  $^1\text{H}$  NMR (400 MHz,  $\text{CDCl}_3$ )  $\delta$  8.09-8.04 (m, 2Ha + 2Hb), 7.46-7.53 (m, 1Ha + 1Hb), 7.34-7.42 (m, 2Ha + 2Hb), 6.11 (br s, 1Ha), 6.02-6.05 (m, 1Hb), 5.97-6.30 (m, 1Ha), 5.89-5.94 (m, 1Hb), 5.57 (t,  $J = 4.8$  Hz, 1Hb), 5.50 (t,  $J = 5.2$  Hz, 1Ha), 3.70-3.85 (m, 2Ha + 2Hb), 2.28-2.58 (m, 3Ha + 3Hb), 2.01 (s, 3Hb), 1.86 (s, 3Ha), 1.82-1.85 (m, 1Ha + 1Hb), 0.81 (s, 9Ha), 0.80 (s, 9Hb), -0.01 (s, 6Ha), -0.04 (s, 6Hb);  $^{13}\text{C}$  NMR (100 MHz,  $\text{CDCl}_3$ )  $\delta$  170.1(a), 170.1(b), 166.3(b), 166.1(a), 138.3(b), 138.1(a), 136.3(b), 134.9(a), 134.5(b), 132.8(a), 130.5(b), 130.3(a), 129.5(b), 129.5(a), 128.8(b), 128.2(a), 79.9(a),





**(Z)-3-(2-amino-2-oxoethyl)-2-(2-hydroxyethylidene)cyclopentyl benzoate (20)**

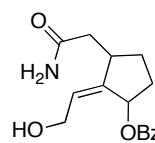

The mixture of **19** (115 mg, 0.29 mmol) in acetic acid (1.5 mL), H<sub>2</sub>O (0.5 mL), and THF (0.5 mL) was stirred for 4.6 h at room temperature and concentrated under reduced pressure. The residue was purified by flash column chromatography on silica gel (elution with ethyl acetate to ethyl acetate/methanol = 8/1) to give **20** (104 mg, quant.) as colorless amorphous (2 : 1 diastereomeric mixture). IR (neat) 3347, 3198, 2961, 1714, 1452, 1279 cm<sup>-1</sup>; <sup>1</sup>H NMR (400 MHz, CDCl<sub>3</sub>) δ 7.88-8.01 (m, 2Ha+2Hb), 7.55 (tt, *J* = 7.6, 1.2 Hz, 1Ha+1Hb), 7.42 (td, *J* = 7.6, 1.2 Hz, 2Ha+2Hb), 6.17 (br s, 1Hb), 6.04 (br s, 1Ha), 5.88-5.98 (m, 2Ha+2Hb), 5.77 (tt, *J* = 6.4, 2.0 Hz, 1Ha), 5.69 (tt, *J* = 6.8, 2.0 Hz, 1Hb), 4.14-4.28 (m, 2Ha+2Hb), 3.02-3.18 (m, 1Hb), 2.90-3.0 (m, 1Ha), 2.54 (dd, *J* = 14.4, 6.0 Hz, 1Ha), 2.49 (dd, *J* = 14.4, 6.0 Hz, 1Hb), 2.14-2.40 (m, 1Ha+1Hb), 2.35 (dd, *J* = 14.4, 8.0 Hz, 1Ha), 2.20 (dd, *J* = 14.4, 8.0 Hz, 1Hb), 1.84-2.32 (m, 2Ha+3Hb), 1.72-1.84 (m, 1Hb), 1.60-1.74 (m, 1Ha), 1.39 (dq, *J* = 12.4, 7.6 Hz, 1Ha); <sup>13</sup>C NMR (100 MHz, CDCl<sub>3</sub>) δ 174.8, 174.7, 166.2, 166.0, 145.0, 144.9, 133.2, 133.2, 130.2, 130.0, 129.6, 129.5, 128.5, 128.4, 128.0, 126.5, 74.6, 74.4, 60.0, 59.6, 41.8, 40.0, 39.8, 39.1, 32.4, 31.4, 29.8, 29.4; HRMS (CI) *m/z* (M+H)<sup>+</sup> calcd for <sup>+</sup> [C<sub>16</sub>H<sub>19</sub>NO<sub>4</sub>+H]<sup>+</sup> 289.1392, found 290.1396.

**2-oxo-6a-vinylhexahydro-2H-cyclopenta[b]furan-6-yl benzoate (21)**

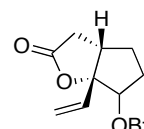

To a solution of **19** (14.5 mg, 0.05 mmol) in nitromethane (0.25 mL) was added Hg(OTf)<sub>2</sub> (100 μL, 0.1 M solution in acetonitrile). The mixture was heated to 60 °C for 7 h, quenched with triethylamine (0.2 mL), and concentrated under reduced pressure. The residue was purified by flash column chromatography on silica gel (elution with chloroform) to give **21** (10.9 mg, 80%) as colorless amorphous (1 : 1.5 diastereomeric mixture). IR (neat) 2961, 1787, 1724, 1275, 1117 cm<sup>-1</sup>; <sup>1</sup>H NMR (300 MHz, CDCl<sub>3</sub>) δ **21a**; 7.96-8.04 (m, 2H), 7.59 (tt, *J* = 7.5, 1.2 Hz, 1H), 7.47 (tt, 8.4, *J* = 1.2 Hz, 2H), 6.07 (dd, *J* = 17.1, 11.1 Hz, 1H), 5.45-5.51 (m, 1H), 5.44 (dd, *J* = 17.1, 0.9 Hz, 1H), 5.25 (dd, *J* = 11.1, 0.9 Hz, 1H), 2.92 (td, *J* = 9.3, 4.5 Hz, 1H), 2.84 (dd, *J* = 17.7, 9.3 Hz, 1H), 2.40 (d, *J* = 17.1 Hz, 1H), 2.20-2.45 (m, 2H), 1.94-2.06 (m, 1H), 1.58-1.72 (m, 1H), **21b**; 8.02-8.10 (m, 2H), 7.57 (tt, *J* = 7.5, 1.8 Hz, 1H), 7.44 (tt, *J* = 7.4, 1.5 Hz, 2H), 5.94 (dd, *J* = 17.4, 10.8 Hz, 1H),

5.43 (dd,  $J = 17.4, 0.6$  Hz, 1H), 5.32 (dd,  $J = 9.3, 5.7$  Hz, 1H), 5.24 (dd,  $J = 10.8, 0.3$  Hz, 1H), 2.90 (dd,  $J = 18.0, 9.3$  Hz, 1H), 2.70-2.80 (m, 1H), 2.38 (dd,  $J = 18.0, 2.1$  Hz, 1H), 1.95-2.28 (m, 3H), 1.61-1.72 (m, 1H);  $^{13}\text{C}$  NMR (75 MHz,  $\text{CDCl}_3$ )  $\delta$  **21a**; 176.1, 165.0, 133.9, 133.3, 129.8, 129.6, 128.5, 116.2, 95.7, 80.5, 42.2, 35.4, 30.9, 30.8, **21b**; 176.7, 166.0, 135.7, 133.3, 129.9, 129.5, 128.4, 116.5, 93.2, 77.7, 40.7, 36.3, 28.4, 28.3; HRMS (CI)  $m/z$  (M+H) $^+$  calcd for  $^+[\text{C}_{16}\text{H}_{16}\text{O}_4+\text{H}]^+$  273.1127, found 273.1126.

**(Z)-2-(2-(tert-butyl dimethylsilyloxy)ethylidene)-3-(cyanomethyl)cyclopentyl benzoate (1 : 1.5 diastereomeric mixture)**

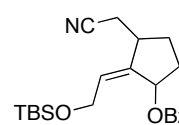

IR (neat) 2955, 2856, 2247, 1715, 1264, 1109  $\text{cm}^{-1}$ ;  $^1\text{H}$  NMR (300 MHz,  $\text{CDCl}_3$ )  $\delta$  7.94-8.02 (m, 2Ha+2Hb), 7.49-7.57 (m, 1Ha+1Hb), 7.41 (t,  $J = 7.8$  Hz, 1Ha+1Hb), 5.82-5.95 (m, 1Ha+1Hb), 5.74 (ddt,  $J = 6.9, 4.5, 1.5$  Hz, 1Hb), 5.66 (tt,  $J = 6.0, 2.4$  Hz, 1Ha), 4.40 (ddd,  $J = 13.5, 7.5, 1.5$  Hz, 1Ha), 4.24 (dd,  $J = 6.3, 1.8$  Hz, 2Hb), 4.19 (ddd,  $J = 13.5, 4.5, 2.1$  Hz, 1Ha), 2.92-3.06 (m, 1Ha), 2.76-2.90 (m, 1Hb), 2.64 (dd,  $J = 16.5, 5.4$  Hz, 1Hb), 2.58 (dd,  $J = 16.5, 5.1$  Hz, 1Ha), 2.54 (dd,  $J = 16.5, 7.8$  Hz, 1Hb), 2.39 (dd,  $J = 16.5, 8.1$  Hz, 1Ha), 1.70-2.40 (m, 4Ha+4Hb), 0.82 (s, 9Hb), 0.81 (s, 9Ha), -0.01 (s, 3Ha+3Hb), -0.03 (s, 3Hb), -0.03 (s, 3Ha);  $^{13}\text{C}$  NMR (75 MHz,  $\text{CDCl}_3$ )  $\delta$  165.8, 165.7, 133.1, 133.1, 130.6, 130.0, 129.6, 129.6, 129.5, 129.4, 128.4, 128.4, 118.3, 118.3, 74.0, 73.9, 60.8, 60.5, 39.5, 38.9, 32.4, 31.4, 29.5, 29.3, 25.8, 23.0, 21.6, 18.2, -5.3, -5.3; HRMS (FAB)  $m/z$  (M+Na) $^+$  calcd for  $^+[\text{C}_{22}\text{H}_{31}\text{NO}_3\text{Si}+\text{Na}]^+$  408.1971, found 408.1988.

**(Z)-N-(2-(3-(tert-butyl dimethylsilyloxy)-2-(2-(tert-butyl dimethylsilyloxy)ethylidene)cyclopentyl)acetyl)-4-methylbenzenesulfonohydrazide (23)**

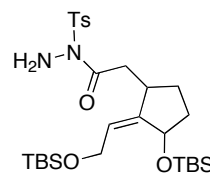

To a solution of LHMDS (10.5 mL, 1.6 M solution in THF) in THF (25 mL) was added a solution of TBSCl (3.2 g, 21.3 mmol) in HMPA (14.4 mL, 82.6 mmol) at  $-78$   $^\circ\text{C}$ . The mixture was stirred for 15 min. at  $-78$   $^\circ\text{C}$ . To the mixture was added a solution of **12** (3.8 mg, 9.16 mmol) in THF (5 mL) at  $-78$   $^\circ\text{C}$ . The mixture was stirred for 1 h at  $0$   $^\circ\text{C}$ , quenched with iced water, and extracted with hexane (x2). The combined organic layers were dried over  $\text{MgSO}_4$ , filtered, and concentrated under

reduced pressure. The solution of residue in toluene (15 mL) was heated to reflux for 50 min, cooled down to room temperature, and concentrated under reduced pressure. To the solution of residue in THF (65 mL) was added H<sub>2</sub>O (10 mL) at room temperature. The mixture was stirred for 3 h, concentrated under reduced pressure to give carboxylic acid **14** which was used without further purification. To a solution of crude **14** in dichloromethane (70 mL) was added *N*-tosylhydrazide (3.3 g, 17.8 mmol), EDCI (4.3 g, 22.2 mmol), and DMAP (362 mg, 3.0 mmol) at room temperature. The mixture was stirred for 1 h, quenched with sat. NH<sub>4</sub>Cl, and extracted with dichloromethane (50 mL x 3). The combined organic layers were washed with brine, dried over anhydrous MgSO<sub>4</sub>, filtered, concentrated under reduce pressure. The residue was purified by flash column chromatography on silica gel (elution with hexane/ethyl acetate = 8/1) to give **23** (3.6 g, 68%) as colorless amorphous (2 : 1 diastereomeric mixture). **23a**: IR (neat) 3363, 2955, 2857, 1703, 1360, 1255, 1167 cm<sup>-1</sup>; <sup>1</sup>H NMR (400 MHz, CDCl<sub>3</sub>) δ 7.89 (dt, *J* = 8.4, 2.0 Hz, 2H), 7.33 (d, *J* = 8.4 Hz, 2H), 5.29-5.35 (m, 1H), 4.62 (br t, *J* = 6.0 Hz, 1H), 4.42 (s, 2H), 4.33 (ddd, *J* = 13.6, 7.6, 1.6 Hz, 1H), 4.29 (dddd, *J* = 13.6, 4.4, 3.2, 1.2 Hz, 1H), 3.00 (dd, *J* = 15.2, 4.8, 1H), 2.87-2.97 (m, 1H), 2.60 (dd, *J* = 15.6, 9.2 Hz, 1H), 2.44 (s, 3H), 1.91-2.02 (m, 2H), 1.44-1.56 (m, 1H), 1.08-1.16 (m, 1H), 0.90 (s, 9H), 0.86 (s, 9H), 0.09 (s, 3H), 0.07 (s, 3H), 0.06 (s, 6H); <sup>13</sup>C NMR (100 MHz, CDCl<sub>3</sub>) δ 173.8, 146.7, 145.2, 134.9, 129.6, 128.7, 125.0, 72.8, 61.2, 40.0, 38.5, 34.9, 29.3, 26.0, 25.8, 21.7, 18.4, 17.9, -3.8, -4.7, -5.04, -5.07; HRMS (CI) *m/z* (M+H)<sup>+</sup> calcd for <sup>+</sup>[C<sub>28</sub>H<sub>50</sub>N<sub>2</sub>O<sub>5</sub>SSi<sub>2</sub>+H]<sup>+</sup> 583.3057., found 583.3055. **23b**: IR (neat) 3369, 2955, 2857, 1703, 1359, 1169 cm<sup>-1</sup>; <sup>1</sup>H NMR (300 MHz, CDCl<sub>3</sub>) δ 7.89 (dt, *J* = 8.4, 1.6 Hz, 2H), 7.33 (d, *J* = 8.4 Hz, 2H), 5.37 (ddt, *J* = 8.0, 4.0, 1.6 Hz, 1H), 4.61 (t, *J* = 3.2 Hz, 1H), 4.40 (s, 2H), 4.29 (ddd, *J* = 13.2, 8.0, 0.8 Hz, 1H), 4.19 (ddd, *J* = 13.2, 4.0, 1.6 Hz, 1H), 3.03 (d, *J* = 11.2 Hz, 1H), 2.73-2.84 (m, 2H), 2.44 (s, 3H), 1.82 (dtd, *J* = 12.0, 6.8, 4.8 Hz, 1H), 1.64-1.72 (m, 2H), 1.42-1.52 (m, 1H), 0.89 (s, 9H), 0.86 (s, 9H), 0.08 (s, 3H), 0.07 (s, 3H), 0.06 (s, 3H), 0.05 (s, 3H); <sup>13</sup>C NMR (100 MHz, CDCl<sub>3</sub>) δ 174.1, 147.8, 145.4, 135.2, 129.8, 128.9, 125.6, 72.2, 61.5, 42.6, 39.2, 35.3, 29.5, 26.2, 26.1, 21.9, 18.6, 18.1, -3.8, -4.5, -4.8, -4.9; HRMS (CI) *m/z* (M-H)<sup>-</sup> calcd for <sup>+</sup>[C<sub>28</sub>H<sub>50</sub>N<sub>2</sub>O<sub>5</sub>SSi<sub>2</sub>-H]<sup>-</sup> 581.2901, found 581.2900.

***N*-(2-(3-hydroxy-2-(2-hydroxyethylidene)cyclopentyl)acetyl)-4-methylbenzenesulfonohydrazide (**24**)**

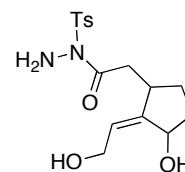

A mixture of **23** (3.6 g, 6.25 mmol) in acetic acid (20 mL), H<sub>2</sub>O (20 mL), and THF (20 mL) was stirred for 15 h at room temperature and concentrated under reduced pressure. The residue was purified by flash column chromatography on silica gel (elution with dichloromethane/methanol = 20/1) to give **24** (1.73 g, 78%) as colorless amorphous. **24a**: IR (neat) 3370, 2955, 2871, 1696, 1595, 1354, 1171 cm<sup>-1</sup>; <sup>1</sup>H NMR (300 MHz, CDCl<sub>3</sub>) δ 7.89 (dt, *J* = 8.4, 1.8 Hz, 2H), 7.34 (d, *J* = 8.4 Hz, 2H), 5.53 (tt, *J* = 6.6, 1.8 Hz, 1H), 4.71-4.78 (m, 1H), 4.48 (s, 2H), 4.25 (ddd, *J* = 12.6, 6.9, 1.2 Hz, 1H), 4.08 (dd, *J* = 12.0, 6.6 Hz, 1H), 3.08 (dd, *J* = 16.2, 5.4 Hz, 1H), 2.87 (dd, *J* = 15.9, 7.2 Hz, 1H), 2.74-2.86 (m, 1H), 2.45 (s, 3H), 1.55-1.90 (m, 4H); <sup>13</sup>C NMR (75 MHz, CDCl<sub>3</sub>) δ 173.8, 152.2, 145.4, 134.7, 129.6, 128.8, 124.2, 71.7, 59.8, 40.2, 39.5, 34.1, 29.3, 21.7; HRMS (CI) *m/z* (M-H)<sup>+</sup> calcd for [C<sub>16</sub>H<sub>22</sub>N<sub>2</sub>O<sub>5</sub>S-H]<sup>+</sup> 353.1178., found 353.1180. **24b**: IR (neat) 3362, 2957, 2871, 1695, 1359, 1170 cm<sup>-1</sup>; <sup>1</sup>H NMR (300 MHz, CDCl<sub>3</sub>) δ 7.89 (dt, *J* = 8.4, 1.8 Hz, 2H), 7.34 (d, *J* = 8.4 Hz, 2H), 5.54 (tt, *J* = 6.3, 2.1 Hz, 1H), 4.74-4.83 (m, 1H), 4.43 (s, 2H), 4.26 (ddd, *J* = 13.2, 6.3, 1.5 Hz, 1H), 4.16 (dd, *J* = 13.2, 6.3 Hz, 1H), 2.98-3.10 (m, 1H), 2.93 (dd, *J* = 15.9, 5.7 Hz, 1H), 2.76 (br s, 1H), 2.62 (dd, *J* = 15.9, 8.1 Hz, 1H), 2.45 (s, 3H), 1.95-2.15 (m, 2H), 1.69 (br, s, 1H), 1.53-1.70 (m, 1H), 1.16-1.32 (m, 1H); <sup>13</sup>C NMR (75 MHz, CDCl<sub>3</sub>) δ 173.5, 152.0, 145.4, 134.7, 129.6, 128.7, 123.9, 72.0, 59.8, 40.2, 39.3, 33.8, 29.4, 21.7; HRMS (CI) *m/z* (M-H)<sup>-</sup> calcd for [C<sub>16</sub>H<sub>22</sub>N<sub>2</sub>O<sub>5</sub>S-H]<sup>-</sup> 353.1178., found 353.1189.

**7-hydroxy-2-tosyl-7a-vinylhexahydro-1*H*-cyclopenta[*c*]pyridazin-3(2*H*)-one (**25**)**

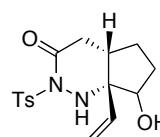

To a solution of **24** (507 mg, 1.43 mmol) in nitromethane (14.3 mL) was added Hg(OTf)<sub>2</sub> (0.29 mL, 0.1 M solution in acetonitrile) at room temperature. The mixture was stirred for 20 min, quenched with triethylamine (10 mL), and concentrated under reduced pressure. The residue was purified by flash column chromatography on silica gel (elution with hexane/ethyl acetate = 1/1) to give **25a** (136 mg, 28%) as colorless crystals and **25b** (270 mg, 56%) as colorless amorphous. **25a**; mp 166 °C (from dichloromethane-diethyl ether); IR (neat) 3492, 3294, 2958, 1715,

1360, 1173  $\text{cm}^{-1}$ ;  $^1\text{H}$  NMR (400 MHz,  $\text{CDCl}_3$ )  $\delta$  7.97 (d,  $J = 8.4$  Hz, 2H), 7.32 (d,  $J = 8.4$  Hz, 2H), 5.98 (dd,  $J = 17.6, 10.8$  Hz, 1H), 5.28 (d,  $J = 17.6$  Hz, 1H); 5.25 (d,  $J = 10.8$  Hz, 1H), 4.85 (s, 1H), 4.08 (q,  $J = 6.8$  Hz, 1H), 2.81 (d,  $J = 6.8$  Hz, 1H), 2.52-2.61 (m, 2H), 2.49 (dd,  $J = 15.6, 9.2$  Hz, 1H), 2.44 (s, 3H), 1.97-2.08 (m, 1H), 1.93 (dtd,  $J = 13.6, 7.6, 5.6$  Hz, 1H), 1.82 (ddt,  $J = 13.6, 8.0, 5.6$  Hz, 1H), 1.63 (dtd,  $J = 12.4, 7.6, 5.6$  Hz, 1H);  $^{13}\text{C}$  NMR (100 MHz,  $\text{CDCl}_3$ )  $\delta$  172.0, 145.2, 140.0, 135.2, 129.5, 128.9, 117.0, 78.4, 70.2, 39.3, 32.9, 30.9, 28.3, 21.7; HRMS (CI)  $m/z$  ( $\text{M}+\text{H}$ ) $^+$  calcd for  $[\text{C}_{16}\text{H}_{20}\text{N}_2\text{O}_4\text{S}+\text{H}]^+$  337.1222, found 337.1220. **25 $\beta$** ; IR (neat) 3483, 3282, 2961, 1714, 1359, 1179  $\text{cm}^{-1}$ ;  $^1\text{H}$  NMR (300 MHz,  $\text{CDCl}_3$ )  $\delta$  7.95 (d,  $J = 8.1$  Hz, 2H), 7.33 (d,  $J = 8.1$  Hz, 2H), 5.97 (dd,  $J = 17.7, 11.1$  Hz, 1H), 5.37 (d,  $J = 11.1$  Hz, 1H); 5.32 (d,  $J = 17.7$  Hz, 1H), 4.48 (s, 1H), 4.05-4.32 (m, 1H), 2.66 (tdd,  $J = 8.7, 8.7, 6.3, 4.5$  Hz, 1H), 2.55 (dd,  $J = 15.3, 6.3$  Hz, 1H), 2.44 (s, 3H), 2.37 (dd,  $J = 15.3, 4.5$  Hz, 1H), 2.32-2.43 (m, 1H), 1.88-2.03 (m, 2H), 1.51 (dddd,  $J = 12.0, 12.0, 10.2, 6.6$  Hz, 1H), 1.19-1.32 (m, 1H);  $^{13}\text{C}$  NMR (75 MHz,  $\text{CDCl}_3$ )  $\delta$  171.9, 145.2, 137.3, 134.9, 129.4, 128.8, 117.6, 76.9, 70.4, 40.2, 38.0, 30.9, 27.2, 21.7; HRMS (CI)  $m/z$  ( $\text{M}+\text{H}$ ) $^+$  calcd for  $[\text{C}_{16}\text{H}_{20}\text{N}_2\text{O}_4\text{S}+\text{H}]^+$  337.1222, found 337.1213.

**2-tosyl-7a-vinyltetrahydro-1H-cyclopenta[*c*]pyridazine-3,7(2H,7aH)-dione (26)**

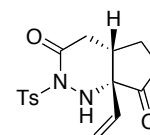

To a solution of the mixture of **25 $\alpha$**  and **25 $\beta$**  (499 mg, 1.48 mmol) in dichloromethane (10 mL) was added DMSO (5 mL, 70.6 mmol), triethylamine (1.24 mL, 8.91 mmol), and a solution of  $\text{SO}_3\cdot\text{Pyr}$  (591 mg, 3.71 mmol) successively at 0  $^\circ\text{C}$ . The mixture was stirred for 1 h at room temperature, quenched with sat.  $\text{NH}_4\text{Cl}$ , extracted with dichloromethane (20 mL x 3). The combined organic layers were washed with brine, dried over anhydrous  $\text{MgSO}_4$ , filtered, concentrated under reduced pressure. The residue was purified by flash column chromatography on silica gel (elution with hexane/ethyl acetate = 2/1 to 1/1) to give **26** (494 mg, quant.) as colorless amorphous; IR (neat) 3289, 2958, 2254, 1747, 1368, 1175  $\text{cm}^{-1}$ ;  $^1\text{H}$  NMR (300 MHz,  $\text{CDCl}_3$ )  $\delta$  7.85 (d,  $J = 8.4$  Hz, 2H), 7.28 (d,  $J = 8.4$  Hz, 2H), 5.81 (dd,  $J = 17.4, 10.5$  Hz, 1H), 5.45 (d,  $J = 17.4$  Hz, 1H); 5.32 (d,  $J = 10.5$  Hz, 1H), 5.28 (s, 1H), 2.83 (tt,  $J = 7.8, 5.4$  Hz, 1H), 2.65 (dd,  $J = 15.0, 5.4$  Hz, 1H), 2.48 (dd,  $J = 15.0, 8.1$  Hz, 1H), 2.42 (s, 3H), 2.32-2.45 (m 1H), 2.12-2.34 (m, 2H), 1.45-1.59 (m, 1H);  $^{13}\text{C}$  NMR (75 MHz,  $\text{CDCl}_3$ )

$\delta$  213.6, 171.1, 145.1, 134.7, 134.6, 129.2, 128.9, 118.6, 70.5, 39.0, 37.3, 35.5, 24.0, 21.6; HRMS (CI)  $m/z$  (M)<sup>+</sup> calcd for [C<sub>16</sub>H<sub>18</sub>N<sub>2</sub>O<sub>4</sub>S]<sup>+</sup> 334.0987, found 333.0989.

**2-tosyl-7a-vinyl-4,4a-dihydro-1H-cyclopenta[c]pyridazine-3,7(2H, 7aH)-dione (28)**

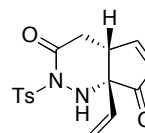

A solution of **26** (385 mg, 1.15 mmol) and HMDS (0.48 mL, 2.3 mmol) in dichloromethane (12 mL) was stirred for 30 min at room temperature. To the mixture was added Trimethylsilyliodide (0.25 mL, 1.70 mmol) at 0 °C. The mixture was stirred for 1 h at 0 °C, stirred for 15 min. at room temperature, quenched with sat. NaHCO<sub>3</sub>, extracted with dichloromethane (20 mL x 2). The combined organic layers were dried over anhydrous MgSO<sub>4</sub>, filtered, concentrated under reduced pressure. To a solution of residue in DMSO (12 mL) was added Pd(OAc)<sub>2</sub> (258 mg, 1.15 mmol) was added at room temperature. The mixture was stirred for 4 h, quenched with H<sub>2</sub>O, extracted with ethyl acetate. The combined organic layers were washed with brine, dried over anhydrous MgSO<sub>4</sub>, filtered, concentrated under reduced pressure. The residue was purified by flash column chromatography on silica gel (elution with hexane/ethyl acetate = 2/3) to give **28** (298 mg, 78% from **26**) as white solid. mp 182 °C (from dichloromethane-diethyl ether); IR (neat) 3243, 2924, 1715, 1354, 1167 cm<sup>-1</sup>; <sup>1</sup>H NMR (400 MHz, CDCl<sub>3</sub>)  $\delta$  7.89 (d,  $J$  = 8.4 Hz, 2H), 7.50 (dd,  $J$  = 6.0, 2.8 Hz, 1H), 7.30 (d,  $J$  = 8.4 Hz, 2H), 6.09 (dd,  $J$  = 6.0, 2.0 Hz, 1H), 5.89 (dd,  $J$  = 17.6, 10.8 Hz, 1H), 5.47 (d,  $J$  = 17.6 Hz, 1H); 5.46 (s, 1H), 5.40 (d,  $J$  = 10.8 Hz, 1H), 3.48 (dddd,  $J$  = 6.8, 4.8, 2.8, 2.0 Hz, 1H), 2.94 (dd,  $J$  = 14.4, 6.8 Hz, 1H), 2.55 (dd,  $J$  = 14.4, 4.8 Hz, 1H), 2.43 (s, 3H); <sup>13</sup>C NMR (100 MHz, CDCl<sub>3</sub>)  $\delta$  204.6, 168.3, 163.4, 145.5, 134.6, 134.4, 133.2, 129.4, 129.3, 119.6, 68.1, 46.4, 36.2, 21.8; HRMS (CI)  $m/z$  (M+H)<sup>+</sup> calcd for [C<sub>16</sub>H<sub>16</sub>N<sub>2</sub>O<sub>4</sub>S+H]<sup>+</sup> 333.0909, found 333.0904.

**6-(hydroxymethyl)-2-tosyl-7a-vinyl-4,4a-dihydro-1H-cyclopenta[c]pyridazine-3,7(2H,7aH)-dione (29)**

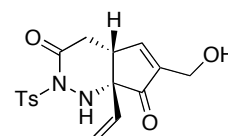

To a solution of **28** (289 mg, 0.87 mmol) in THF (9 mL) was added formaldehyde (0.35 mL, 4.34 mmol, 37% water solution) and *n*-tributylphosphine (87  $\mu$ L, 0.35 mmol) at room temperature. The mixture was stirred

for 2 h, quenched with H<sub>2</sub>O, extracted with ethyl acetate (x 3). The combined organic layers were dried over anhydrous MgSO<sub>4</sub>, filtered, and concentrated under reduced pressure. The residue was purified by flash column chromatography on silica gel (elution with hexane/ethyl acetate = 1/4) to give **29** (289 mg, 92%) as colorless amorphous; IR (neat) 3460, 3208, 2979, 2595, 1709, 1357 cm<sup>-1</sup>; <sup>1</sup>H NMR (300 MHz, CD<sub>3</sub>OD) δ 7.71 (d, *J* = 8.4 Hz, 2H), 7.36 (dt, *J* = 2.7, 1.8 Hz, 1H), 7.27 (d, *J* = 8.4 Hz, 2H), 5.78 (dd, *J* = 17.4, 10.8 Hz, 1H), 5.37 (d, *J* = 17.4 Hz, 1H), 5.22 (d, *J* = 10.8 Hz, 1H), 4.00 (dt, *J* = 15.3, 1.8 Hz, 1H), 3.83 (br d, *J* = 15.3 Hz, 1H), 3.40-3.47 (m, 1H), 2.89 (dd, *J* = 15.3, 7.2 Hz, 1H), 2.45 (dd, *J* = 15.3, 3.6 Hz, 1H), 2.33 (s, 3H); <sup>13</sup>C NMR (75 MHz, CDCl<sub>3</sub>) δ 204.9, 172.7, 159.6, 148.1, 147.0, 137.1, 135.5, 130.7, 130.4, 119.4, 71.2, 57.5, 46.1, 37.1, 21.9; HRMS (CI) *m/z* (M+H)<sup>+</sup> calcd for [C<sub>17</sub>H<sub>18</sub>N<sub>2</sub>O<sub>5</sub>S+H]<sup>+</sup> 363.1014, found 363.1008

**7-hydroxy-6-(hydroxymethyl)-5-(nitromethyl)-2-tosyl-7a-vinyl hexahydro-1*H*-cyclopenta[*c*]pyridazin-3(2*H*)-one (**31**)**

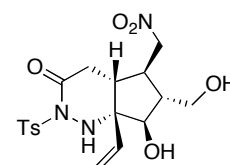

To a solution of **29** (229 mg, 0.63 mmol) in nitromethane (12.6 mL) was added tetramethylguanidine (33 μL, 0.27 mmol) at 0 °C. The mixture was stirred for 3.5 h, quenched with sat. 1 M HCl, and extracted with ethyl acetate (30 mL x 3). The combined organic layers were washed with sat. NaHCO<sub>3</sub> and brine, dried over anhydrous MgSO<sub>4</sub>, filtered, and concentrated under reduced pressure to give crude **30**. The solution of crude **30** in methanol (5 mL) was added a solution of NaBH<sub>4</sub> (19.0 mg, 0.5 mmol) in methanol (1.3 mL) at -78 °C. The mixture was stirred for 30 min, quenched with sat. NH<sub>4</sub>Cl, and extracted with ethyl acetate (20 mL x 3). The combined organic layers were dried over anhydrous MgSO<sub>4</sub>, filtered, concentrated under reduced pressure. The residue was purified by flash column chromatography on silica gel (elution with dichloromethane/methanol = 20/1) to give **31** (132 mg, 49% from **29**) as colorless amorphous. IR (neat) 3487, 3289, 2922, 2253, 1715, 1550, 1361, 1169 cm<sup>-1</sup>; <sup>1</sup>H NMR (400 MHz, CDCl<sub>3</sub>) δ 7.89 (d, *J* = 8.4 Hz, 2H), 7.31 (d, *J* = 8.4 Hz, 2H), 5.97 (dd, *J* = 17.6, 10.8 Hz, 1H), 5.33 (d, *J* = 10.8 Hz, 1H), 5.25 (d, *J* = 17.6 Hz, 1H), 5.03 (s, 1H), 4.62 (dd, *J* = 12.4, 4.0 Hz, 1H), 4.43 (dd, *J* = 12.4, 7.2 Hz, 1H), 4.08 (d, *J* = 10.8 Hz, 1H), 3.96 (br s, 1H), 3.82 (br d, *J* = 9.2 Hz, 1H), 3.76 (br d, *J* = 9.2 Hz, 1H), 3.30 (br s, 1H), 2.52-2.65 (m, 2H), 2.49 (dd, *J* = 16.8, 8.0 Hz, 1H), 2.42 (s, 3H), 2.18-2.32 (m,

1H), 1.65-1.76 (m, 1H); <sup>13</sup>C NMR (100 MHz, CDCl<sub>3</sub>) δ 171.3, 145.8, 136.6, 134.4, 129.6, 129.0, 118.7, 76.6, 75.4, 69.4, 59.5, 46.6, 42.2, 39.3, 36.8, 21.7; HRMS (CI) m/z (M+H)<sup>+</sup> calcd for [C<sub>18</sub>H<sub>23</sub>N<sub>3</sub>O<sub>7</sub>S+H]<sup>+</sup> 426.1335, found 426.1338.

**6-(azidomethyl)-7-hydroxy-5-(nitromethyl)-2-tosyl-7a-vinylhexahydro-1H-cyclopenta[c]pyridazin-3(2H)-one (32)**

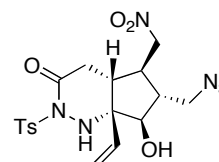

To a solution of **31** (22.4 mg, 0.053 mmol) in pyridine (0.27 mL) was added methanesulfonylchloride (9.0 mg, 0.079 mmol) at 0 °C.

The mixture was stirred for 45 min at room temperature, quenched with sat. NaHCO<sub>3</sub>, and extracted with ethyl acetate (20 mL x 2). The combined organic layers were dried over anhydrous MgSO<sub>4</sub>, filtered, and concentrated under reduced pressure. The residue was filtered through silica gel pad (elution with dichloromethane/methanol = 9/1) and concentrated under reduced pressure. The solution of residue in DMF (0.57 mL) was added sodium azide (7.2 mg, 0.11 mmol) at room temperature. The mixture was heated to 60 °C for 3 h, diluted with ethyl acetate (5 mL), filtered, and washed with sat. NaHCO<sub>3</sub>. The aqueous layer was extracted with ethyl acetate (20 mL x 3). The combined organic layers were dried over anhydrous MgSO<sub>4</sub>, filtered, and concentrated under reduced pressure. The residue was purified by flash column chromatography of silica gel (elution with hexane/ethyl acetate = 1/1) to give **32** (16 mg, 67% from **31**) as colorless crystal. mp 151 °C (from dichloromethane-diethyl ether); IR (neat) 3489, 3289, 2924, 2104, 1715, 1555, 1366, 1276, 1174cm<sup>-1</sup>; <sup>1</sup>H NMR (300 MHz, CDCl<sub>3</sub>) δ 7.94 (d, J = 8.1 Hz, 2H), 7.35 (d, J = 8.1 Hz, 2H), 5.96 (dd, J = 17.4, 11.1 Hz, 1H), 5.43 (d, J = 11.1 Hz, 1H), 5.33 (d, J = 17.4 Hz, 1H), 4.66 (s, 1H), 4.58 (dd, J = 12.3, 4.2 Hz, 1H), 4.41 (dd, J = 12.3, 6.6 Hz, 1H), 3.85 (d, J = 10.8 Hz, 1H), 3.63 (dd, J = 12.9, 3.3 Hz, 1H), 3.54 (dd, J = 12.9, 5.1 Hz, 1H), 2.57-2.69 (m, 2H), 2.45 (s, 3H), 2.42-2.48 (m, 1H), 1.95-2.10 (m, 1H), 1.74 (tdd, J = 11.4, 5.1, 3.6 Hz, 1H); <sup>13</sup>C NMR (100 MHz, CDCl<sub>3</sub>) δ 170.5, 145.8, 135.8, 134.4, 129.6, 129.0, 118.8, 75.9, 75.1, 68.7, 49.5, 43.7, 42.1, 40.2, 36.3, 21.8; HRMS (CI) m/z (M+H)<sup>+</sup> calcd for [C<sub>18</sub>H<sub>22</sub>N<sub>6</sub>O<sub>6</sub>S+H]<sup>+</sup> 451.1400, found 451.1403.



KPa-189-up-up-pure-1H

exp4 Proton

| SAMPLE      |             | SPECIAL    |          |
|-------------|-------------|------------|----------|
| date        | Oct 31 2008 | Temp       | not used |
| solvent     | cdcl3       | gain       | not used |
| file        | exp         | spin       | 16       |
| ACQUISITION |             | SPECIAL    |          |
| sw          | 6410.3      | pw90       | 12.500   |
| at          | 3.500       | alfa       | 10.000   |
| np          | 44872       | FLAGE      |          |
| fb          | 4000        | li         | n        |
| bs          | 4           | in         | n        |
| dl          | 1.500       | dp         | y        |
| nt          | 12000       | hs         | nn       |
| ct          | 20          | PROCESSING |          |
| TRANSMITTER |             | fn         | not used |
| tn          | H1          | DISPLAY    |          |
| sfrq        | 399.814     | sp         | -199.9   |
| tof         | 399.5       | wp         | 3598.1   |
| tpwr        | 59          | rfl        | 795.2    |
| pw          | 6.250       | rfp        | 0        |
| DECOUPLER   |             | rp         | 74.1     |
| dn          | C13         | lp         | 1.8      |
| dof         | 0           | PLOT       |          |
| dn          | nnn         | vc         | 370      |
| dmm         | c           | sc         | 0        |
| gpwr        | 37          | vs         | 225      |
| dmf         | 29412       | th         | 12       |
|             |             | ai         | cdc ph   |

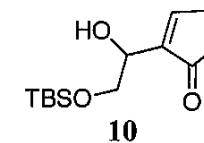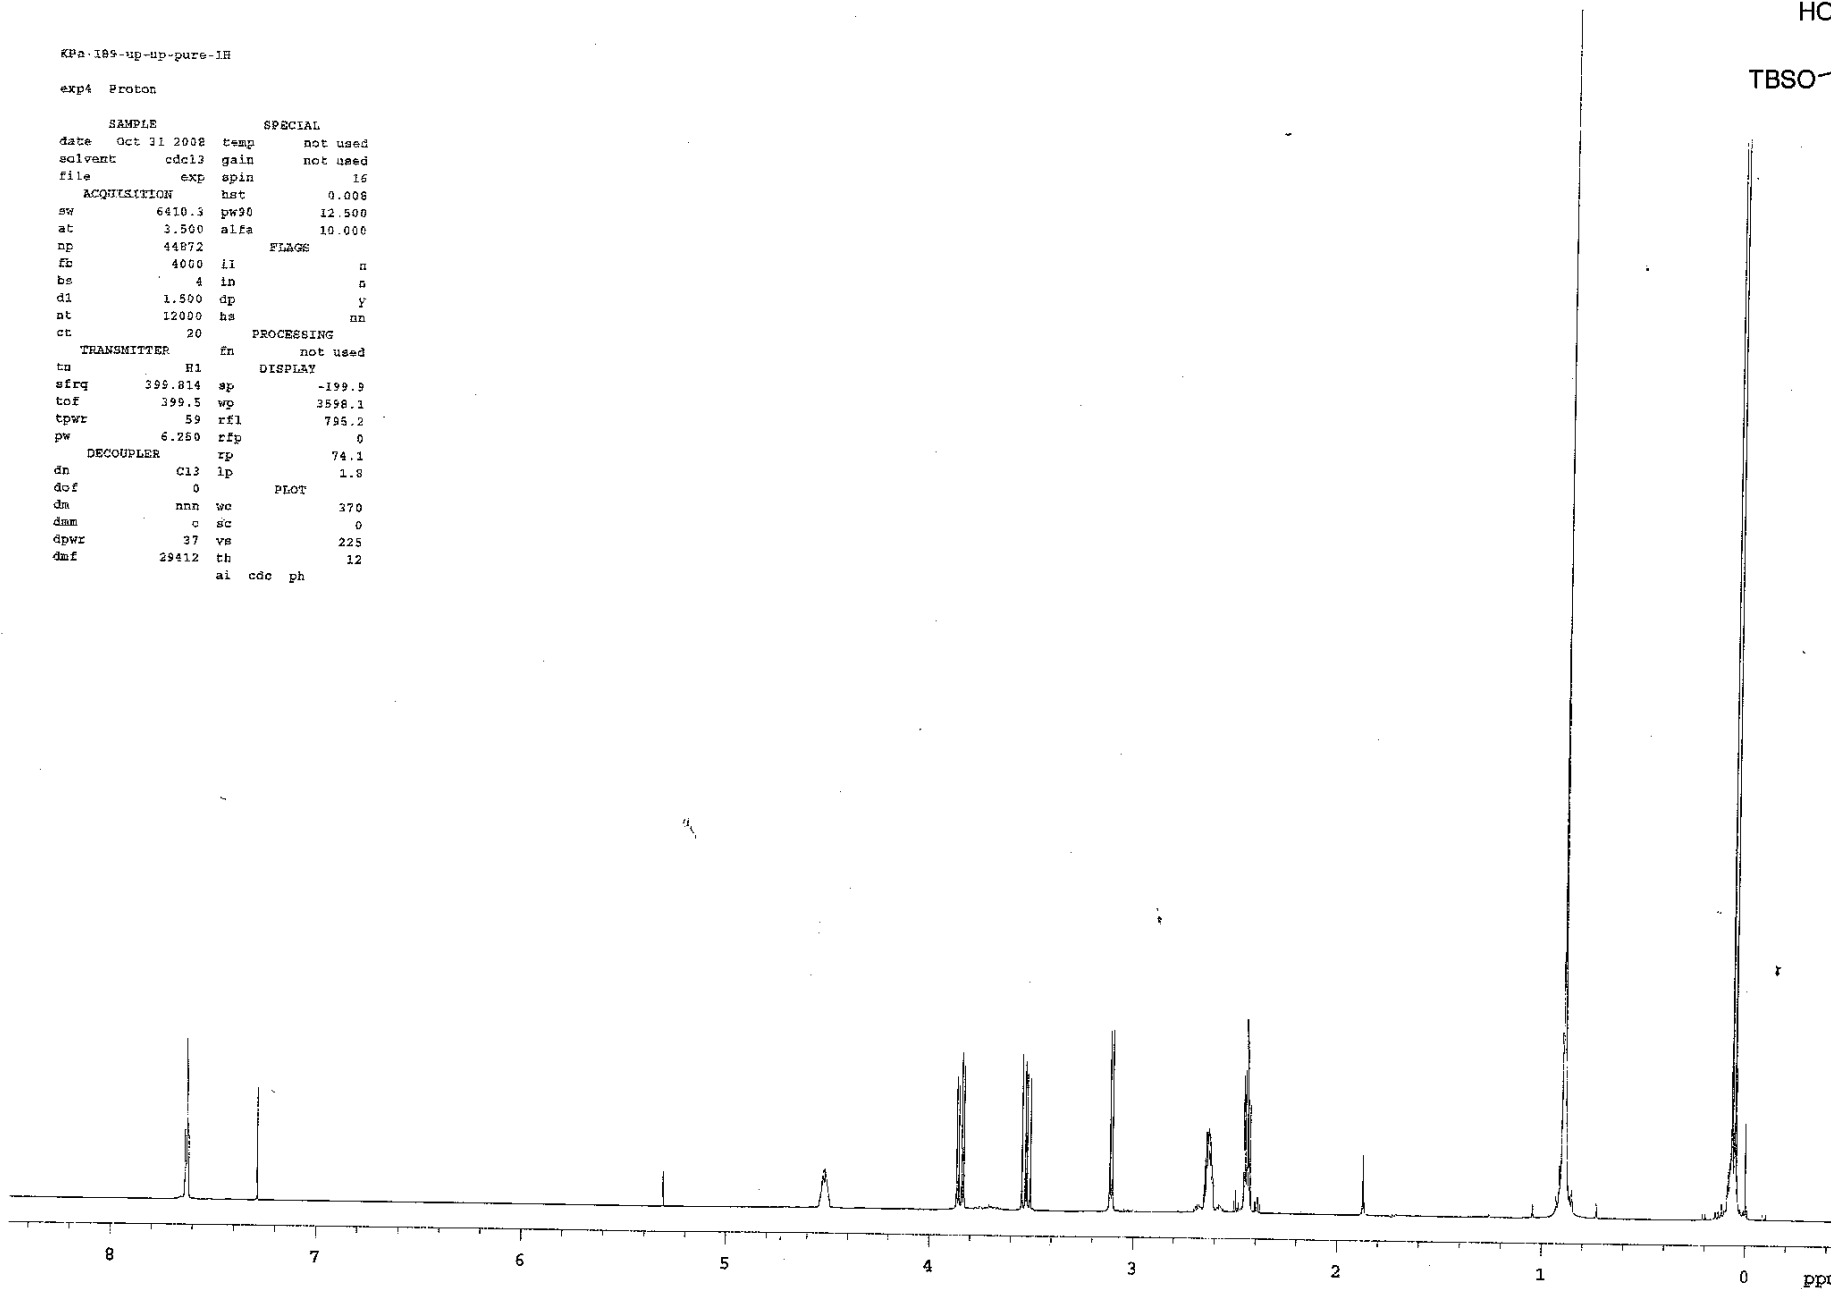

KPa 18% up-up-pure-13C

exp5 Carbon

| SAMPLE      |             | SPECIAL    |          |
|-------------|-------------|------------|----------|
| date        | Oct 31 2008 | temp       | not used |
| solvent     | cdcl3       | gain       | not used |
| file        | exp         | spin       | 16       |
| ACQUISITION |             | hst        | 0.009    |
| aw          | 24509.8     | pw90       | 13.209   |
| at          | 1.300       | alfa       | 10.000   |
| ap          | 63750       | PLAGS      |          |
| fb          | 17600       | il         | n        |
| bs          | 16          | in         | n        |
| dl          | 0.700       | dp         | y        |
| nt          | 30000       | hs         | nn       |
| ct          | 192         | PROCESSING |          |
| TRANSMITTER |             | lb         | 1.00     |
| tn          | 013         | fn         | not used |
| sfrq        | 100.542     | DISPLAY    |          |
| tof         | 1042.7      | sp         | -1723.1  |
| tpwr        | 56          | wp         | 24509.1  |
| pw          | 6.600       | rfl        | 9467.6   |
| DECOUPLER   |             | rflp       | 7744.0   |
| dn          | H1          | rp         | -110.2   |
| dof         | 0           | lp         | 15.2     |
| dm          | YYY         | ELOT       |          |
| dmm         | w           | wc         | 770      |
| dpwr        | 41          | sc         | 0        |
| dmf         | 10200       | va         | 1309     |
|             |             | th         | 10       |
|             | al          | cdc        | ph       |

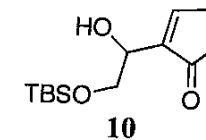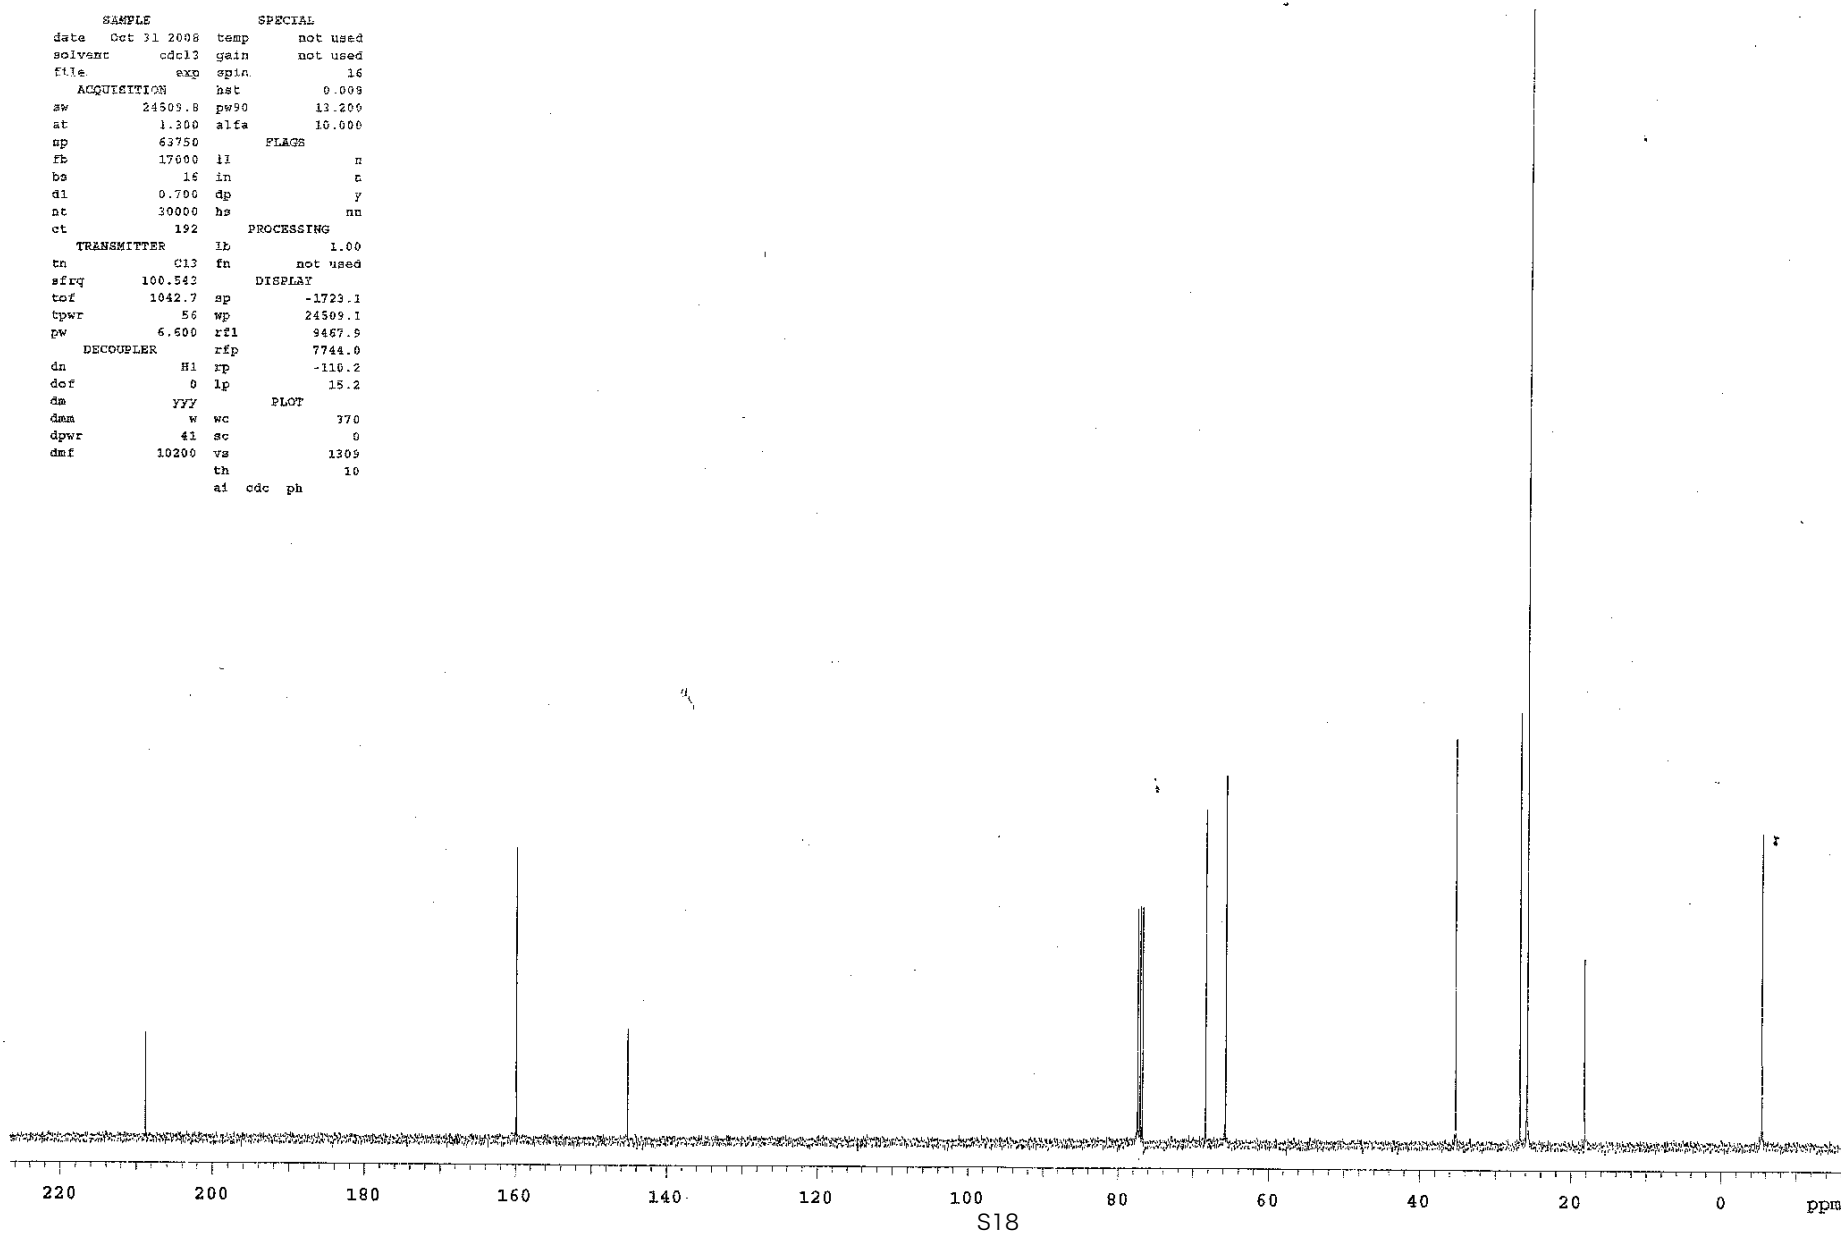



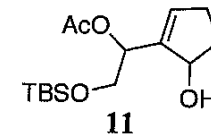

KPa-373-down-13C

Pulse Sequence: s2pul

Solvent: CDCl3

Ambient temperature

File: KPa-373-down-13C-102008\_23\_24

INOVA-600 "NMR"

Pulse 54.2 degrees

Acq. time 1.815 sec

Width 18761.7 Hz

288 repetitions

OBSERVE C13, 75.4279239 MHz

DECOUPLE H1, 299.9730594 MHz

Power 39 dB

continuously on

WALTZ-16 modulated

DATA PROCESSING

Line broadening 2.0 Hz

FT size 131072

Total time 151 hr, 59 min, 22 sec

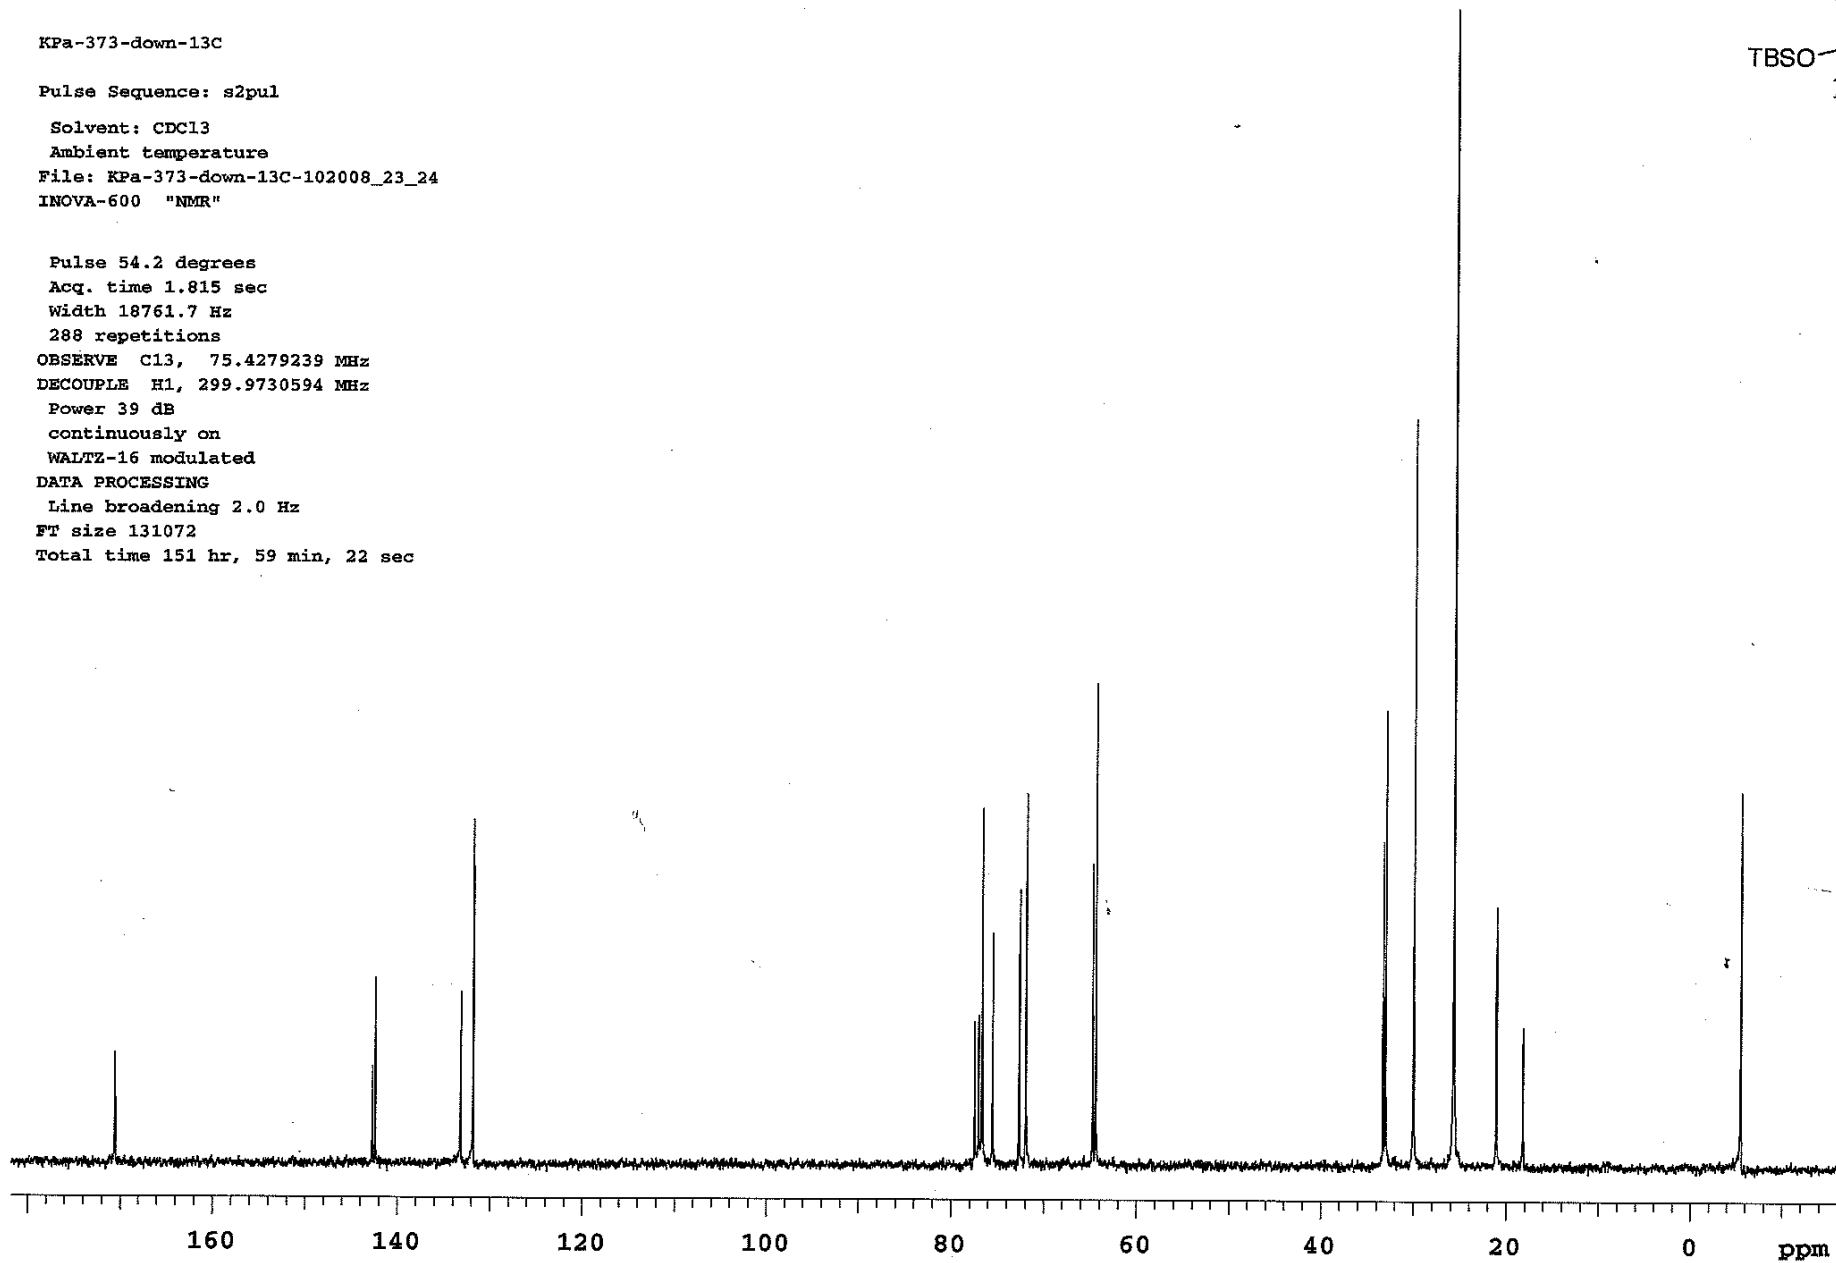

Pulse Sequence: s2pul

Solvent: CDCl3  
Ambient temperature  
Mercury-300 "m300"

PULSE SEQUENCE  
Relax. delay 0.500 sec  
Pulse 31.3 degrees  
Acq. time 3.555 sec  
Width 4500.5 Hz  
32 repetitions

OBSERVE H1, 300.1944050 MHz  
DATA PROCESSING  
FT size 32768  
Total time 2 minutes

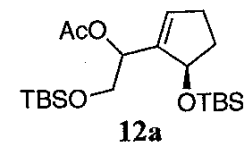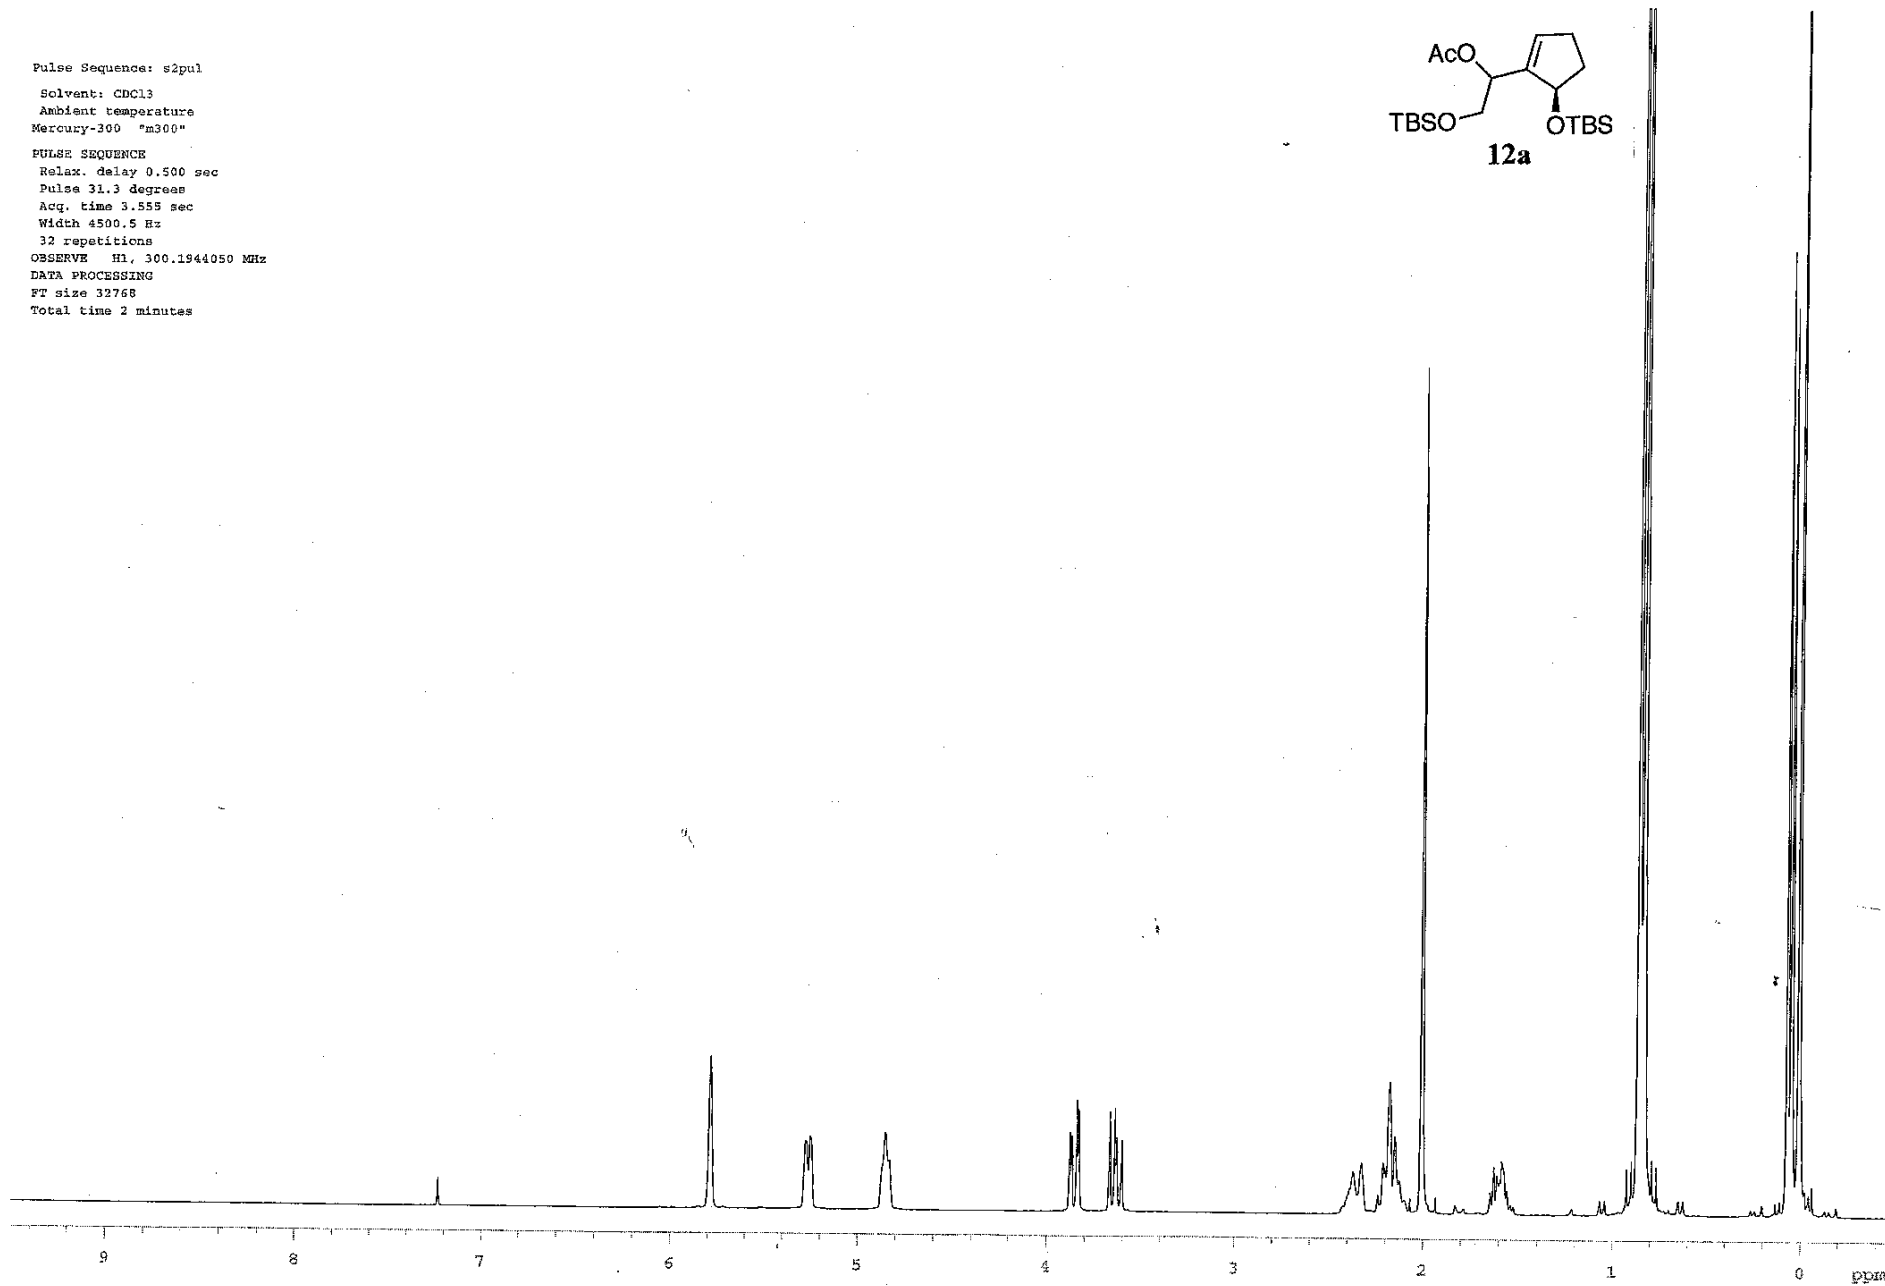

13C OBSERVE

Pulse Sequence: n2pul

Solvent: CDCl3  
Ambient temperature  
Mercury-300 "m300"

PULSER SEQUENCE

Relax. delay 0.294 sec  
Pulse 40.0 degrees  
Acq. time 1.705 sec  
Width 18863.2 Hz  
464 repetitions

OBSERVE C13, 75.4839403 MHz  
DECOUPLE H1, 300.1958432 MHz

Power 38 dB  
continuously on  
WALTZ-16 modulated

DATA PROCESSING

Line broadening 1.0 Hz  
FT size 65536

Total time 15 minutes

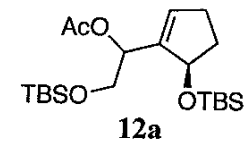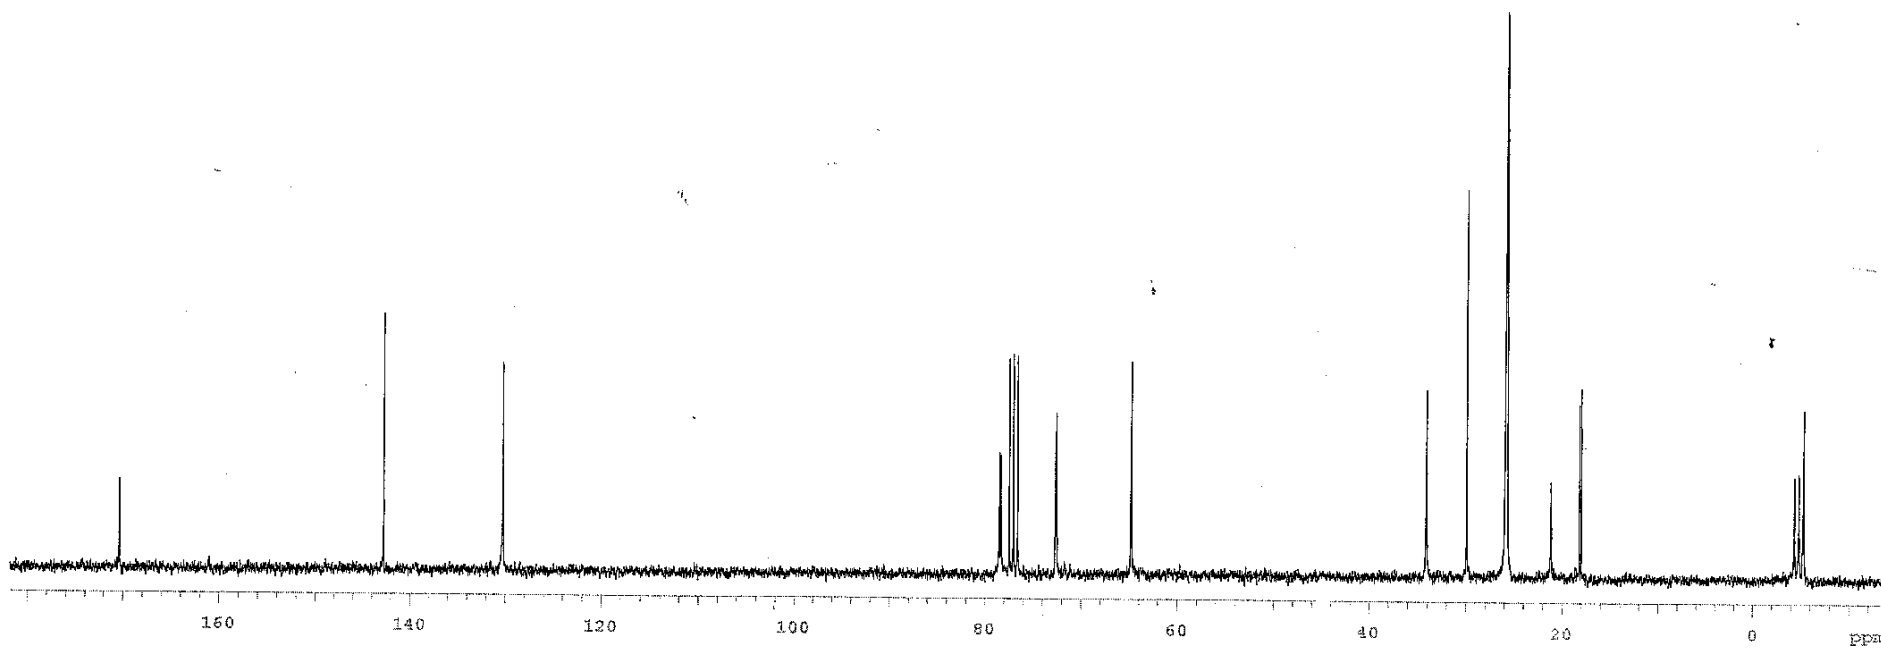

Pulse Sequence: s2pul  
Solvent: CDCl3  
Ambient temperature  
Mercury-300 "m300"  
PULSE SEQUENCE  
Relax. delay 0.500 sec  
Pulse 31.3 degrees  
Acq. time 3.555 sec  
Width 4500.5 Hz  
36 repetitions  
OBSERVE H1, 300.1944053 MHz  
DATA PROCESSING  
FT size 32768  
Total time 2 minutes

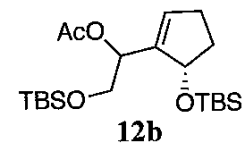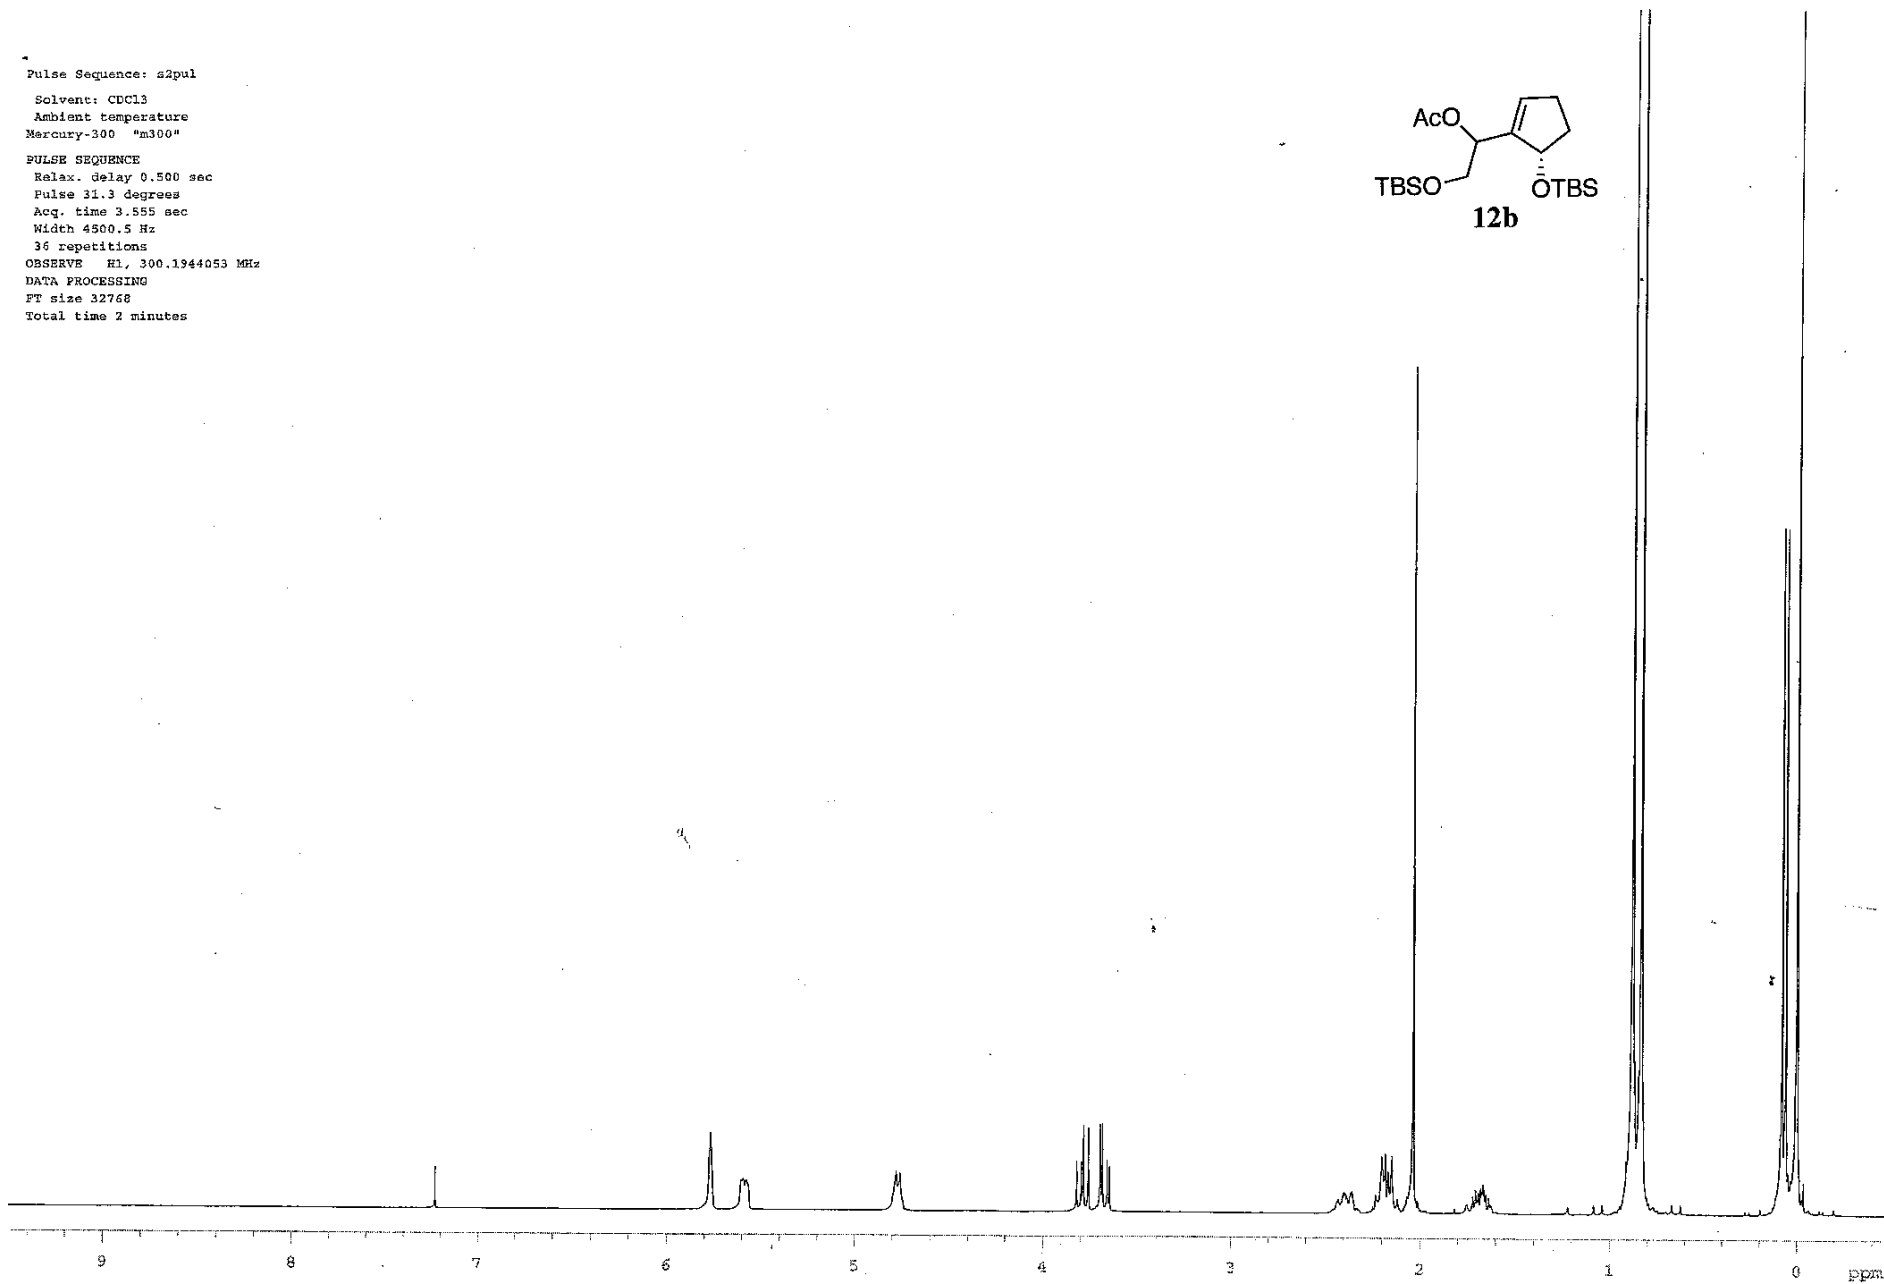

13C OBSERVE

Pulse Sequence: s2pul

Solvent: CDCl3  
Ambient temperature  
Mercury-300 "m300"

PULSE SEQUENCE

Relax. delay 0.294 sec

Pulse 46.0 degrees

Acq. time 1.705 sec

Width 18863.2 Hz

280 repetitions

OBSERVE C13, 75.4839403 MHz

DECOUPLE H1, 300.1958432 MHz

Power 38 dB

continuously on

WALTZ-16 modulated

DATA PROCESSING

Line broadening 1.0 Hz

FT size 65536

Total time 9 minutes

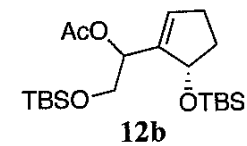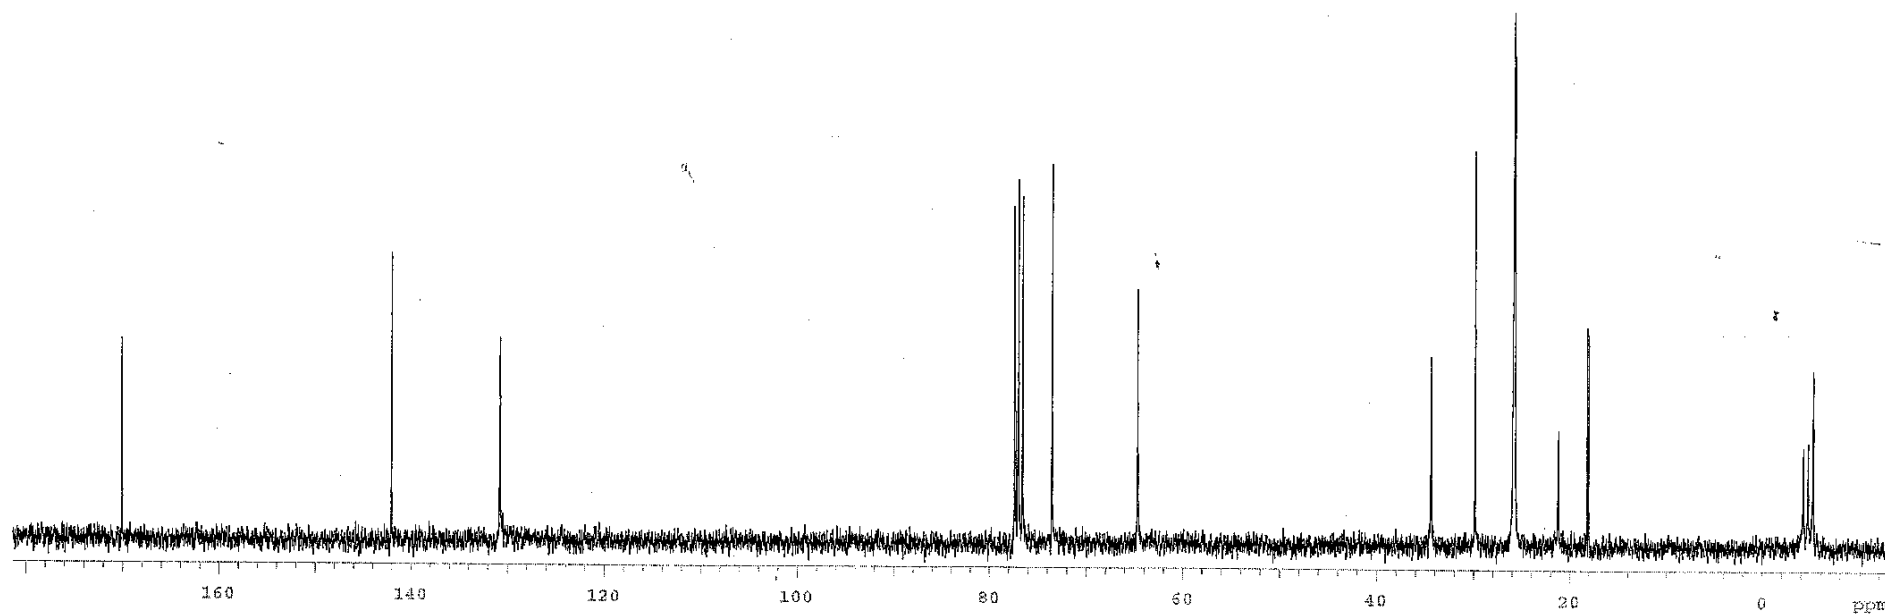



KPa-380 (up) -pure-1H

exp6 Proton

| SAMPLE      |            | SPECIAL    |          |
|-------------|------------|------------|----------|
| date        | Nov 1 2008 | temp       | not used |
| solvent     | cdcl3      | gain       | not used |
| file        | exp        | spin       | 16       |
| ACQUISITION |            | FLAGS      |          |
| sw          | 6410.3     | pw90       | 12.500   |
| at          | 3.500      | alfa       | 10.000   |
| np          | 44872      |            |          |
| zb          | 4000       | l1         | n        |
| ba          | 4          | in         | n        |
| cl          | 1.500      | dp         | y        |
| nt          | 12000      | hs         | nn       |
| ct          | 32         | PROCESSING |          |
| TRANSMITTER |            | fn         | not used |
| ta          | H1         | DISPLAY    |          |
| sfrq        | 399.814    | ap         | -200.1   |
| tof         | 399.5      | wp         | 1598.1   |
| tpwr        | 59         | rfl        | 780.5    |
| pw          | 6.250      | rfp        | 0        |
| DECOUPLER   |            | zp         | 74.5     |
| dn          | C13        | lp         | -15.0    |
| dof         | 0          | PLOT       |          |
| dm          | nnn        | wc         | 370      |
| dmm         | c          | ec         | 0        |
| dpwr        | 37         | vs         | 131.2    |
| dmf         | 29412      | th         | 12       |
|             |            | ai         | cdc ph   |

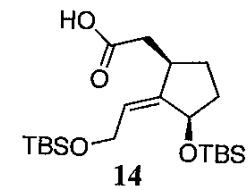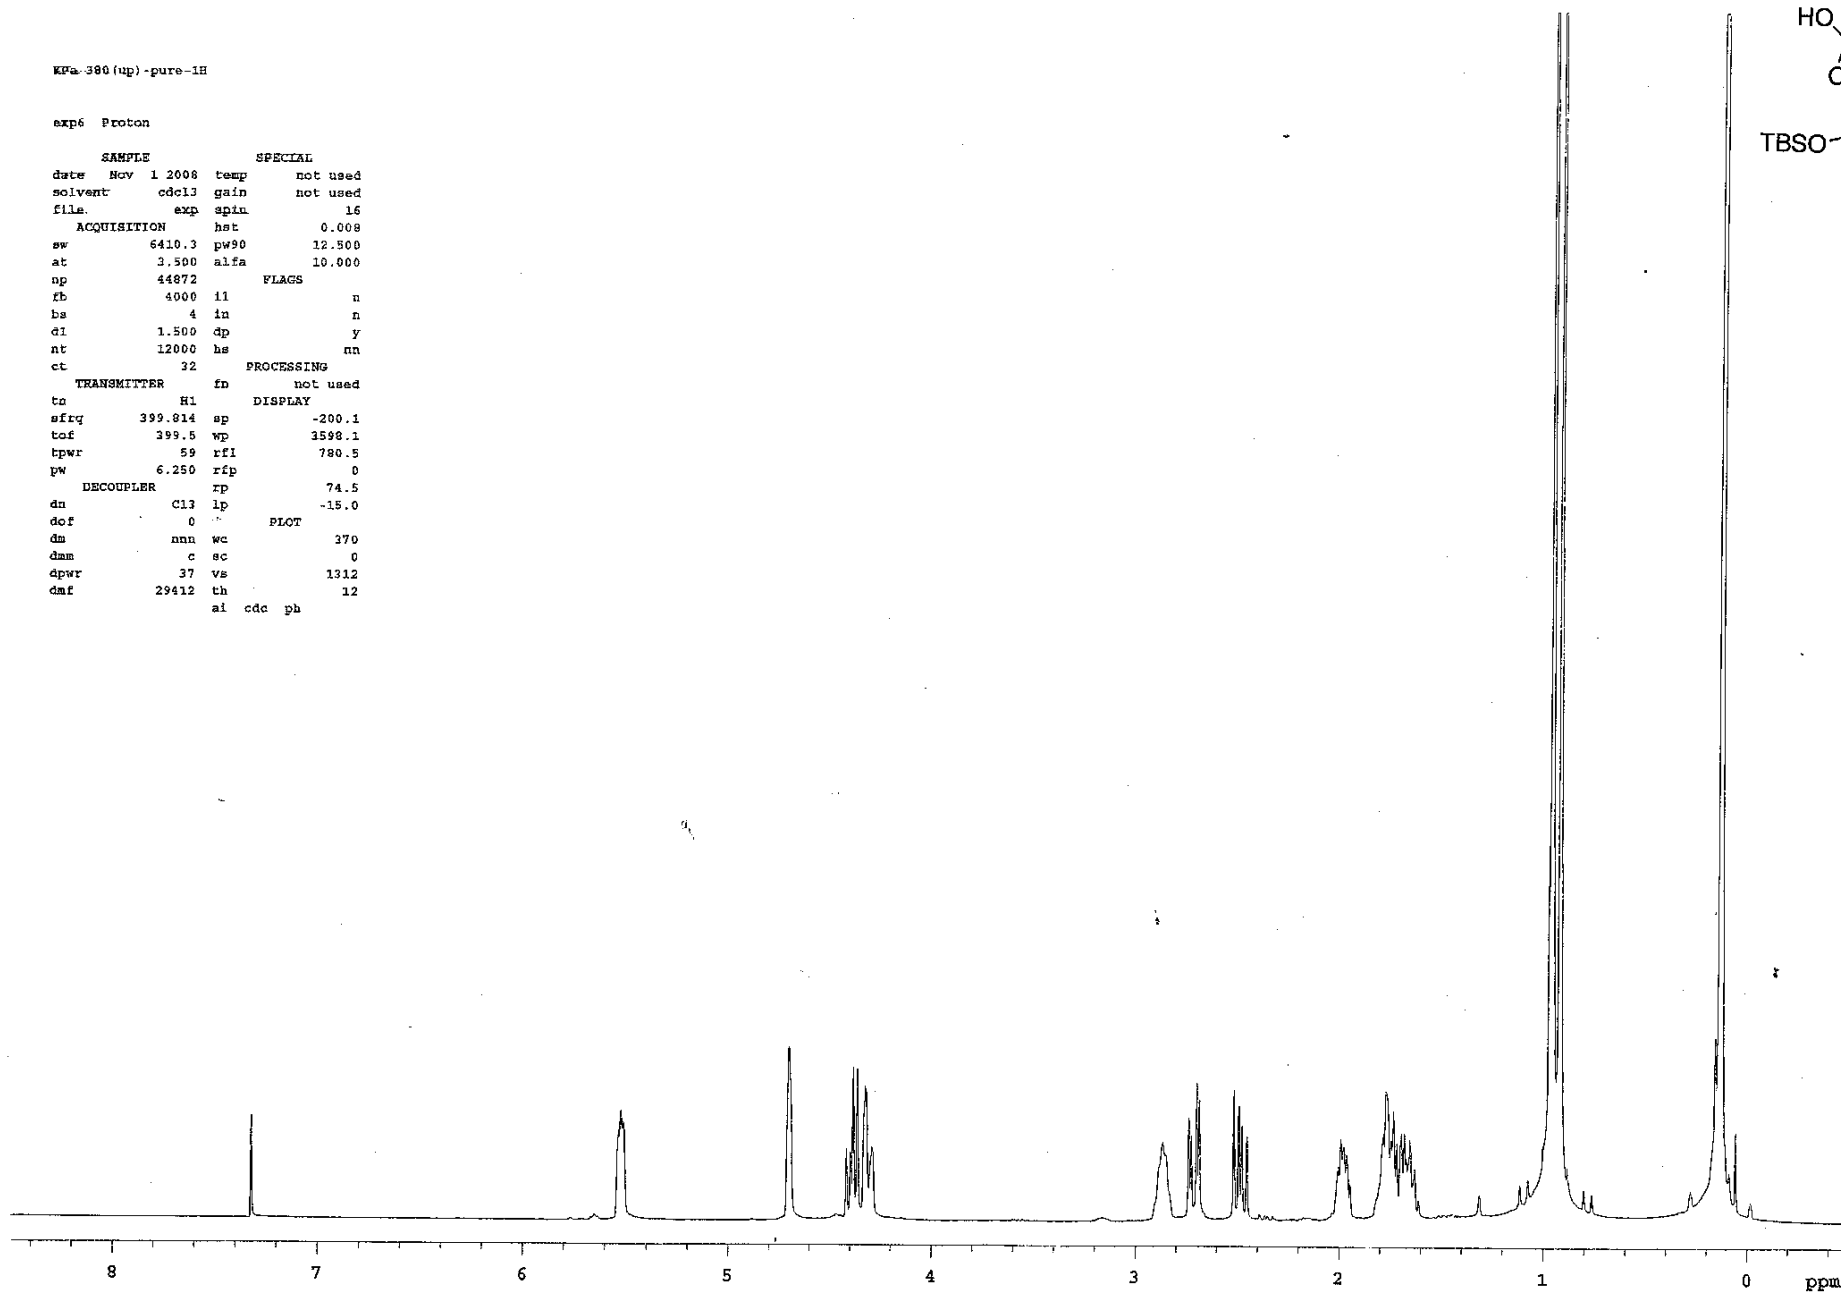

KPa-380 (up) -pure-13C

exp7 Carbon

| SAMPLE      |            | SPECIAL    |          |
|-------------|------------|------------|----------|
| date        | Nov 1 2008 | temp       | not used |
| solvent     | cdcl3      | gain       | not used |
| file        | exp        | spin       | 16       |
| ACQUISITION |            | hst        | 0.008    |
| sw          | 24509.8    | pw90       | 13.200   |
| at          | 1.300      | alfa       | 10.000   |
| op          | 63750      | FLAGS      |          |
| fb          | 17000      | il         | n        |
| bs          | 16         | in         | n        |
| dl          | 0.700      | dp         | y        |
| nt          | 30000      | hs         | nn       |
| ct          | 192        | PROCESSING |          |
| TRANSMITTER |            | lb         | 1.00     |
| tn          | C13        | fn         | not used |
| sfrq        | 100.542    | DISPLAY    |          |
| tof         | 1042.7     | ep         | -1005.9  |
| tpwr        | 56         | vp         | 20106.4  |
| pw          | 6.600      | rfl        | 9464.9   |
| DECOUPLER   |            | rfp        | 7744.0   |
| dn          | H1         | rp         | -119.4   |
| dof         | 0          | lp         | 10.1     |
| dm          | yyy        | PLOT       |          |
| dms         | w          | wc         | 370      |
| dpwr        | 41         | sc         | 0        |
| dmi         | 10200      | vs         | 2096     |
|             |            | th         | 8        |
|             |            | ai         | cdc ph   |

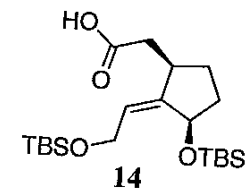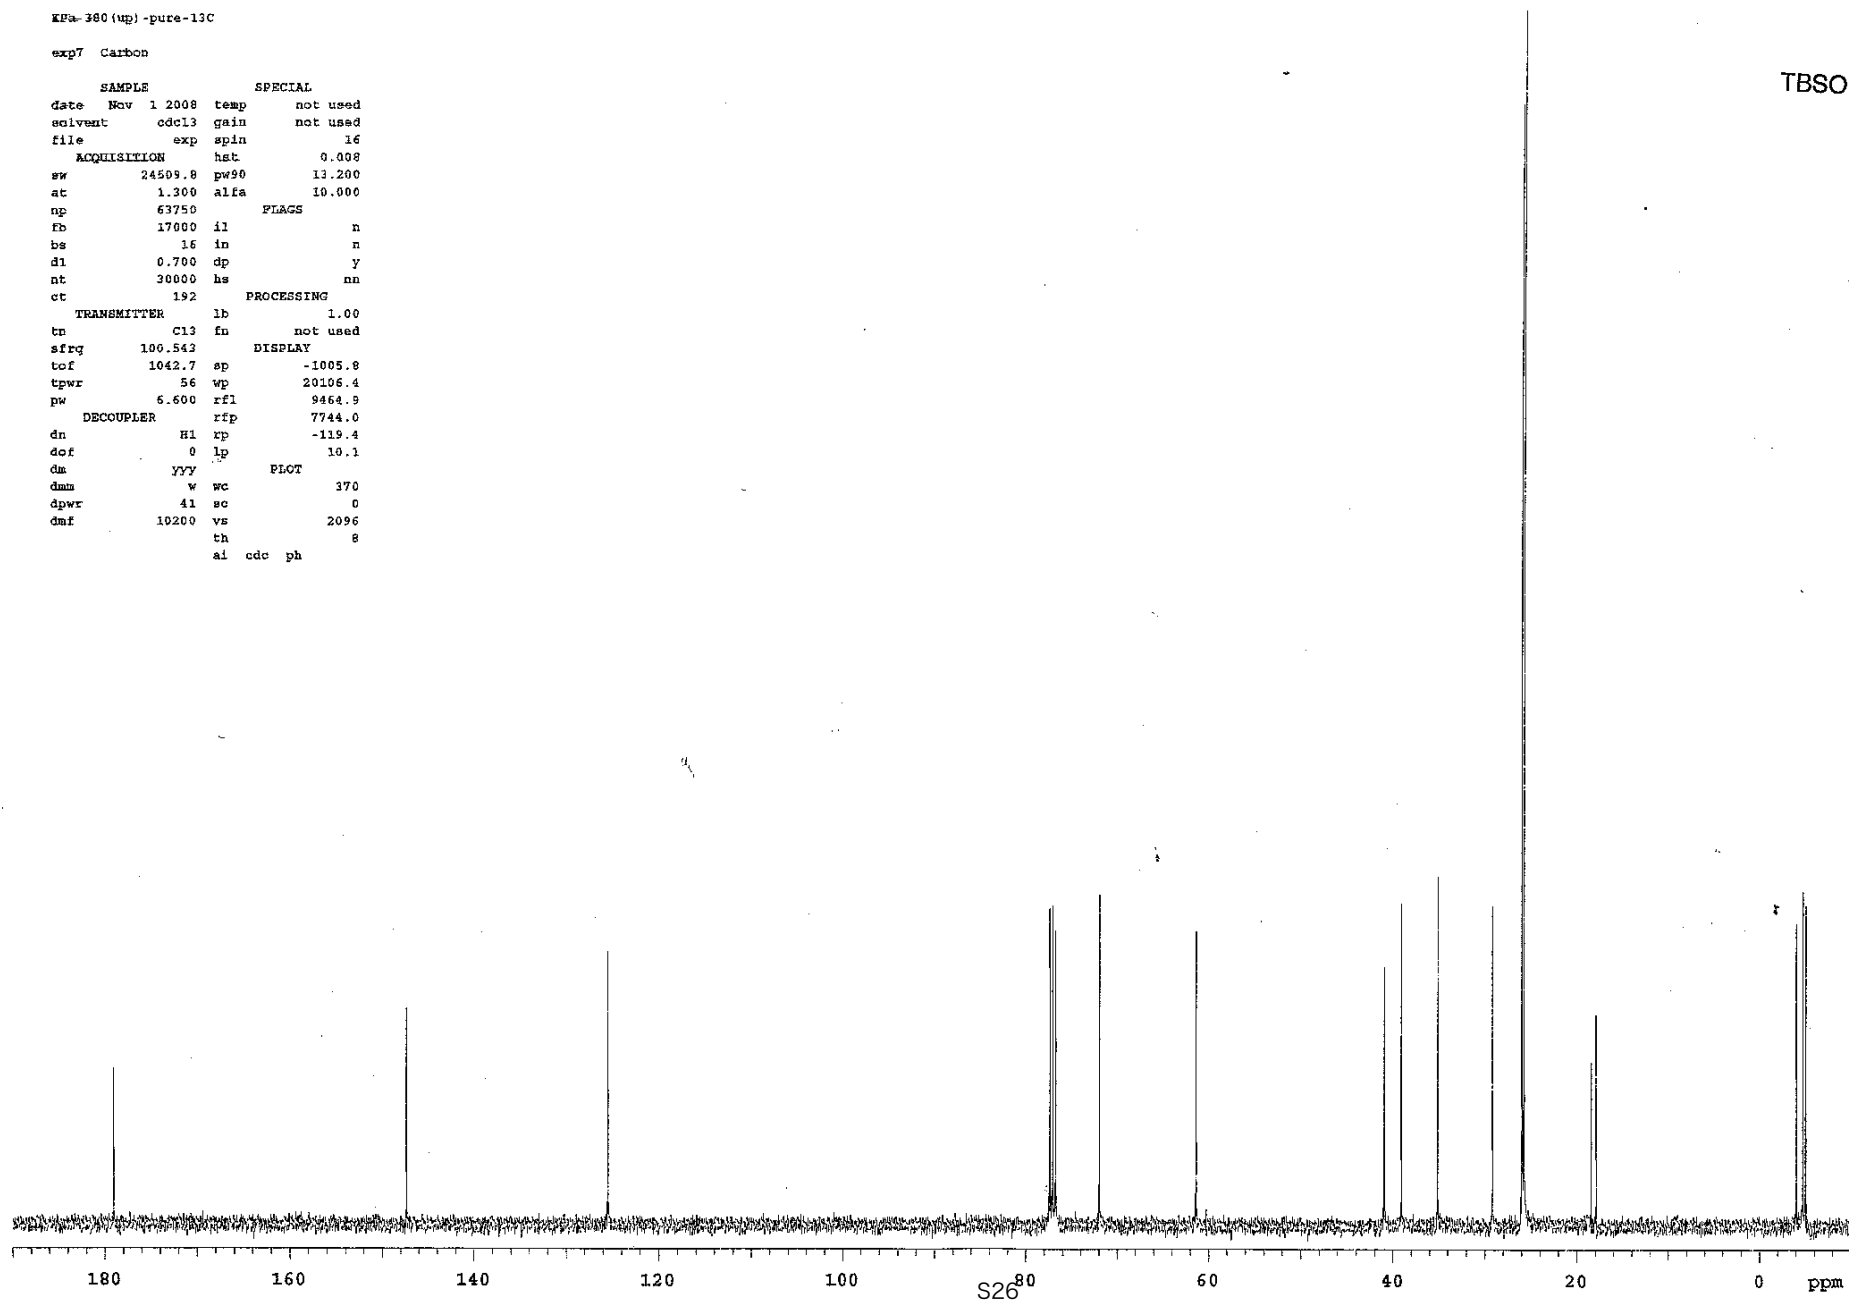





Ref. proton

exp7 Proton

| SAMPLE      |            | SPECIAL    |          |
|-------------|------------|------------|----------|
| date        | Nov 9 2008 | temp       | not used |
| solvent     | cdcl3      | gain       | not used |
| file        | exp        | spin       | 16       |
| ACQUISITION |            | ht         | 0.008    |
| sw          | 6410.3     | pw90       | 12.500   |
| at          | 3.500      | alfa       | 10.000   |
| ny          | 44872      | PULSES     |          |
| fb          | 4000       | ii         | n        |
| bs          | 4          | in         | n        |
| dl          | 1.500      | dp         | y        |
| nt          | 300000     | hs         | nn       |
| ct          | 44         | PROCESSING |          |
| TRANSMITTER |            | fn         | not used |
| tn          | q1         | DISPLAY    |          |
| afrq        | 399.814    | sp         | -199.9   |
| taf         | 399.5      | wp         | 3558.1   |
| tpwr        | 59         | rfl        | 804.0    |
| pw          | 6.250      | rfp        | 0        |
| DECOUPLER   |            | rp         | 68.5     |
| dr          | c13        | lp         | 7.3      |
| dof         | 0          | PLOT       |          |
| dm          | nan        | wc         | 270      |
| dmm         | c          | ac         | 0        |
| dpwr        | 37         | vs         | 1042     |
| daf         | 29412      | th         | 12       |
|             | ai         | cdc        | ph       |

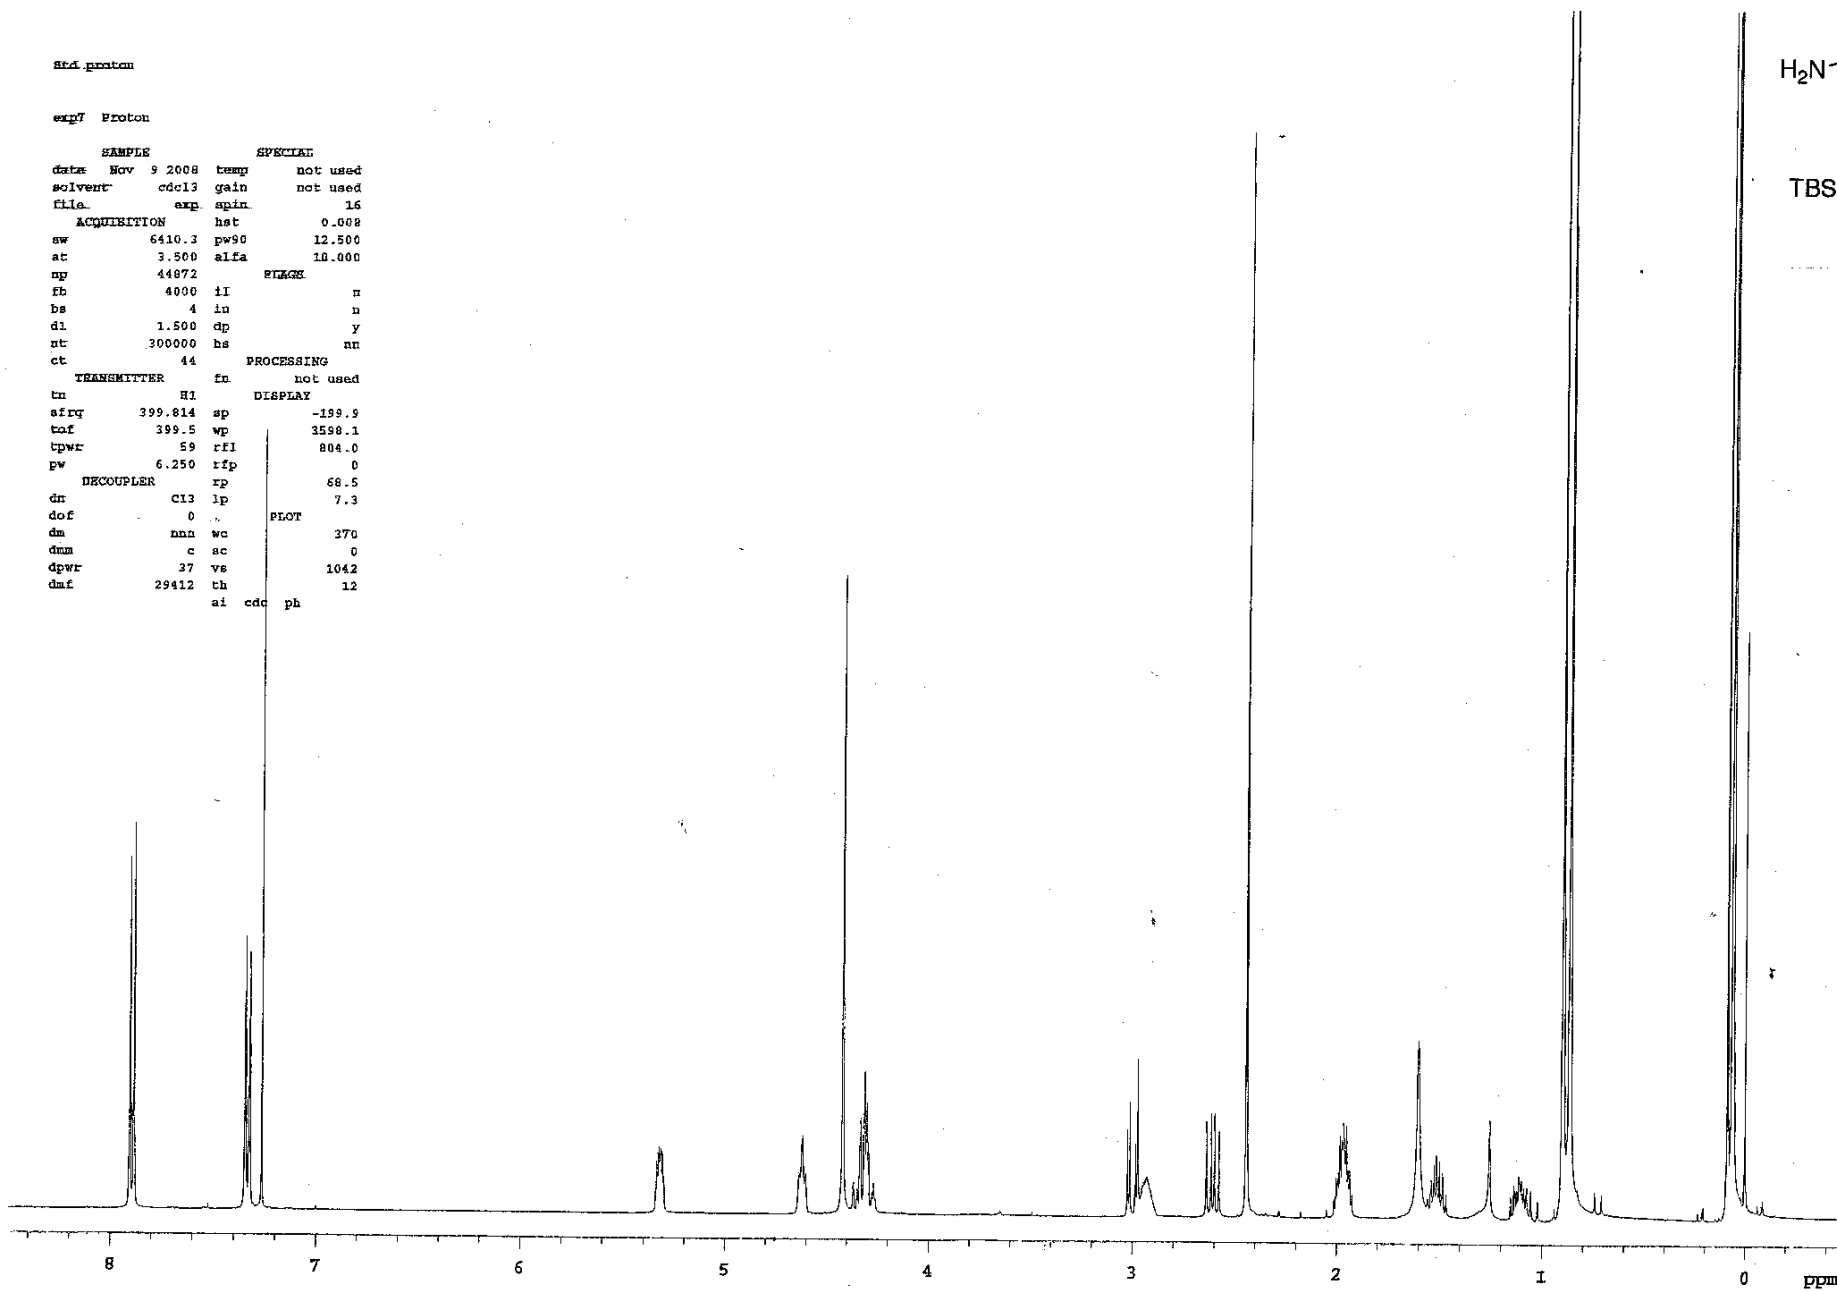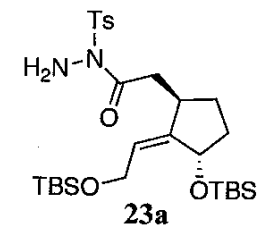

RF-386-down-down

exp5 Carbon

| SAMPLE      |            | SPECIAL    |          |
|-------------|------------|------------|----------|
| date        | Nov 7 2008 | temp       | not used |
| solvent     | cdcl3      | gain       | not used |
| file        | exp        | spin       | 16       |
| ACQUISITION |            | hst        | 0.008    |
| sw          | 24509.8    | pw90       | 13.200   |
| at          | 1.300      | alfa       | 10.000   |
| ap          | 63750      | FLAGE      |          |
| fb          | 17600      | ii         | r        |
| ba          | 16         | in         | n        |
| dl          | 0.700      | dp         | y        |
| nt          | 30000      | hs         | nn       |
| ct          | 272        | PROCESSING |          |
| TRANSMITTER |            | lb         | 1.00     |
| tn          | C13        | fn         | not used |
| sfrq        | 100.543    | DISPLAY    |          |
| tof         | 1042.7     | sp         | -1005.8  |
| tpwl        | 56         | wp         | 20106.4  |
| pw          | 6.600      | rfl        | 9465.7   |
| DECOUPLER   |            | rEp        | 7744.0   |
| dx          | H1         | rp         | -135.2   |
| dot         | 0          | ip         | 62.5     |
| dm          | yyy        | FLGT       |          |
| dum         | w          | wc         | 370      |
| dpwr        | 41         | sc         | 0        |
| dmf         | 10200      | va         | 3682     |
|             |            | th         | 11       |
|             | ai         | cdc        | ph       |

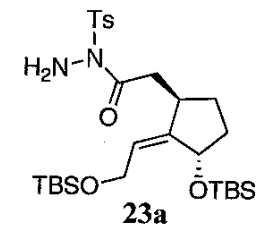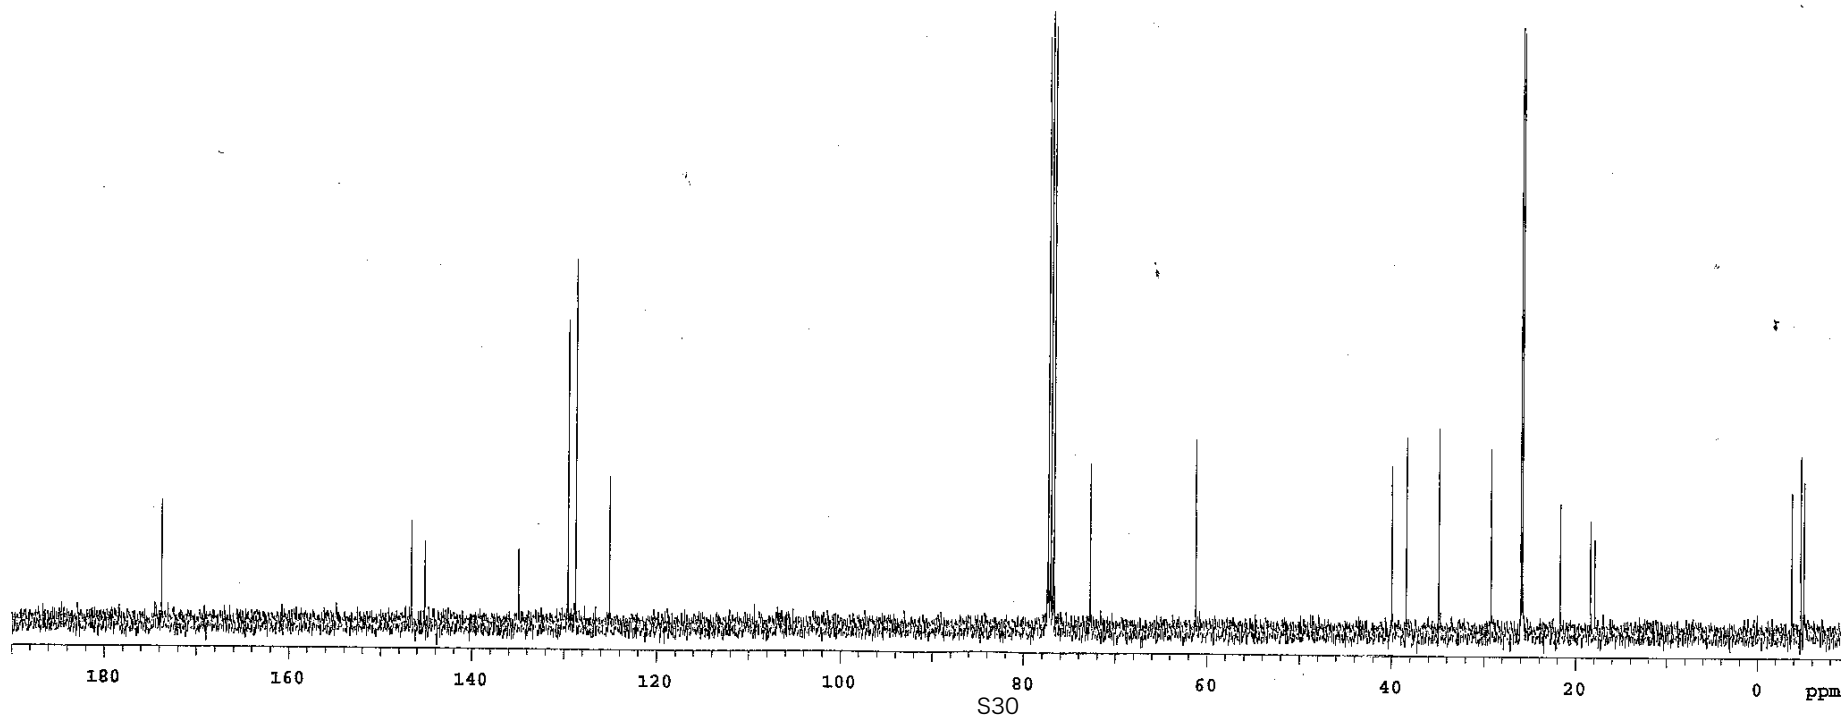

KEA-325-up-down-pure-1H

expH Proton

| SAMPLE      |            | SPECIAL    |          |
|-------------|------------|------------|----------|
| date        | Nov 9 2008 | temp       | not used |
| solvent     | cdcl3      | gain       | not used |
| file        | exp        | spin       | 1f       |
| ACQUISITION |            | hst        | 0.008    |
| sw          | 6410.3     | pw90       | 12.500   |
| at          | 3.500      | alfa       | 10.000   |
| ny          | 44872      | FNAME      |          |
| fb          | 4000       | ii         | n        |
| ba          | 4          | in         | n        |
| dl          | 1.500      | dp         | y        |
| nt          | 12000      | hs         | nn       |
| ct          | 52         | PROCESSING |          |
| TRANSMITTER |            | fn         | not used |
| tn          | H1         | DISPLAY    |          |
| afiq        | 399.814    | sp         | -199.9   |
| tof         | 399.5      | wp         | 3598.1   |
| tpwr        | 59         | rfl        | 803.8    |
| pw          | 6.250      | rtp        | 0        |
| DECOUPLER   |            | rp         | 70.4     |
| dn          | C13        | lp         | 4.2      |
| dof         | 0          | FLOT       |          |
| dm          | nan        | wc         | 370      |
| dmm         | c          | ac         | 0        |
| dpwr        | 37         | vs         | 734      |
| dmf         | 29412      | th         | 12       |
|             | ai         | cdc        | ph       |

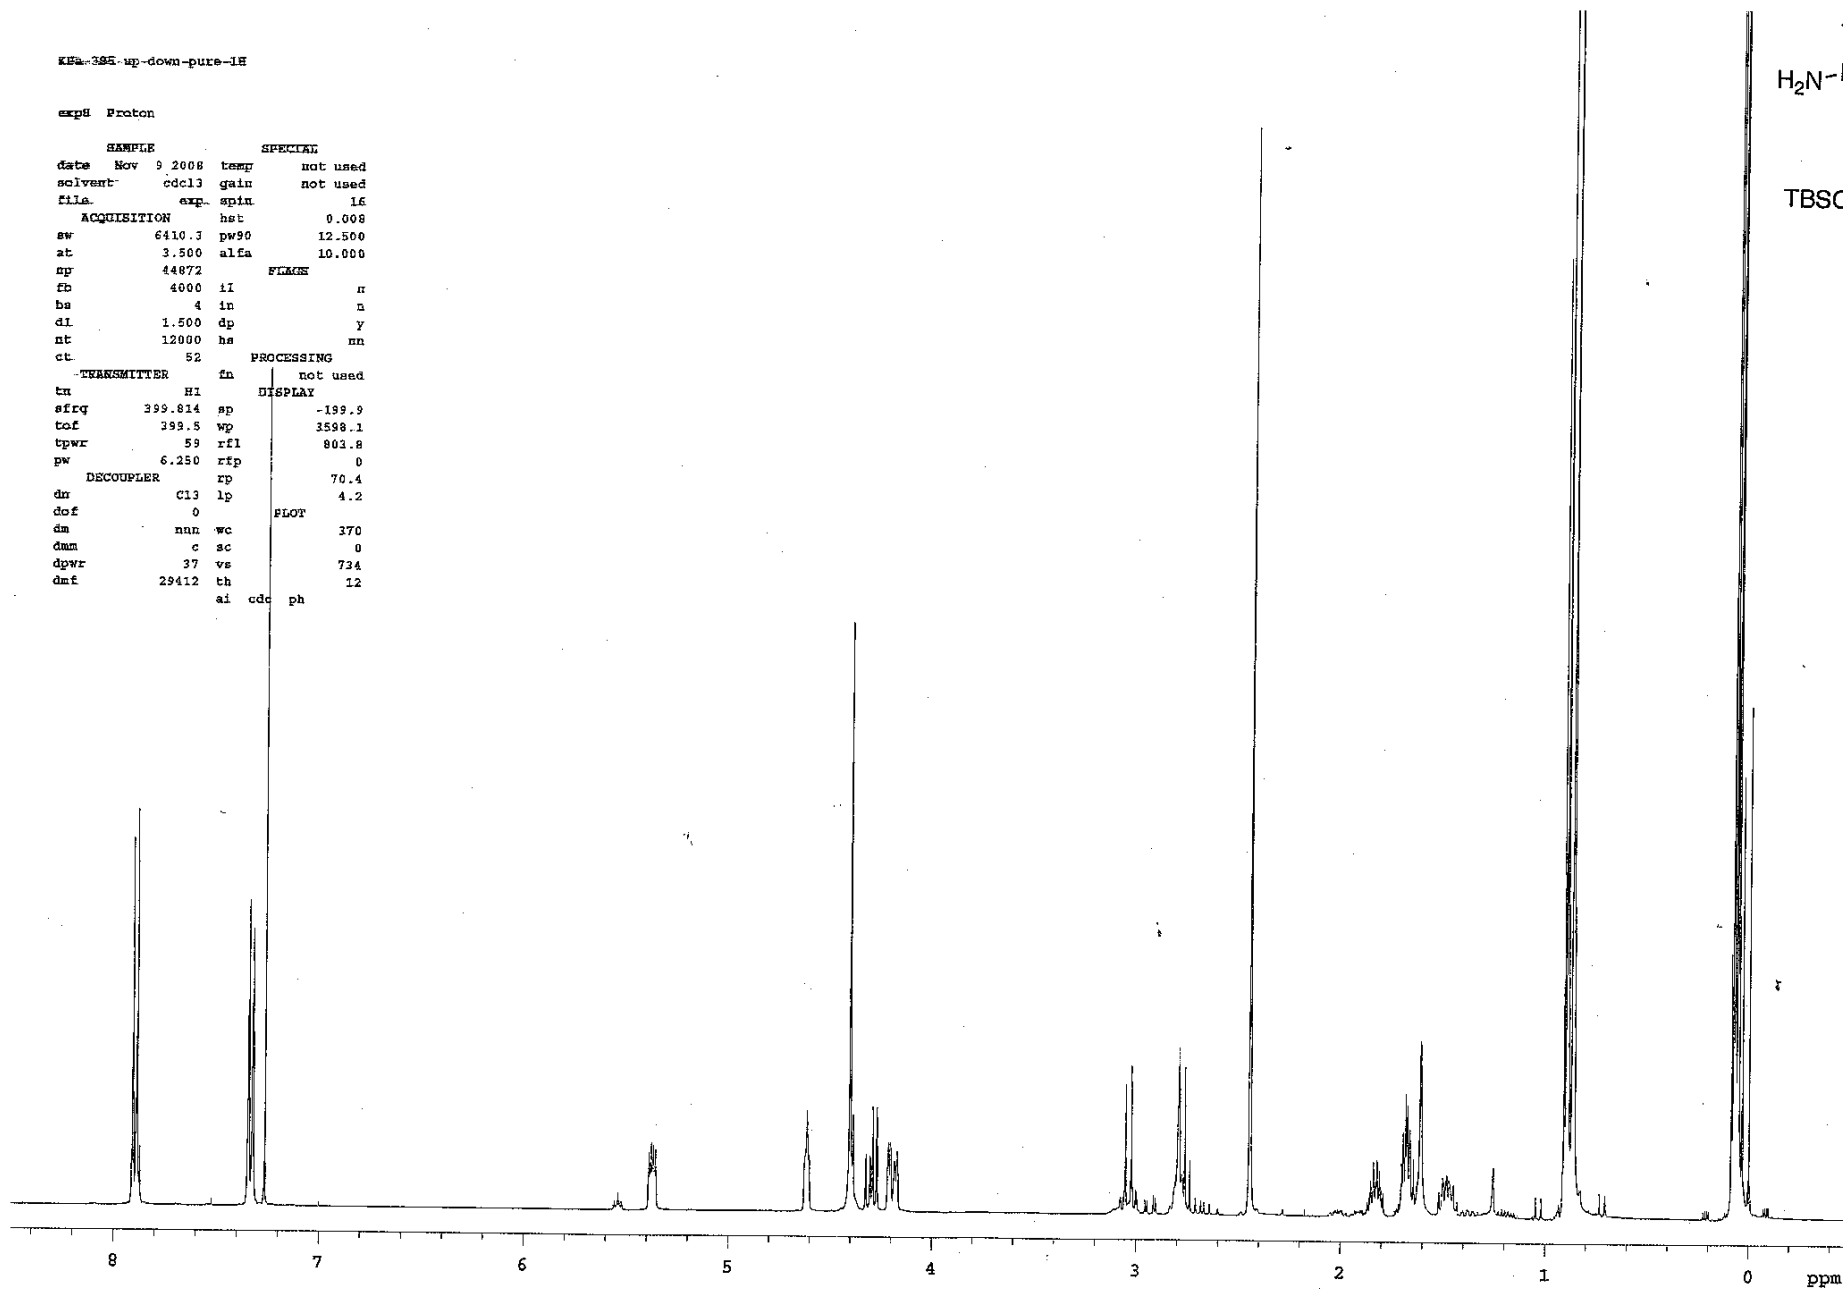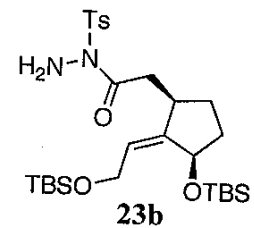

KW 185 up-down

exp7 Carbon

| SAMPLE      |            | SPECIAL    |          |
|-------------|------------|------------|----------|
| date        | Nov 7 2008 | temp       | not used |
| solvent     | cdcl3      | gain       | not used |
| file        |            | exp        | spin 16  |
| ACQUISITION |            | hst        | 0.008    |
| sw          | 24509.8    | pw90       | 11.200   |
| at          | 1.300      | alfa       | 10.000   |
| np          | 53750      | FLAGS      |          |
| fb          | 17500      | ti         | n        |
| bs          | 16         | in         | n        |
| dl          | 0.700      | dp         | y        |
| nt          | 30000      | hs         | nn       |
| ct          | 0          | PROCESSING |          |
| TRANSMITTER |            | lb         | 1.00     |
| tn          | Cl3        | fn         | not used |
| sfrq        | 100.543    | DISPLAY    |          |
| tof         | 1042.7     | sp         | -1005.6  |
| tpwr        | 56         | wp         | 20106.4  |
| pw          | 6.600      | rfl        | 1699.0   |
| DECOUPLER   |            | rfp        | 0        |
| dn          | H1         | rp         | -119.6   |
| dof         | 0          | lp         | 24.8     |
| dm          | YYY        | PLOT       |          |
| dum         | w          | wc         | 370      |
| dpwr        | 41         | sc         | 0        |
| dmf         | 10200      | vs         | 6235     |
|             |            | th         | 13       |
|             |            | ai         | cdc ph   |

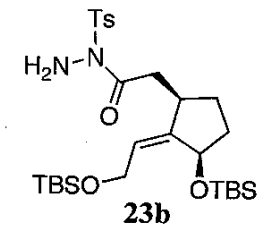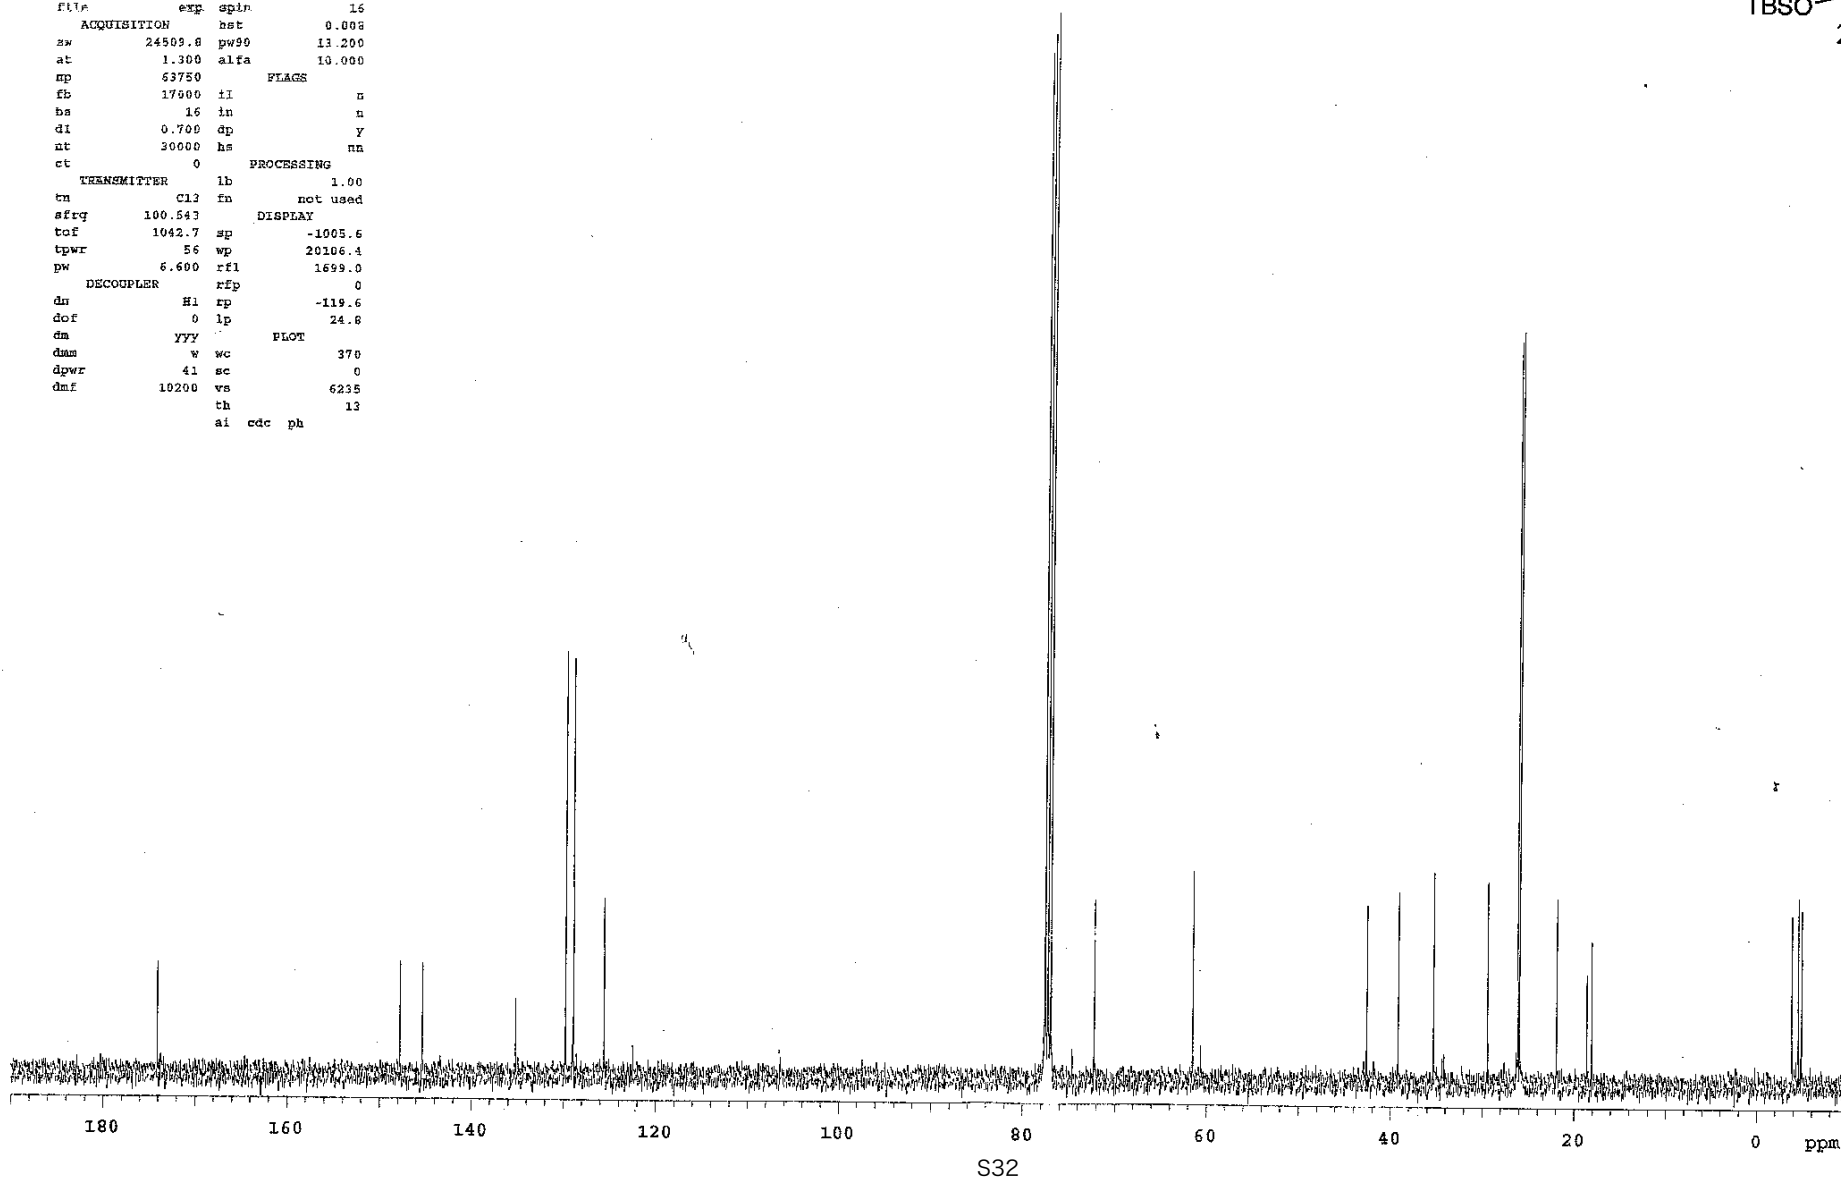



KPa-388-up-major-H

exp7 std1h

| SAMPLE      |             | DEC. & VT  |          |
|-------------|-------------|------------|----------|
| date        | Nov 11 2008 | dfrq       | 299.973  |
| solvent     | CDCl3       | dn         | H1       |
| file        | exp         | dpwr       | 30       |
| ACQUISITION |             | doF        |          |
| sfrq        | 299.973     | dm         | mm       |
| tn          | H1          | dmm        | c        |
| at          | 4.000       | dmf        | 200      |
| np          | 36036       | PROCESSING |          |
| sw          | 4504.5      | wtfile     |          |
| fb          | 2600        | proc       | ft       |
| bs          | 4           | fn         | not used |
| tpwr        | 63          |            |          |
| pw          | 4.0         | werr       |          |
| d1          | 1.000       | wexp       | wft      |
| tof         | 0           | wbs        | wft      |
| nt          | 100000      | wat        |          |
| ct          | 32          |            |          |
| alock       | n           |            |          |
| gain        | not used    |            |          |
| FLAGS       |             |            |          |
| il          | n           |            |          |
| in          | n           |            |          |
| dp          | y           |            |          |
| DISPLAY     |             |            |          |
| sp          | -30.1       |            |          |
| wp          | 2999.7      |            |          |
| vs          | 207         |            |          |
| sc          | 0           |            |          |
| wc          | 370         |            |          |
| hzmm        | 8.11        |            |          |
| is          | 1414.10     |            |          |
| rfl         | 796.9       |            |          |
| rfp         | 0           |            |          |
| th          | 20          |            |          |
| ins         | 100.000     |            |          |
| nm          | cdc ph      |            |          |

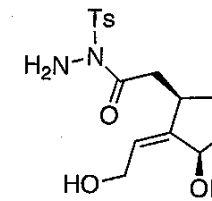

24a

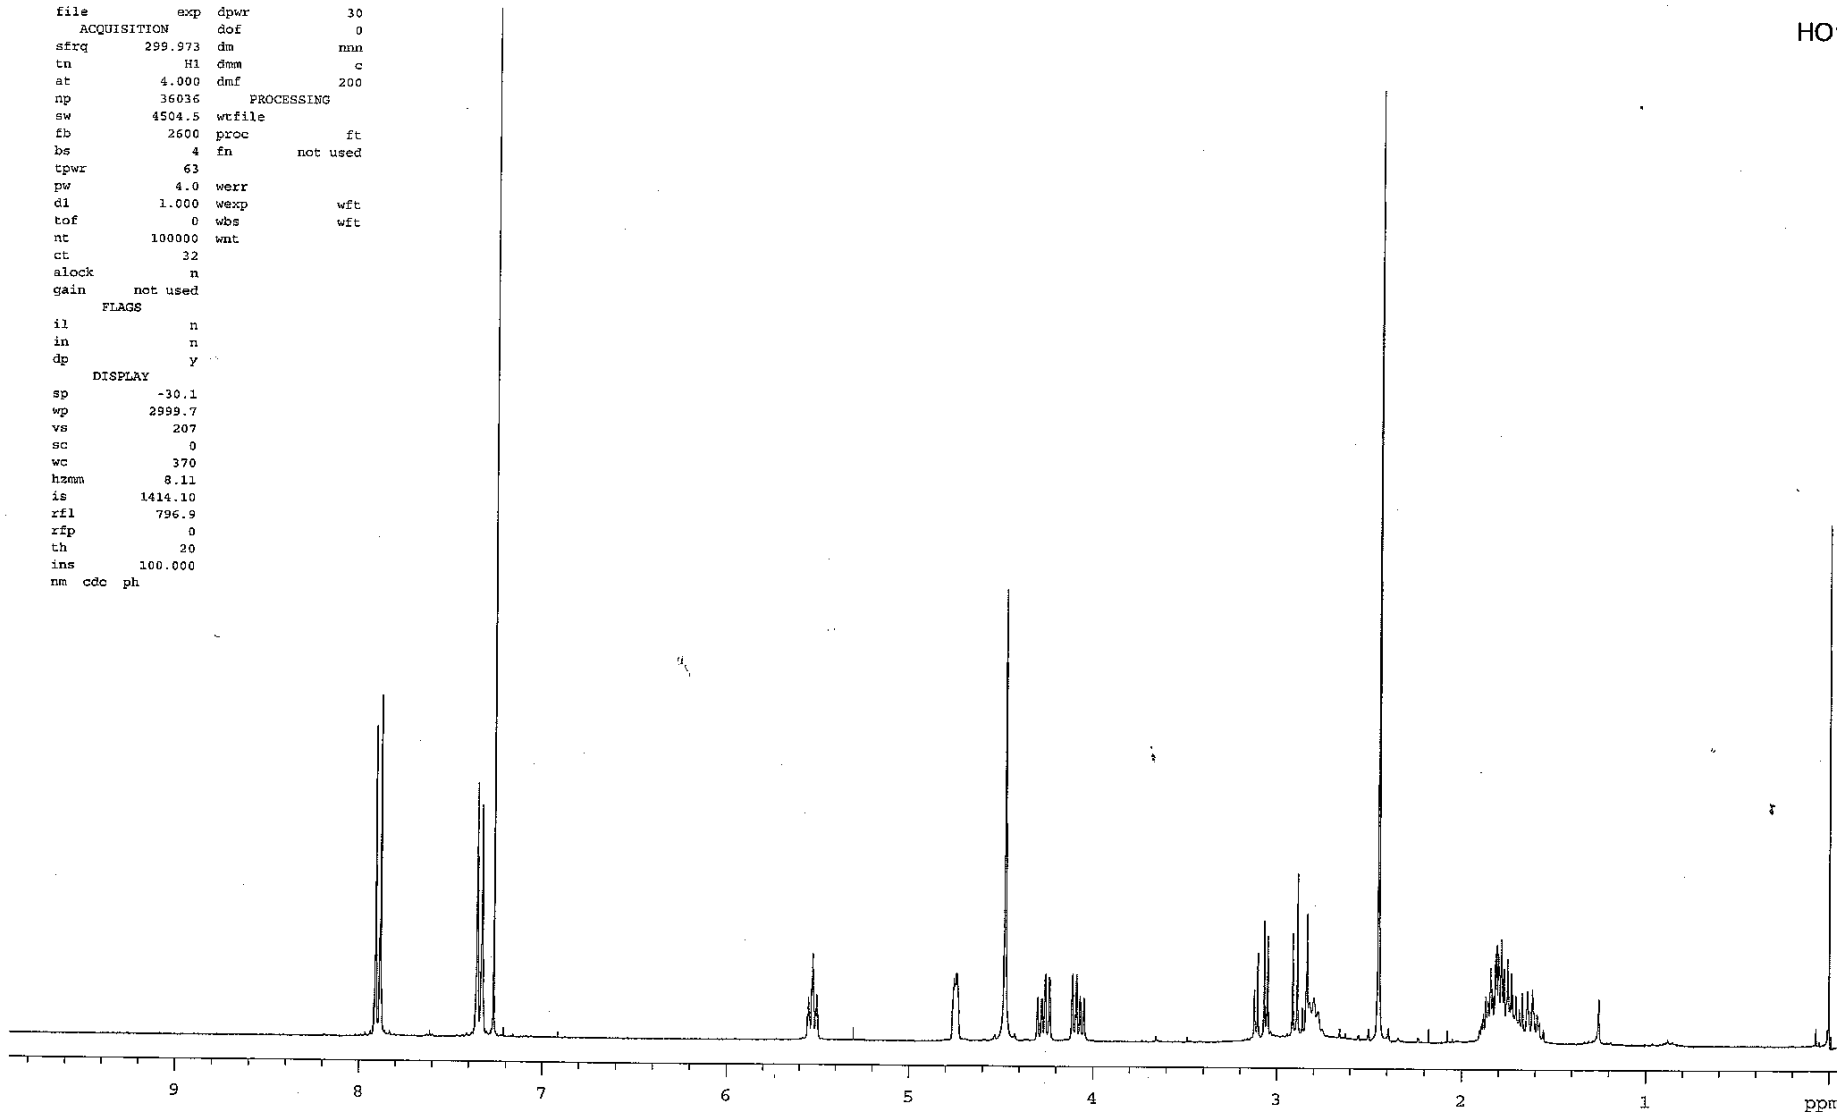

KPa-up-major-C

exp7 std13c

```
SAMPLE          DEC. & VT
date  Nov 11 2008  dfrq      299.973
solvent  CDCl3      dn        H1
file     exp       dpwr      39
ACQUISITION      dof        0
sfrq     75.435    dm         YYY
tn       C13      dmm        W
at       1.815    dmf        11000
np       68106    PROCESSING
sw       18761.7  lb         2.00
fb       10400    wfile
bs       16      proc
lpwr     57      fn         not used
pw       8.7
dl       0      warr
tof      0      wexp      wft
nt       100000  wbs       wft
ct       2208   wat
alock    n
gain     not used

FLAGS
il       n
in       n
dp       y

DISPLAY
sp       21.6
wp       15053.0
vs       143
sc       0
wc       370
hzmm     40.68
ls       500.00
rfl      7659.7
rfp      5810.2
th       10
ins      100.000
nm no ph
```

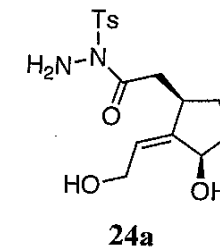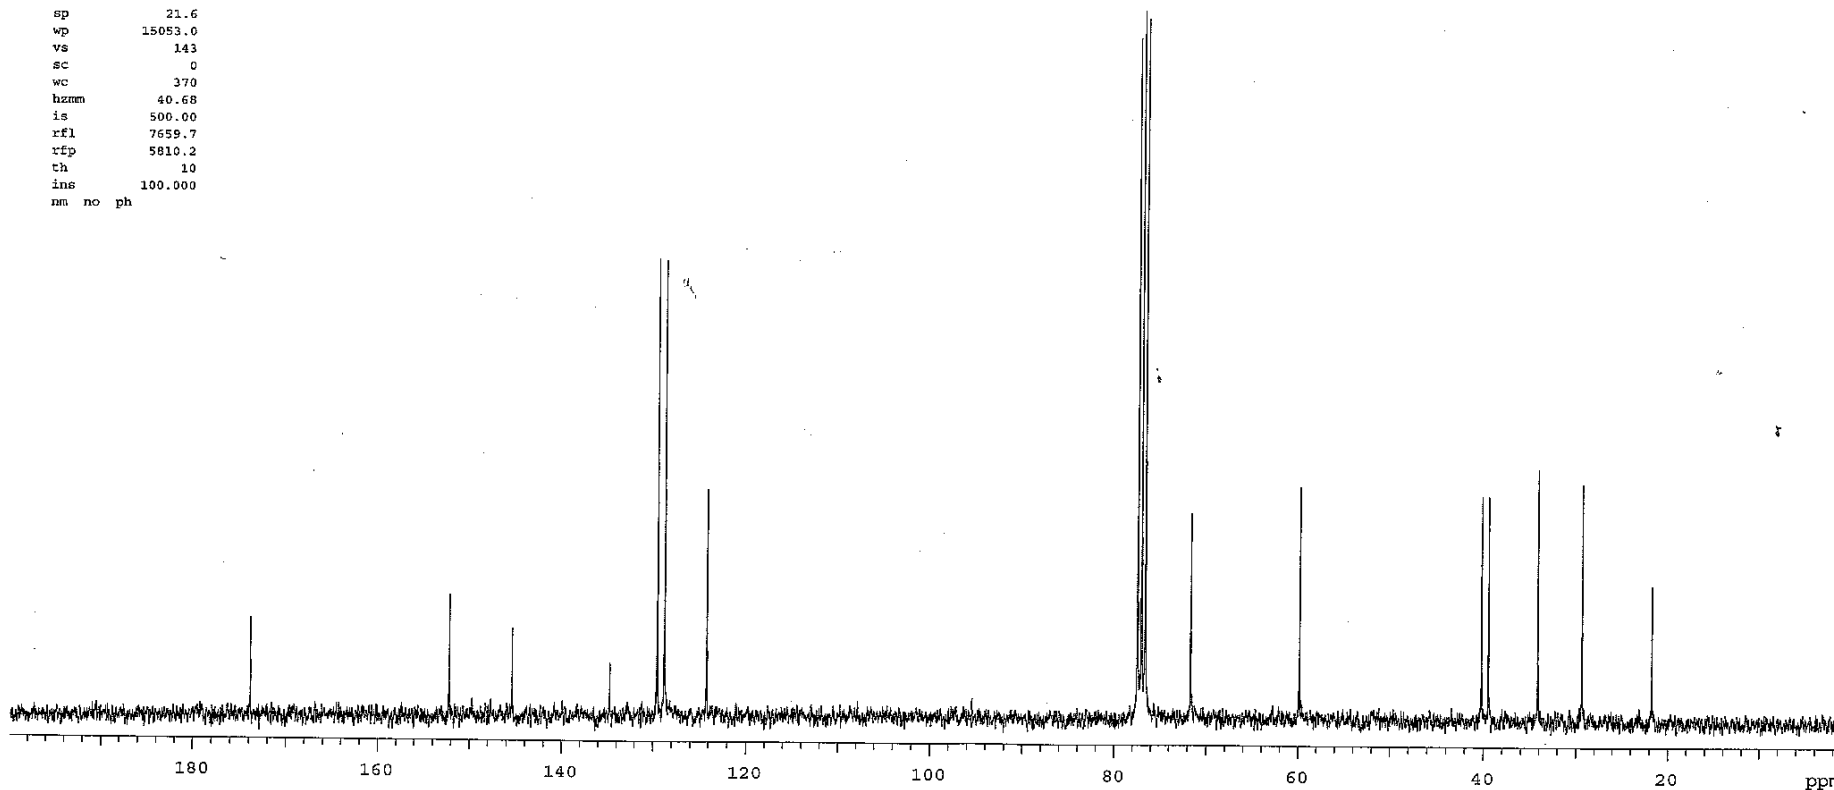

KPa-389-down-H

exp7 std1h

```
SAMPLE          DEC. & VT
date Nov 12 2008 dfrq      299.973
solvent CDCl3  dn         H1
file      exp  dpwr       30
ACQUISITION    dof       0
sfrq      299.973 dm      nnn
tn         H1  dnm       c
at         4.000 dmf      200
np         36036          PROCESSING
sw         4504.5 wfile
fb         2600  proc     ft
bs         4  fn      not used
tpwr       63
pw         4.0  werr
d1         1.000 wexp     wft
tof        0  wbs     wft
nt        100000 wnt
ct         44
alock      n
gain      not used

FLAGS
il         n
in         n
dp         y

DISPLAY
sp         -30.1
wp         2999.7
vs         232
sc         0
wc         370
hnm       8.11
is        1071.43
rfl       797.0
rEp       0
th        20
ins       100.000
nm cdc ph
```

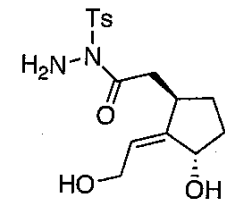

24b

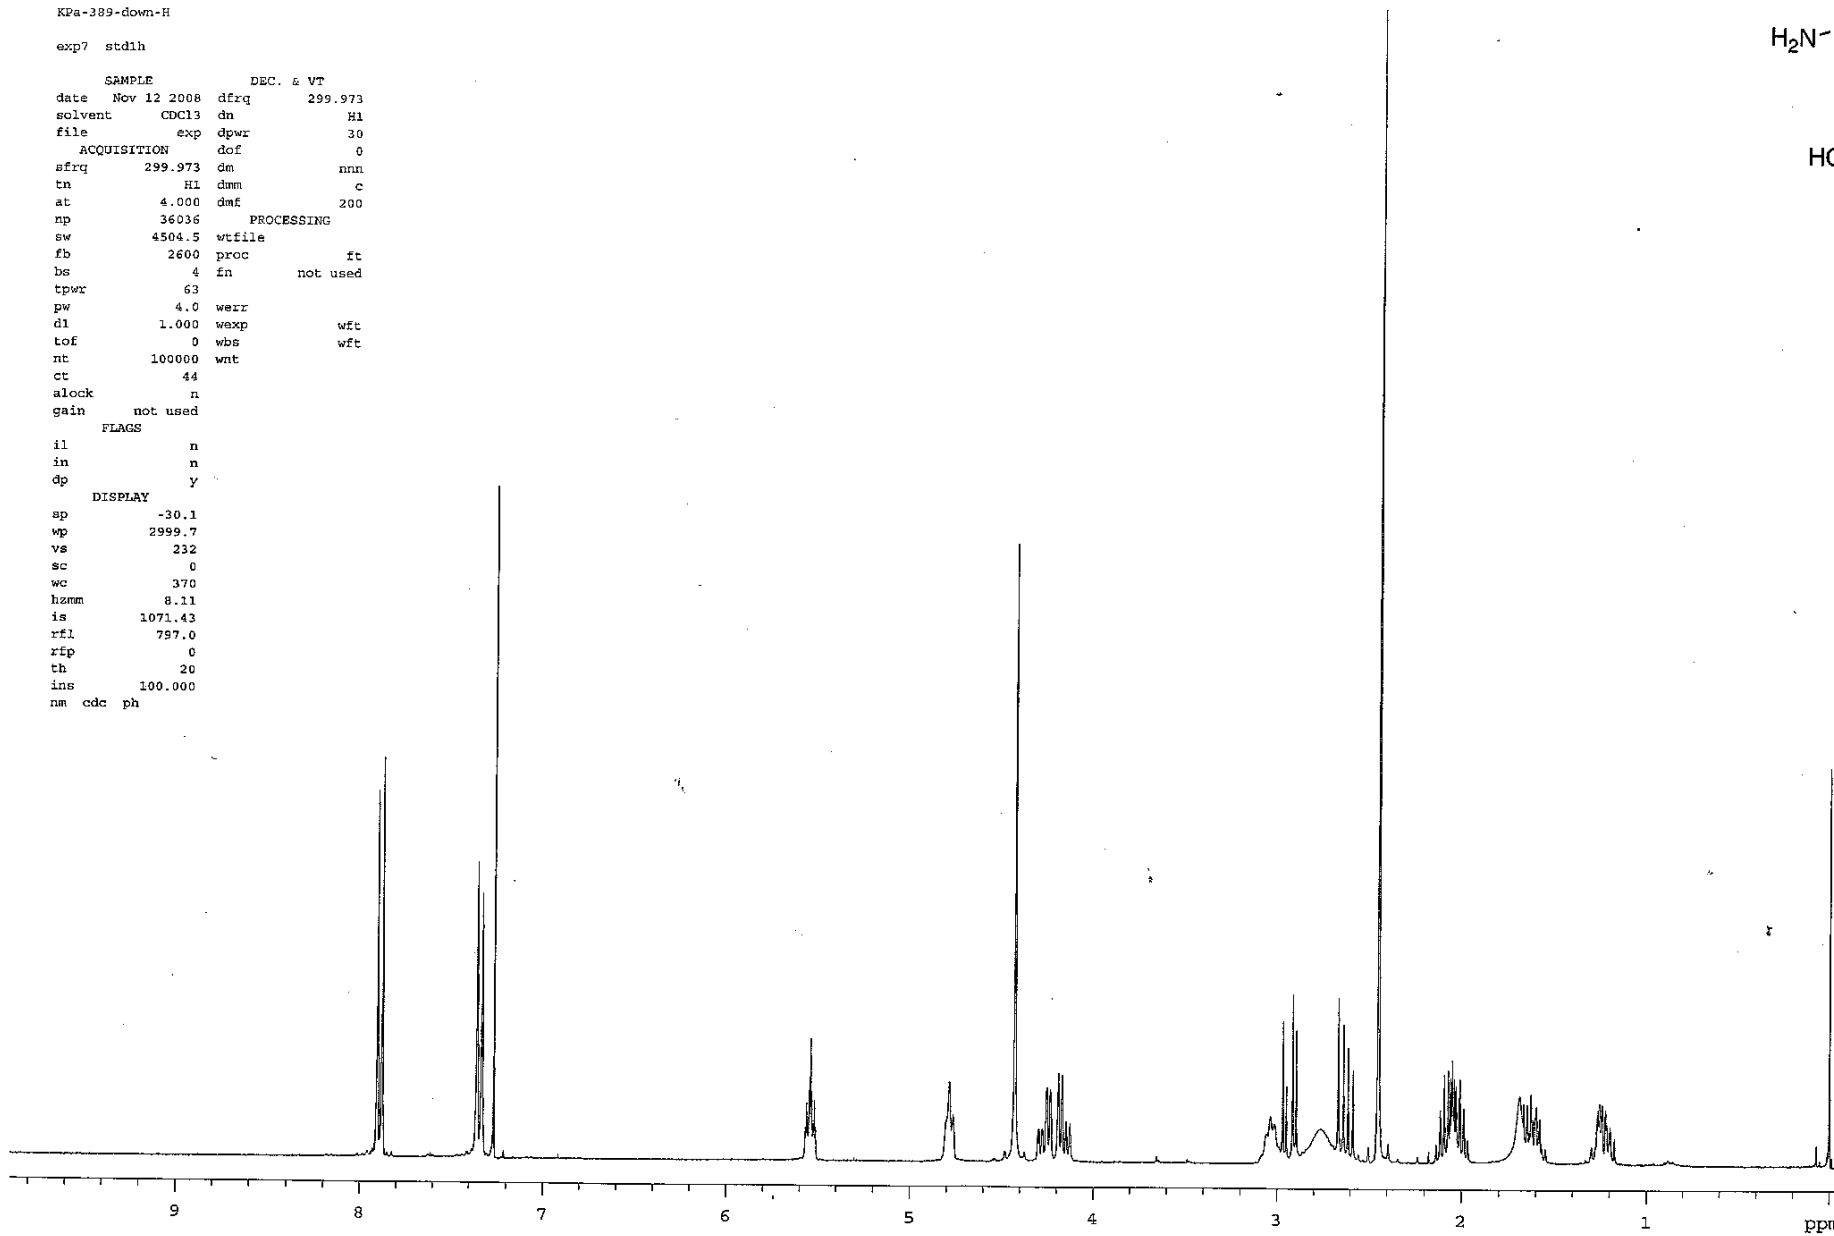

KEA-MS-13C

expl. Carbon

| SAMPLE      |             | SPECIALS   |          |
|-------------|-------------|------------|----------|
| date        | Nov 15 2008 | temp       | not used |
| solvent     | cdc13       | gain       | not used |
| file        | exp         | spin       | 16       |
| ACQUISITION |             | ht         | 0.008    |
| sw          | 24509.8     | pw90       | 13.200   |
| at          | 1.300       | alfa       | 10.000   |
| np          | 63750       | PLANS      |          |
| fn          | 17000       | ii         | rr       |
| hs          | 16          | in         | n        |
| dl          | 0.700       | dp         | Y        |
| nt          | 30000       | hs         | nn       |
| ct          | 896         | PROCESSING |          |
| TRANSMITTER |             | lb         | 1.00     |
| tn          | CI3         | fn         | not used |
| sfrq        | 100.543     | DISPLAY    |          |
| taf         | 1042.7      | sp         | -50.7    |
| tpwr        | 56          | wp         | 20106.4  |
| pw          | 6.600       | rfl        | 9466.4   |
| DECOUPLER   |             | rfp        | 7744.0   |
| dr          | H1          | rp         | -130.9   |
| dof         | 0           | lp         | 34.7     |
| dm          | YYY         | ELOT       |          |
| dmm         | w           | wc         | 370      |
| dpwr        | 41          | sc         | 0        |
| dmf         | 10200       | vs         | 5983     |
|             |             | th         | 12       |
|             |             | ai         | cdc ph   |

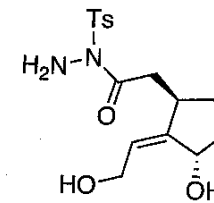

24b

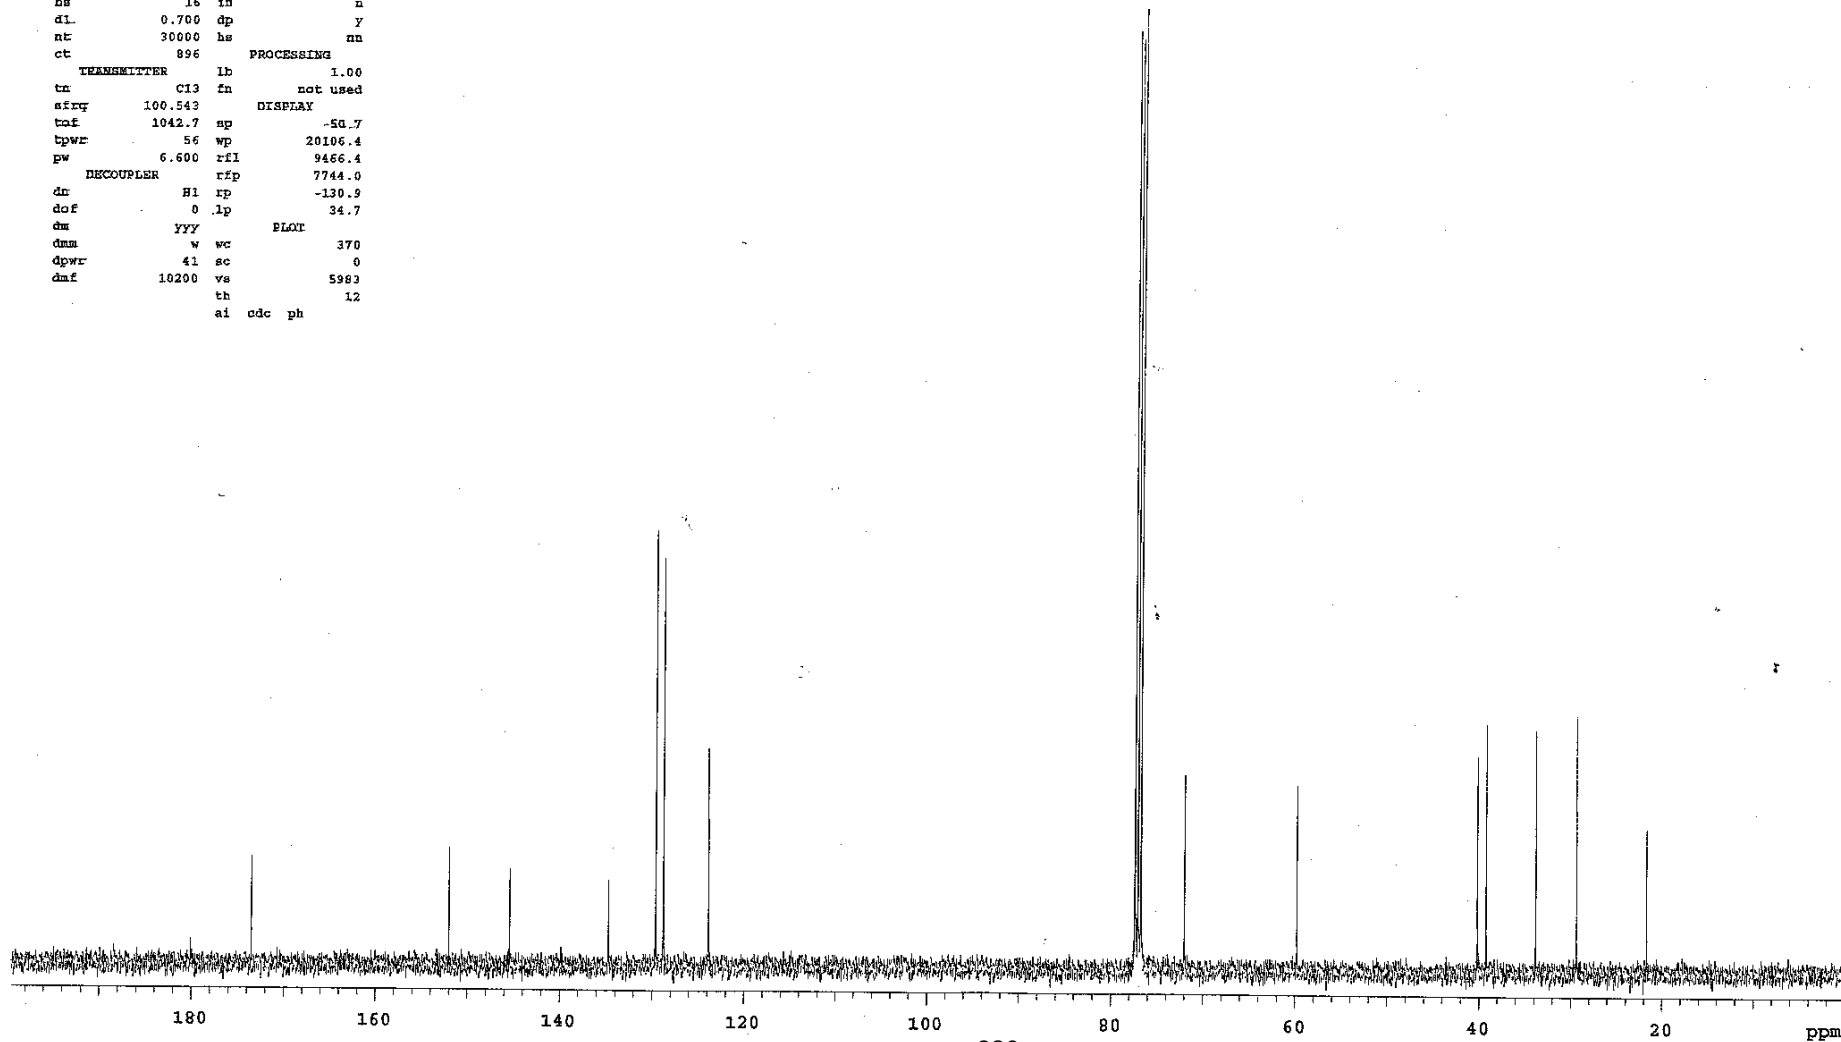

S36

KPa-360-up-1H-pure

exp1 Fracton

| SAMPLE      |            | SPECIAL    |          |
|-------------|------------|------------|----------|
| date        | Oct 4 2008 | temp       | not used |
| solvent     | cdcl3      | gain       | not used |
| file        | exp        | spin       | 16       |
| ACQUISITION |            | FLAGS      |          |
| sw          | 6410.3     | pw90       | 12.500   |
| at          | 3.500      | alfa       | 10.000   |
| up          | 44872      |            |          |
| fb          | 4000       | il         | n        |
| bs          | 4          | in         | n        |
| dl          | 1.500      | dp         | y        |
| nt          | 12000      | hs         | an       |
| ct          | 40         | PROCESSING |          |
| tn          | H1         | fn         | not used |
| TRANSMITTER |            | DISPLAY    |          |
| sfreq       | 399.814    | sp         | -40.1    |
| toaf        | 399.5      | wp         | 1998.0   |
| tpwr        | 59         | rfl        | 804.8    |
| pw          | 6.250      | rfp        | 0        |
| DECOUPLER   |            | PLOT       |          |
| dn          | C13        | lp         | 8.0      |
| dof         | 0          |            |          |
| dm          | nnn        | wc         | 170      |
| dmm         | c          | ac         | 0        |
| dpwr        | 37         | vs         | 459      |
| dmf         | 29412      | th         | 12       |
|             | al         | cdc        | ph       |

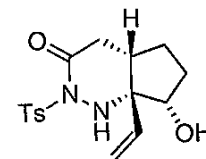

25a

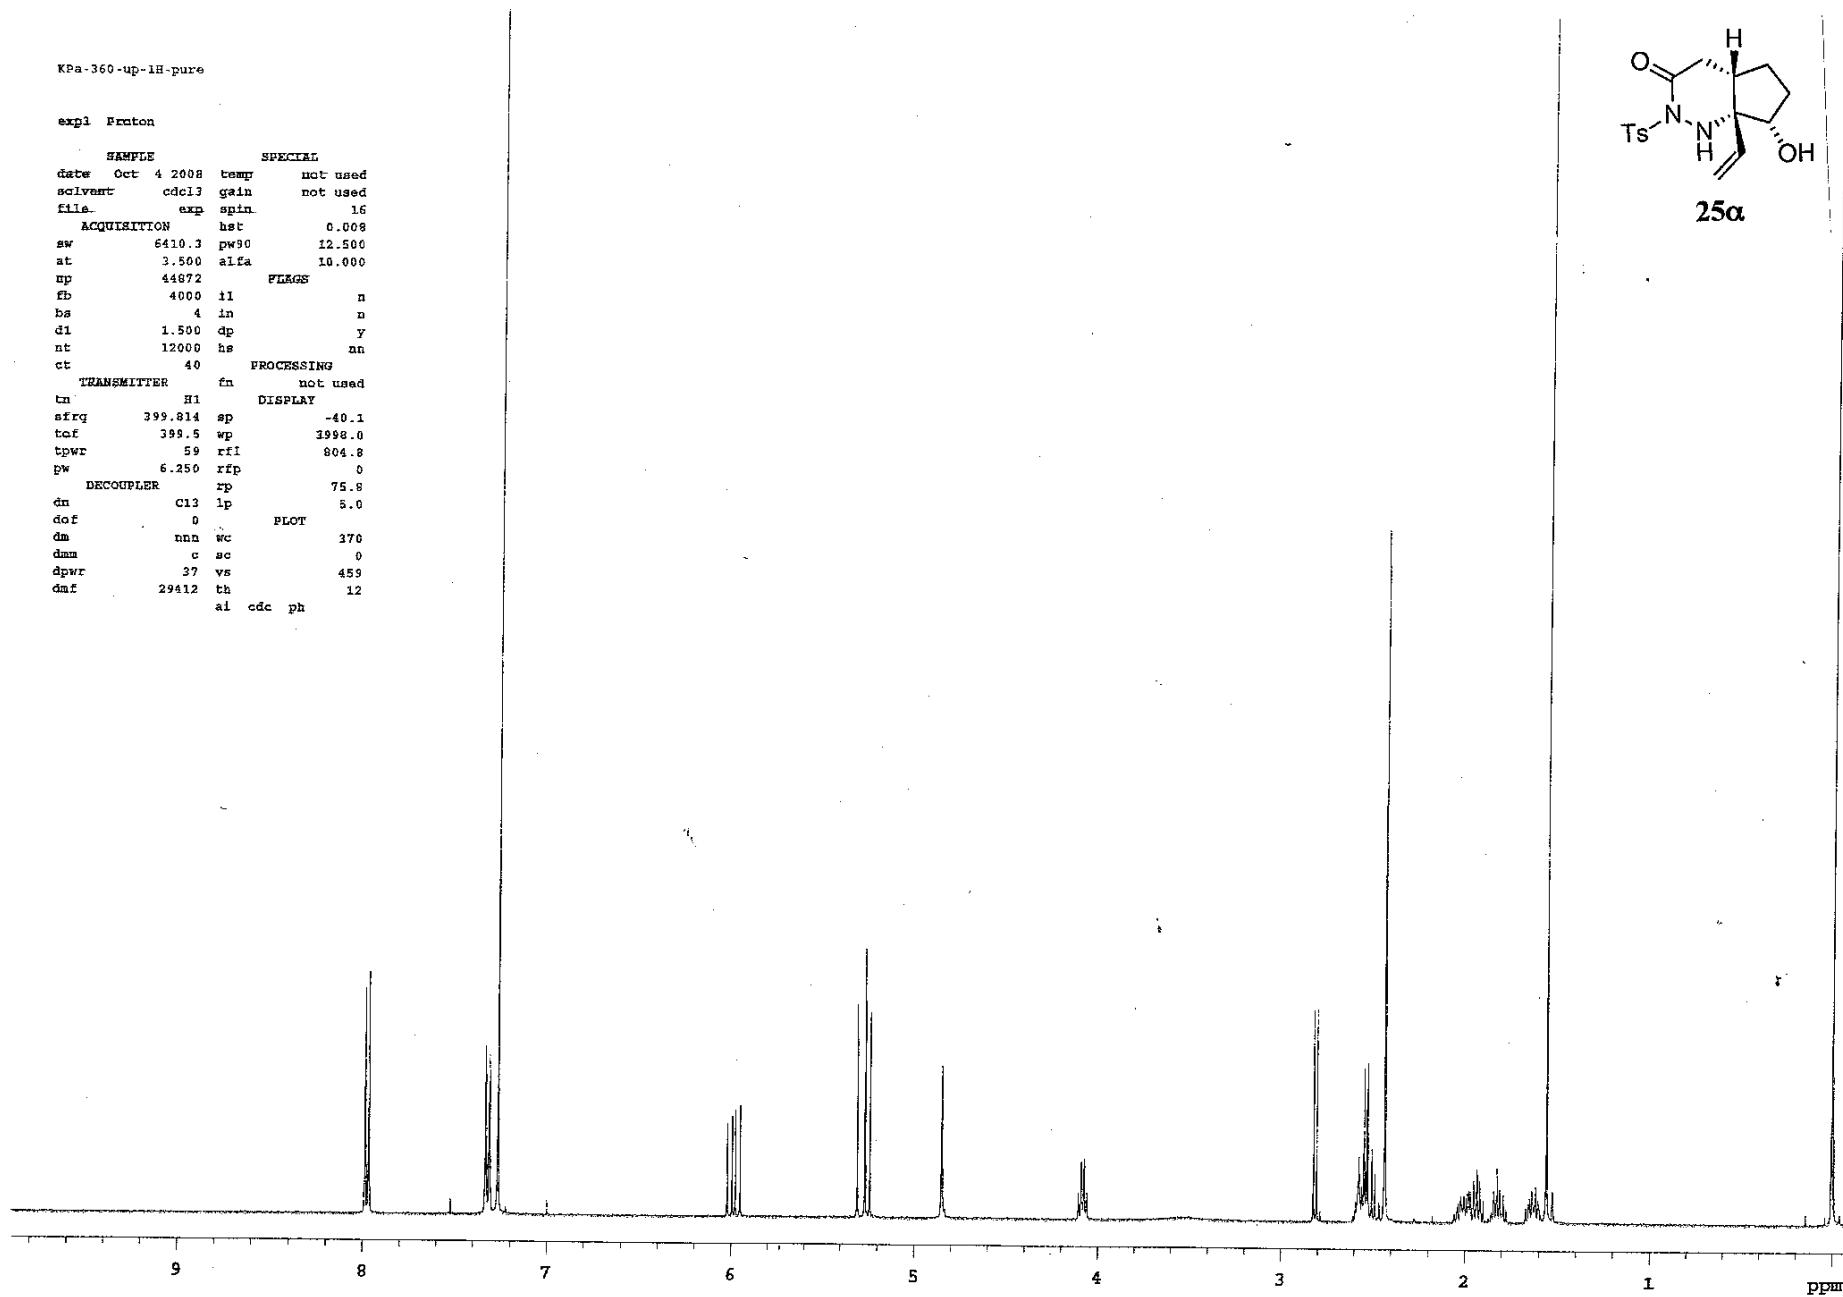

Kpa-360-up-13C-pure

exp4 Carbon

| SAMPLE      |            | SPECIAL    |          |
|-------------|------------|------------|----------|
| date        | Oct 4 2008 | temp       | not used |
| solvent     | cdcl3      | gain       | not used |
| file        | exp        | spin       | 16       |
| ACQUISITION |            | FLAGS      |          |
| sw          | 24509.8    | pw90       | 13.200   |
| at          | 1.300      | alfa       | 10.000   |
| np          | 63750      |            |          |
| fb          | 17000      | ij         | n        |
| bs          | 16         | in         | n        |
| d1          | 0.700      | dp         | Y        |
| nt          | 30000      | hs         | nn       |
| ct          | 14352      | PROCESSING |          |
| TRANSMITTER |            | lb         | 1.00     |
| tn          | C13        | fn         | not used |
| afreq       | 100.543    | DISPLAY    |          |
| tof         | 1042.7     | sp         | -417.9   |
| tpwr        | 56         | wp         | 18517.7  |
| pw          | 6.600      | rfl        | 9464.9   |
| DECOUPLER   |            | rfd        | 7744.0   |
| dn          | H1         | rp         | -108.9   |
| dof         | 0          | lp         | -29.6    |
| dm          | yyy        | PLOT       |          |
| dmm         | w          | wc         | 370      |
| dpwr        | 41         | sc         | 0        |
| dnr         | 10200      | vs         | 33366    |
|             |            | th         | 10       |
|             |            | ai         | cdc ph   |

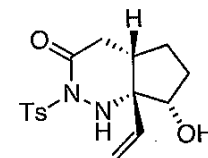

25a

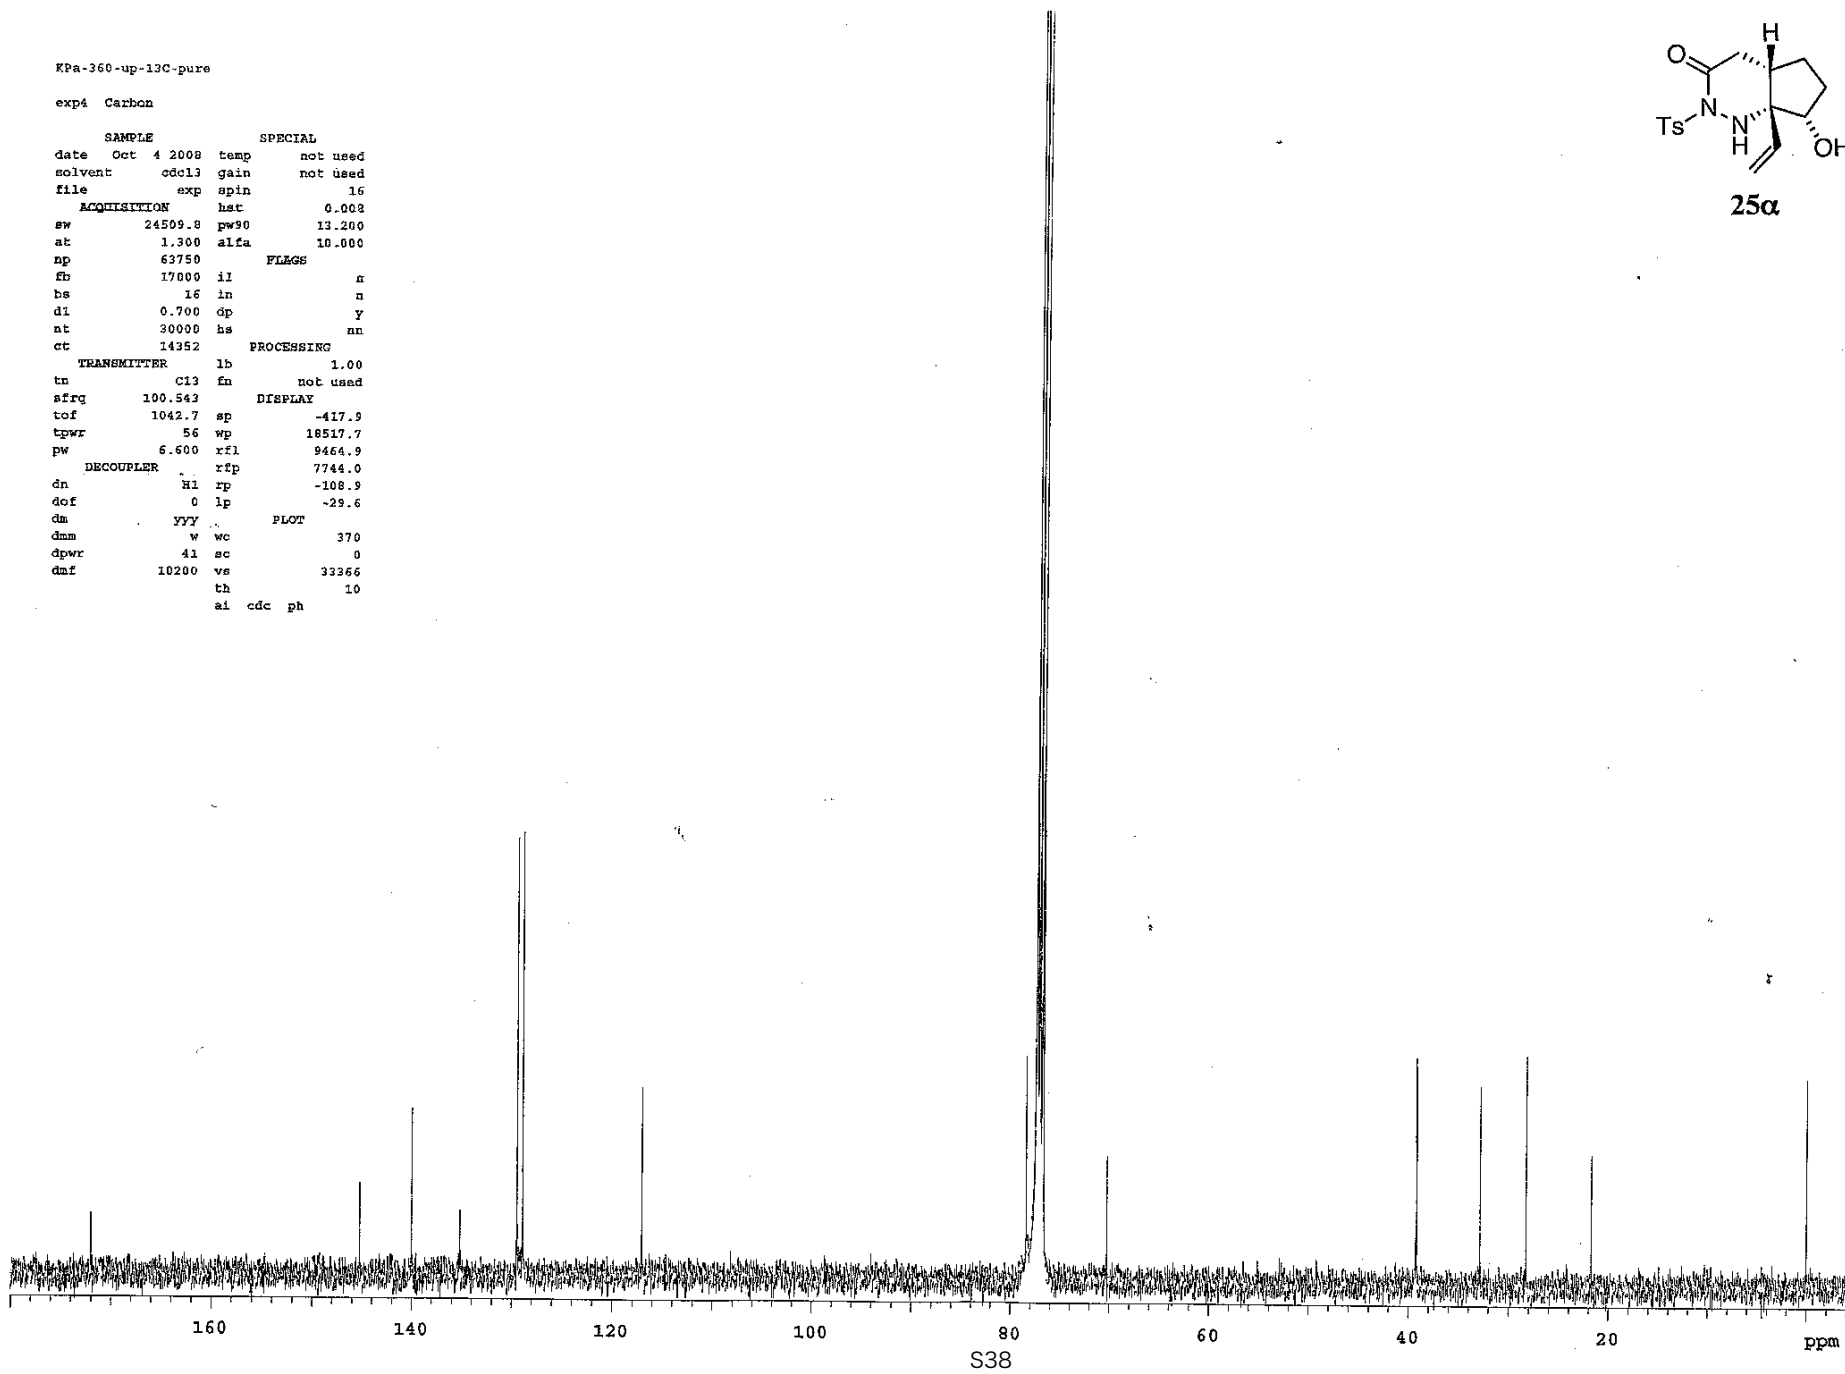

KPa-227-down

expl s2pul

```
SAMPLE          DEC. & VT
date Mar 7 2008  dirq 599.963
solvent CDCl3    dn      H1
file /export/home/- dpwr 46
vnmr1/vnmrsys/data- dof  0
/nishizawa6/kpa227- dm   nnn
down_1h.fid     dnm     c
ACQUISITION     dmf     11600
sfrq 599.963    dseq
tn    H1        drez    1.0
at    3.641     homo    n
np    65536     temp    25.0
sw    9000.9    PROCESsing
fb    5000     wtfile
bs    4        proc
tpwr  57       fn      65536
pw    10.3     math    f
dl    1.359
tof   -600.0   werr
nt    32       wexp
ct    32       wbs
alock n        wnt
gain  56
FLAGS
il    n
in    n
dp    y
hs    nn
DISPLAY
sp    374.1
wp    4799.5
vs    212
sc    0
wc    400
hzmm  12.00
ls    1663.56
rfl   745.0
rfp   0
th    7
ins   100.000
nm    ph
```

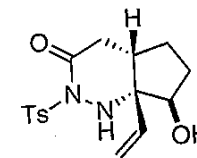

25β

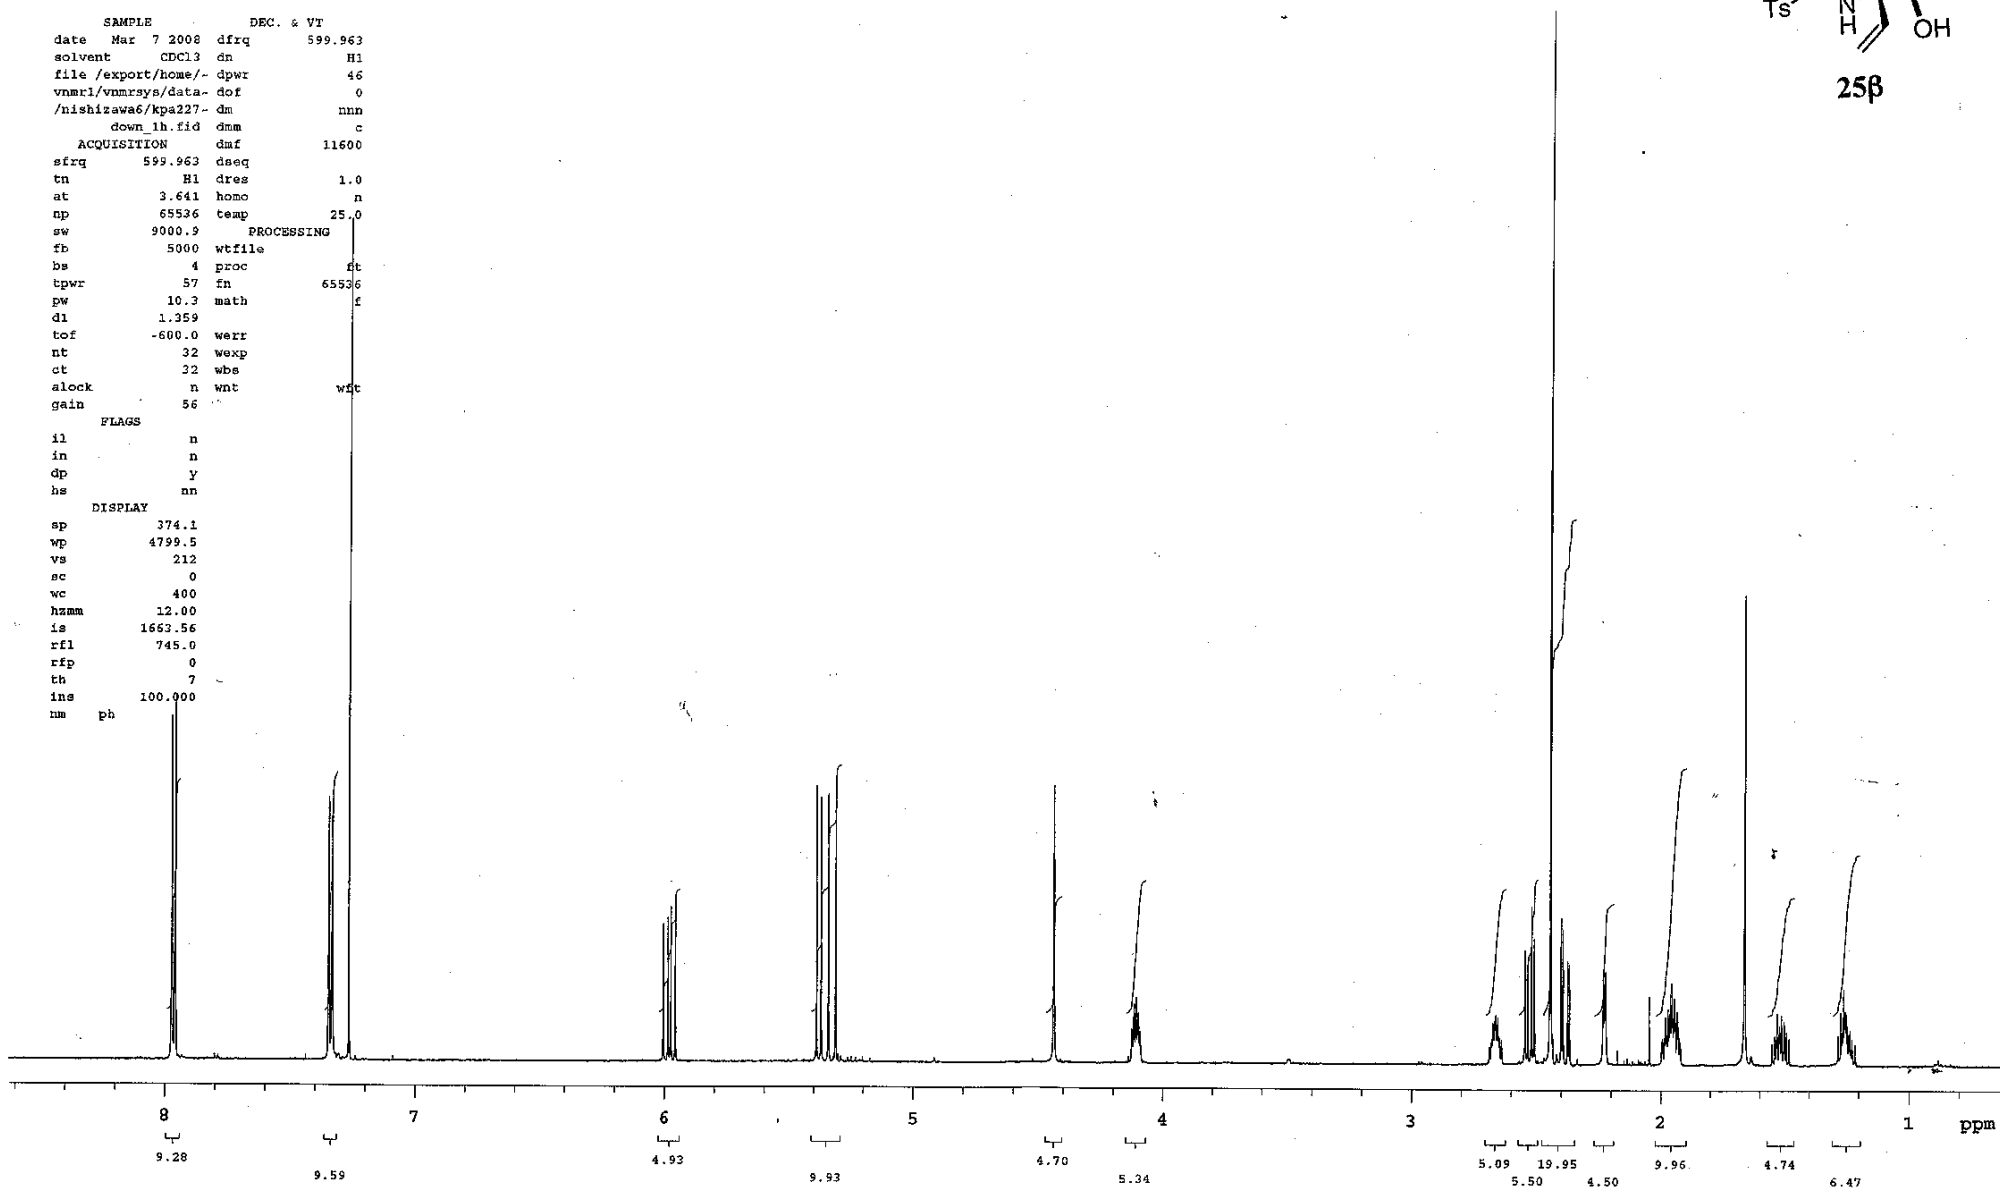

13C OBSERVE

Pulse Sequence: s2pul

Solvent: CDCl3  
Ambient temperature  
Mercury-300 "m300"

PULSE SEQUENCE

Relax. delay 0.294 sec  
Pulse 40.0 degrees  
Acq. time 1.705 sec  
Width 18863.2 Hz  
608 repetitions  
OBSERVE C13, 75.4839462 MHz  
DECOUPLE H1, 300.1958432 MHz  
Power 38 dB  
continuously on  
WALTZ-16 modulated  
DATA PROCESSING  
Line broadening 1.0 Hz  
FT size 65536  
Total time 20 minutes

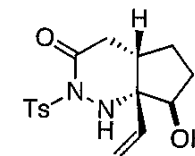

25β

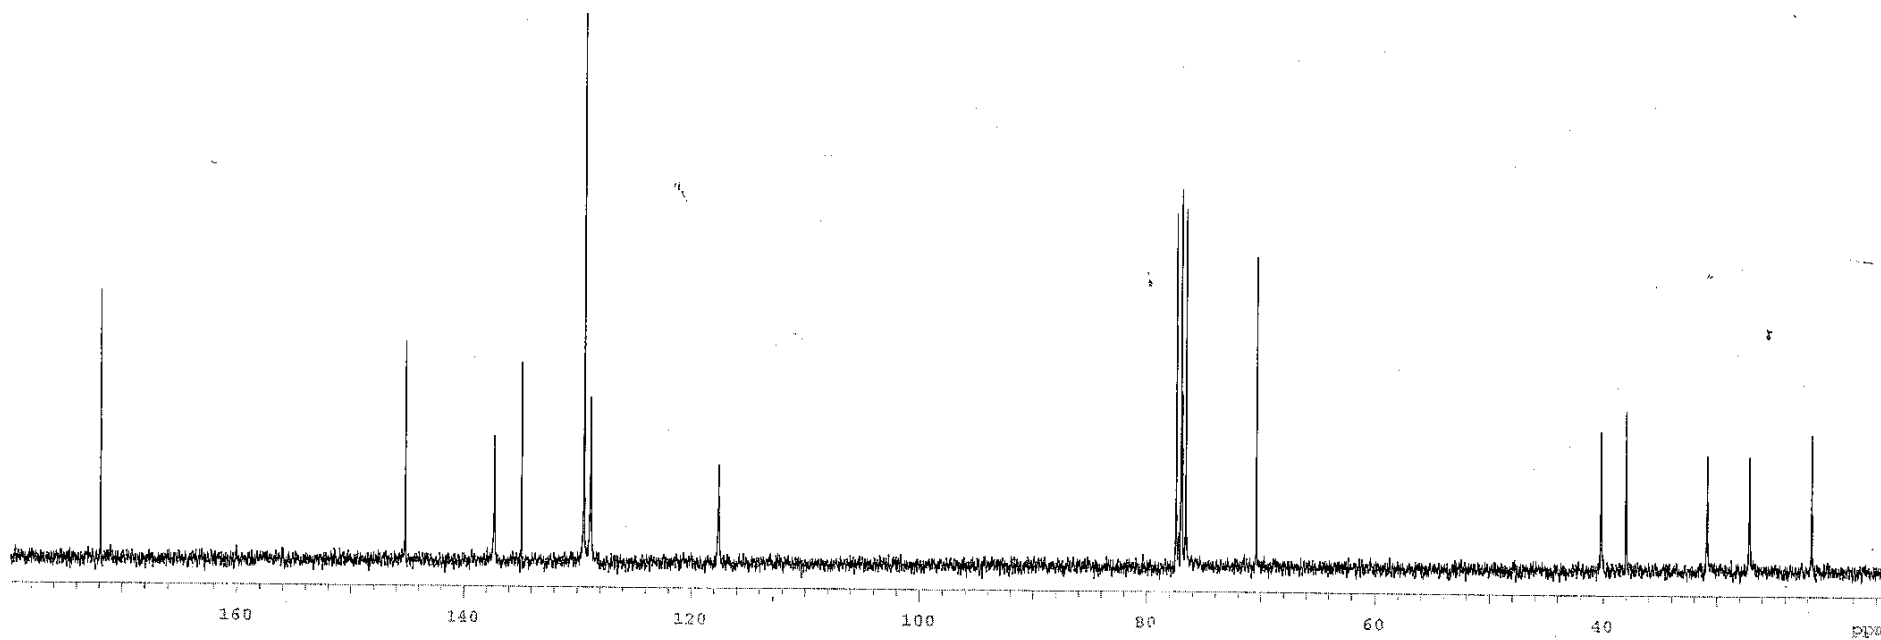



KPa-227-down

exp4 noesy

```
SAMPLE          DEC. & VT      ACQUISITION ARRAYS
date   Mar 7 2008   dfrq      599.963   array      phase
solvent   CDCl3   dn         H1       arraydim    256
file /export/home/- dpwr         45
vnmr1/vnmr3a/data- dof         0
/ntshizsws6/Kpa-227- dn         n         phase
down noesy.fid   dm         c         1
                                2         2
ACQUISITION
sfzq      599.961   cseq      12500
tn         H1   dres      1.0
at         0.170   homo     n
ap         2048   temp      25.0
sw         6024.1   PROCESSING
fb         3400   gf         0.079
bs         4       gfa     not used
ss         8       wtfile
tpwr      57     proc      ft
pw         14.0   fn         2048
dl         1.500   math     f
presat    0
mix       1.200   wvzz
tof       -2077.0 wvxp
nt        16     wbs
ct         8     wnt
alock     n     2D PROCESSING
gain      10    gfl     0.020
          FLAGS   gfl     not used
il        .y    wtfile1
in        n     procl   lp
dp        y     fnl     2048
hs        yn
sspul     y
2D ACQUISITION
sw1       6024.1
n1        128
phase     arrayed
DISPLAY
ap         597.0
wp        4316.4
vs        14500
sc         9
wc         270
hzma     16.00
is        33.57
xf1       733.8
rfp       0
ch        1
ins       100.000
ai        ph
2D DISPLAY
ap1       597.0
wp1       4316.4
sc2       0
wc2       210
xf11     733.8
rfp1     0
```

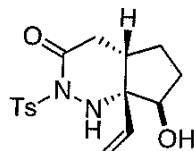

25β

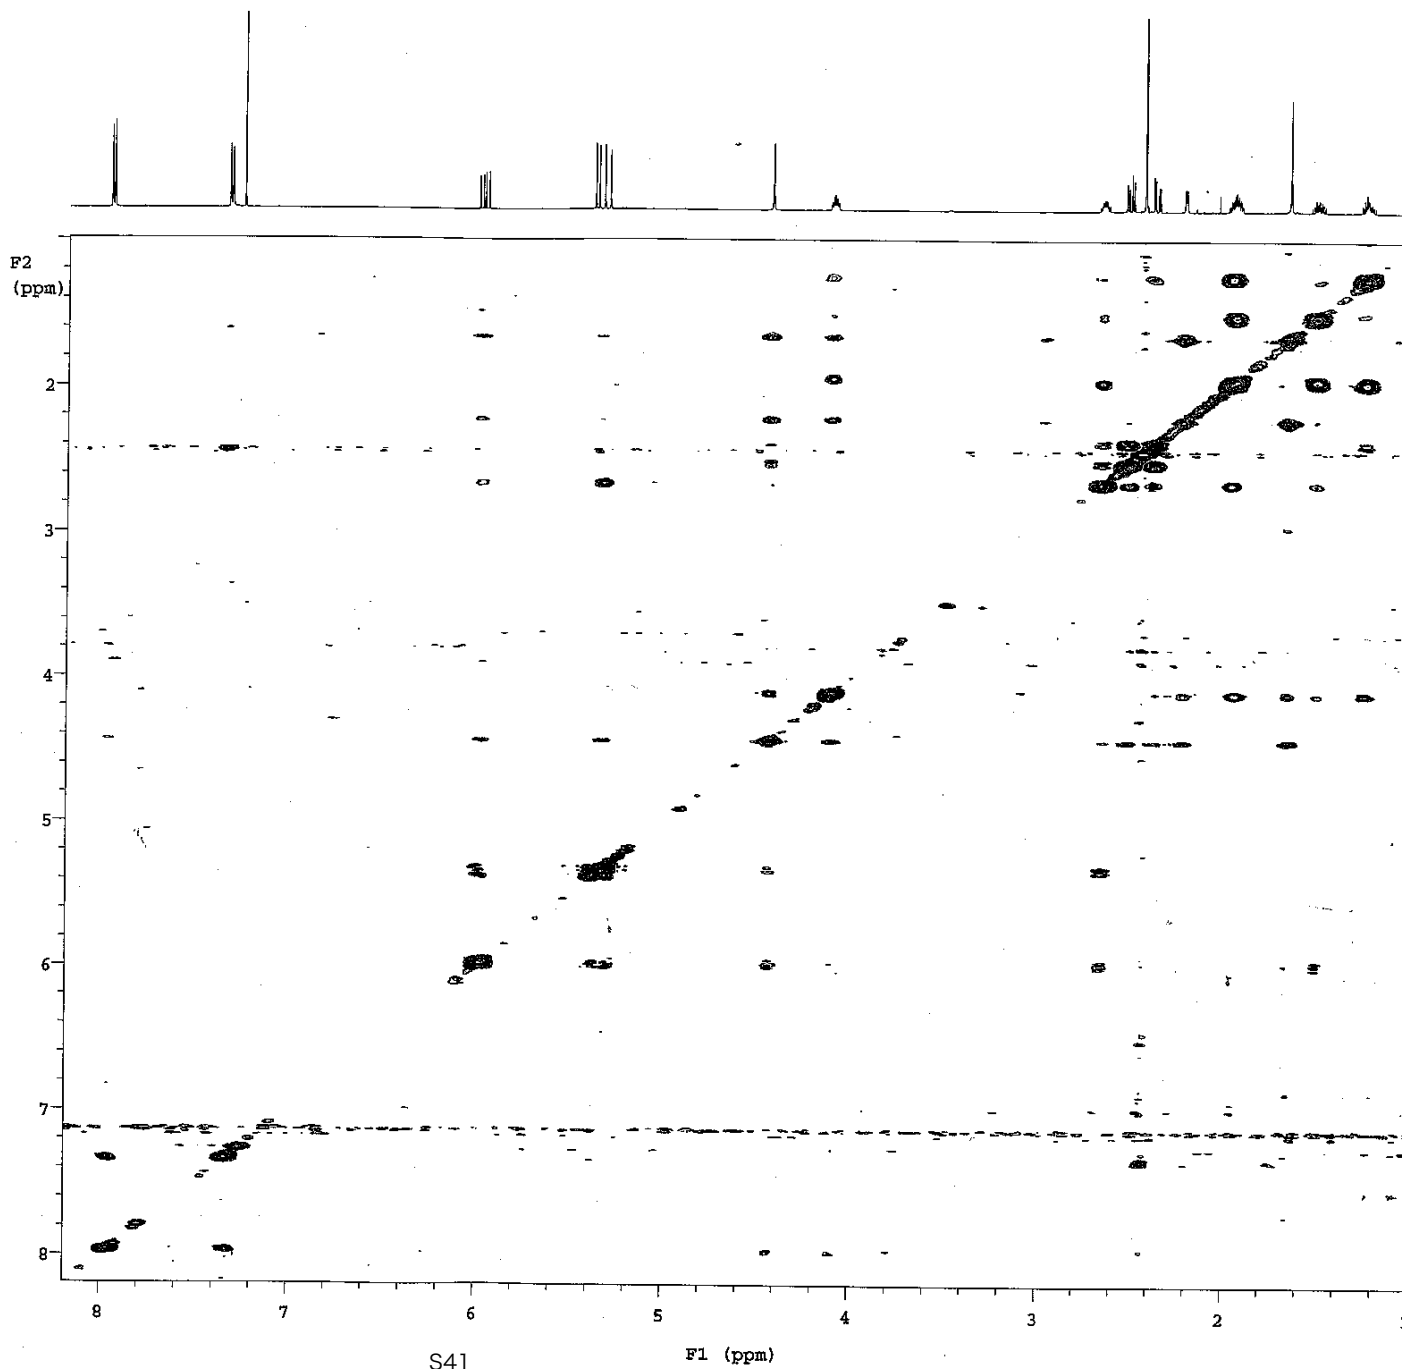

Pulse Sequence: s2pul

Solvent: CDCl3  
Ambient temperature  
Mercury-300 "m300"

PULSE SEQUENCE

Relax. delay 0.500 sec  
Pulse 31.3 degrees  
Acq. time 3.555 sec  
Width 4500.5 Hz  
64 repetitions  
OBSERVE H1, 300.1943863 MHz  
DATA PROCESSING  
PT size 32768  
Total time 4 minutes

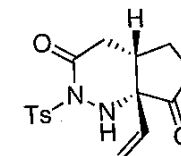

26

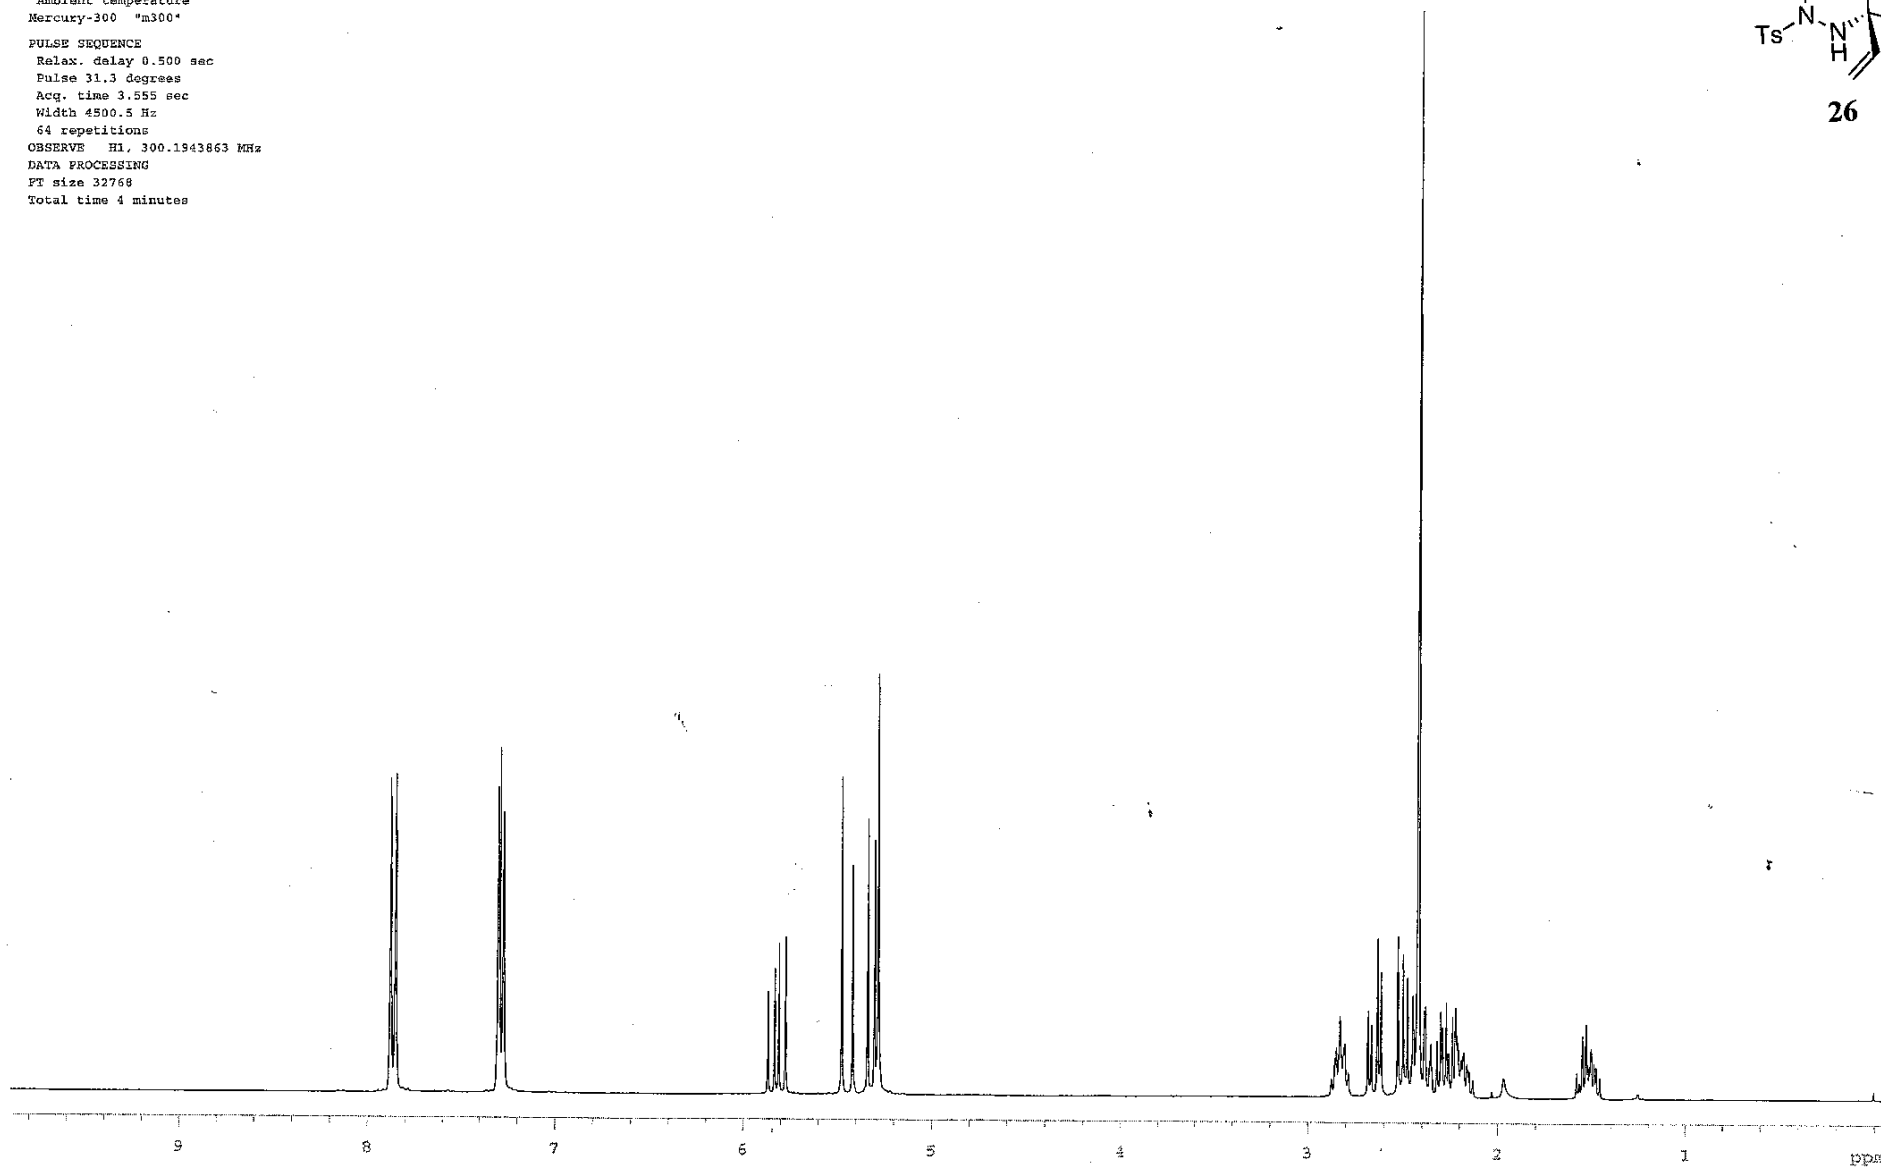

13C OBSERVE

Pulse Sequence: s2pul

Solvent: CDCl3  
Ambient temperature  
Mercury-300 "m300"

PULSE SEQUENCE

Relax. delay 0.294 sec  
Pulse 40.0 degrees  
Acq. time 1.705 sec  
Width 18663.2 Hz  
1048 repetitions  
OBSERVE C13, 75.4839489 MHz  
DECOUPLE H1, 300.1958432 MHz  
Power 38 dB  
continuously on  
WALTZ-16 modulated  
DATA PROCESSING  
Line broadening 1.0 Hz  
FT size 65536  
Total time 34 minutes

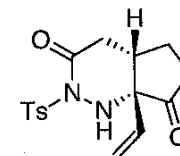

26

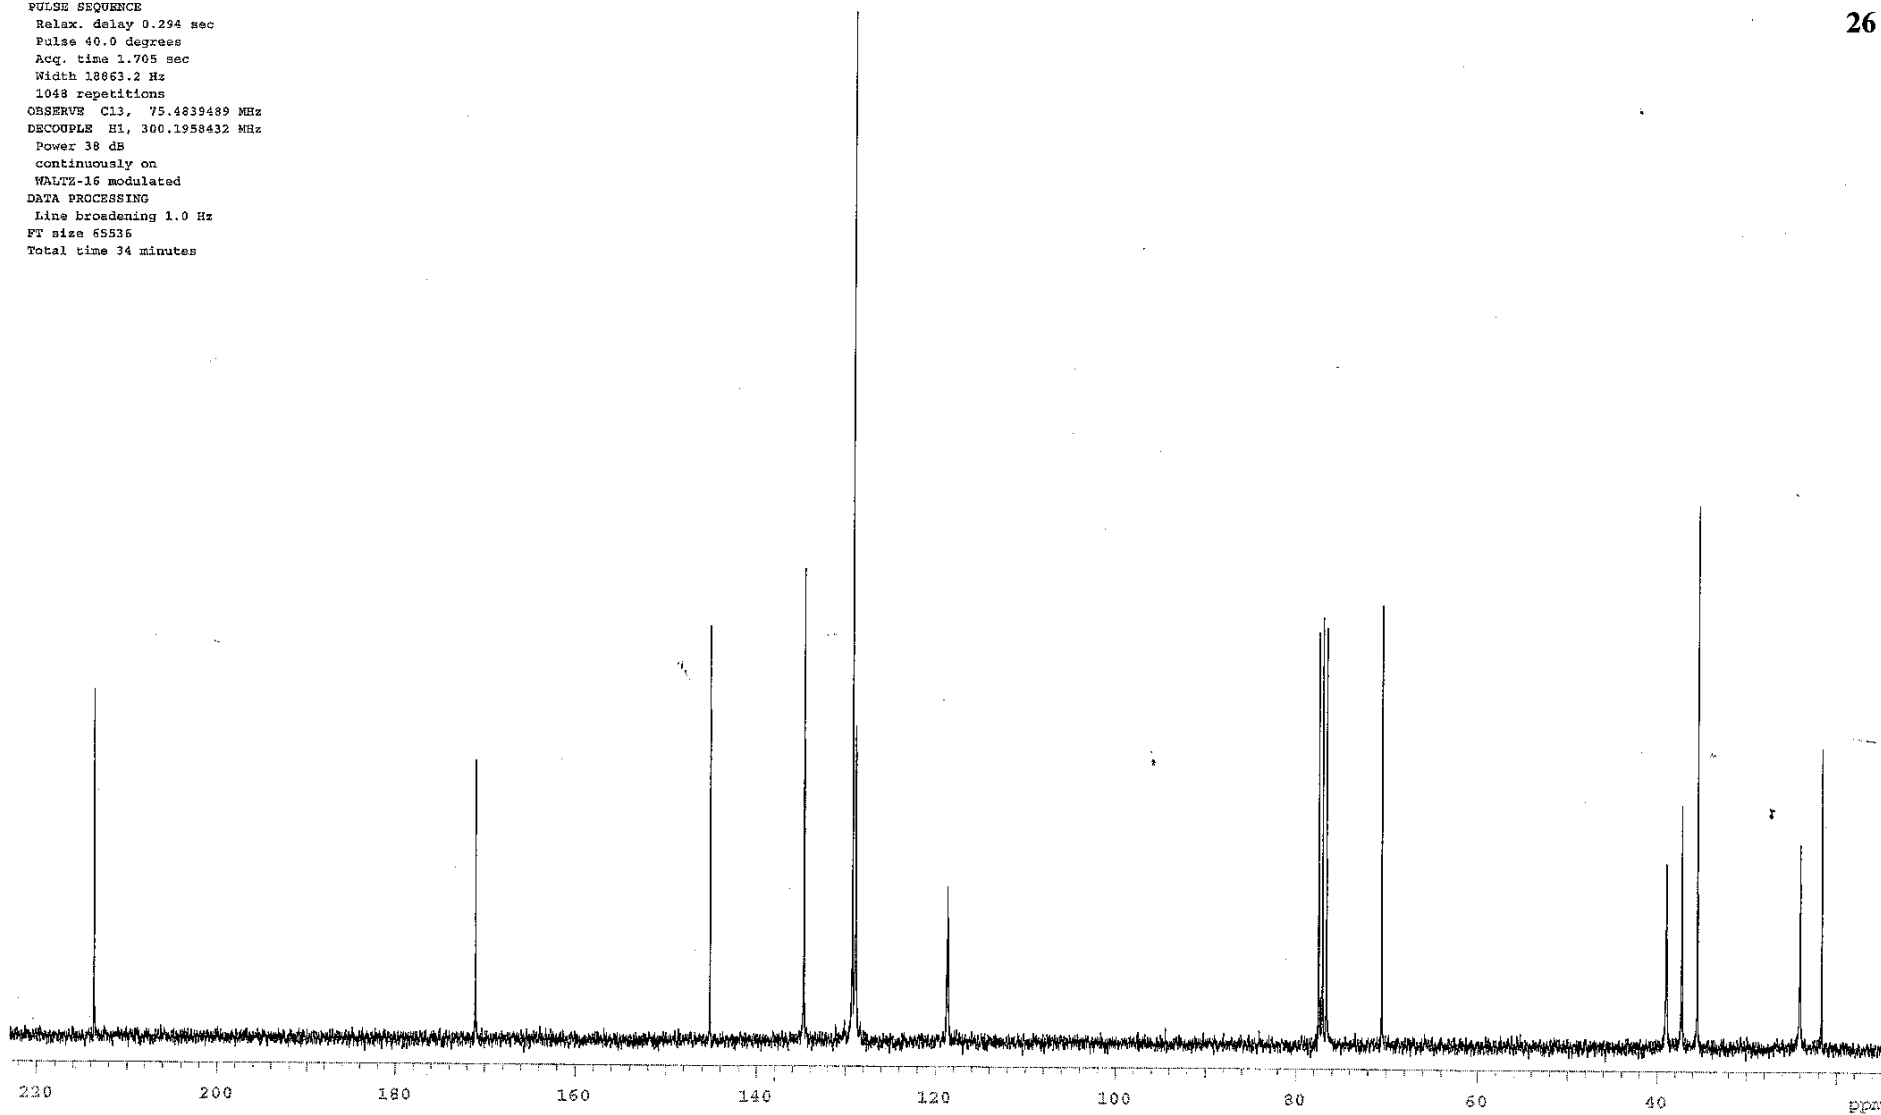

KPa-362-1H-enone

exp2 Proton

| SAMPLE      |            | SPECIAL    |          |
|-------------|------------|------------|----------|
| date        | Oct 3 2008 | temp       | not used |
| solvent     | cdc13      | gain       | not used |
| file        | exp        | spin       | 16       |
| ACQUISITION |            | hst        | 0.008    |
| sv          | 6410.3     | pw90       | 12.500   |
| at          | 3.500      | alfa       | 10.000   |
| np          | 44972      | FLAGS      |          |
| fb          | 4000       | il         | n        |
| bs          | 4          | in         | n        |
| dl          | 1.500      | dp         | y        |
| nt          | 12000      | hs         | na       |
| ct          | 28         | PROCESSING |          |
| TRANSMITTER |            | fn         | not used |
| tn          | H1         | DISPLAY    |          |
| sfreq       | 399.814    | sp         | -40.1    |
| tof         | 399.5      | wp         | 3998.0   |
| tpwr        | 59         | rfl        | 804.0    |
| pw          | 6.250      | rfp        | 0        |
| DECOUPLER   |            | rp         | 75.8     |
| dn          | C13        | lp         | 3.5      |
| dof         | 0          | PLOT       |          |
| dm          | mn         | wc         | 370      |
| dmm         | c          | sc         | 0        |
| dpwr        | 37         | vs         | 220      |
| daf         | 29412      | th         | 12       |
|             | ai         | cdc        | ph       |

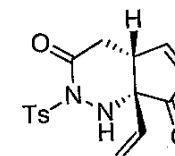

28

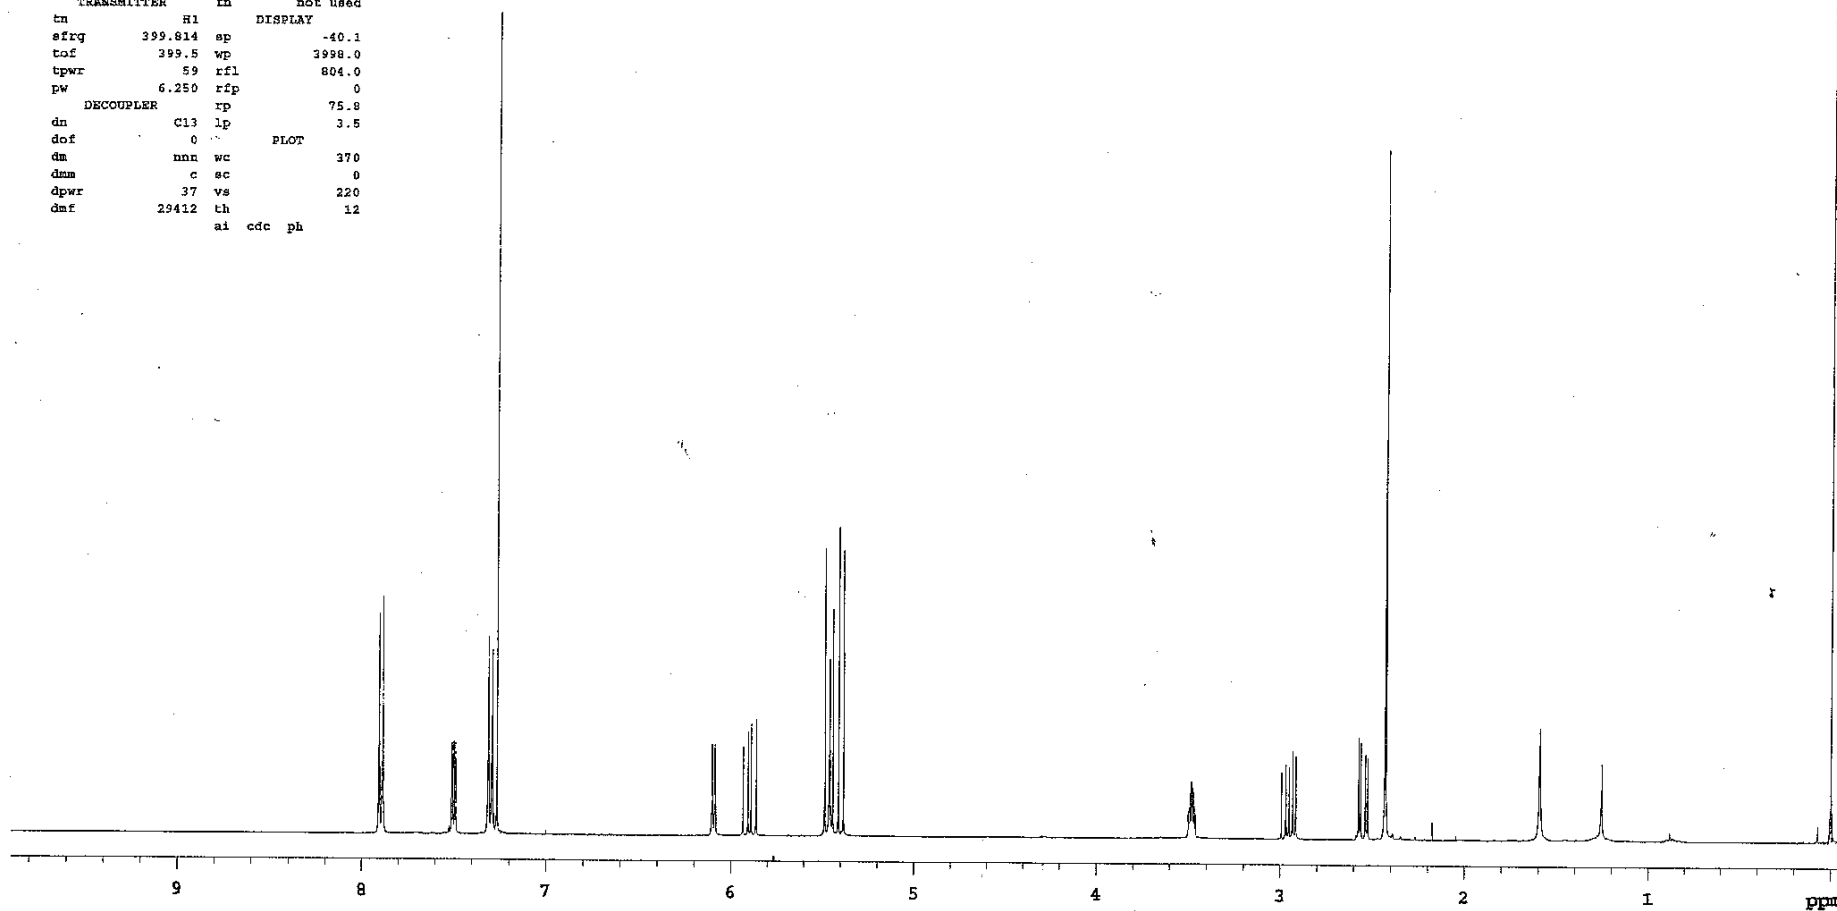

KPa-363-13C-enone

expl Carbon

| SAMPLE      |            | SPECIAL    |          |
|-------------|------------|------------|----------|
| date        | Oct 3 2008 | temp       | not used |
| solvent     | cdcl3      | gain       | not used |
| file        | exp        | spin       | 16       |
| ACQUISITION |            | hst        | 0.008    |
| sw          | 24509.8    | pw90       | 13.200   |
| at          | 1.300      | alfa       | 10.000   |
| np          | 63750      | FLAGE      |          |
| fb          | 17000      | ii         | n        |
| bs          | 16         | in         | n        |
| di          | 0.700      | dp         | y        |
| nt          | 300000     | hs         | nn       |
| ct          | 3056       | PROCESSING |          |
| TRANSMITTER |            | lb         | 1.00     |
| tn          | CI3        | fn         | not used |
| sfrq        | 100.543    | DISPLAY    |          |
| tof         | 1042.7     | sp         | -392.5   |
| tpwr        | 56         | wp         | 22514.9  |
| pw          | 6.600      | rfl        | 9465.7   |
| DECOUPLER   |            | rtp        | 7744.0   |
| dn          | H1         | rp         | -131.1   |
| dof         | 0          | lp         | 28.2     |
| dm          | yyy        | PLOT       |          |
| dmm         | w          | wc         | 170      |
| dpwr        | 41         | sc         | 0        |
| dmf         | 10200      | vs         | 6881     |
|             |            | th         | 7        |
|             | al         | cdc        | ph       |

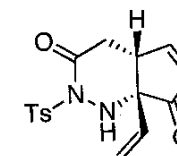

28

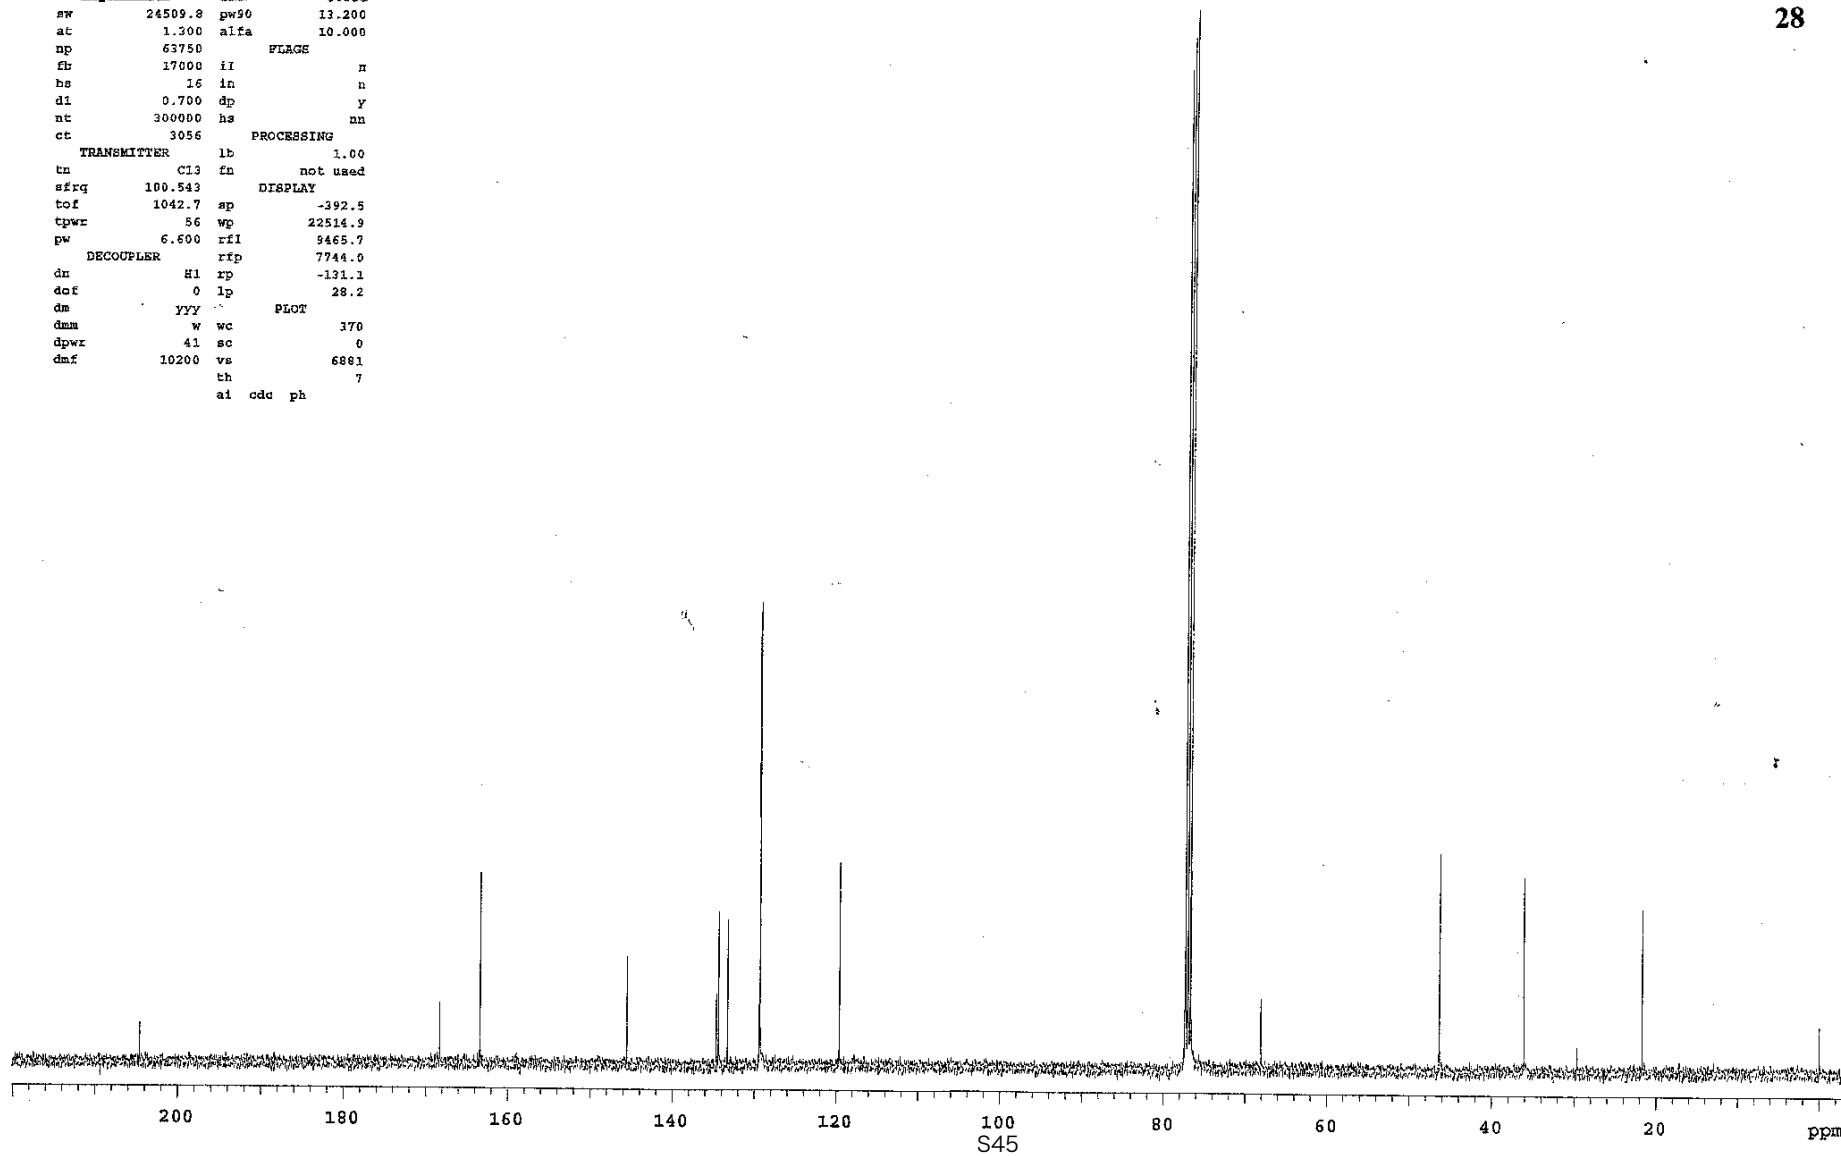

STANDARD 1H OBSERVE

expt stdlh

```
SAMPLE          DEC. & VT
date Sep 21 2008 dfrq 299.974
solvent methanol dn H1
file exp dpwr 30
ACQUISITION dof 0
sfrq 299.974 dm nnn
tn H1 dnm c
at 4.000 dmf 200
np 36036 PROCESSING
sw 4504.5 wtfile
fb 2600 proc ft
bs 4 fn not used
tpwr 63
pw 4.0 wexr
dl 1.000 wexp wft
tof 0 wbs wft
nt 100000 wnt
ct 72
alock n
gain not used
FLAGS
il n
in n
dp y
DISPLAY
sp 419.9
wp 2249.8
vs 203
sc 0
wc 370
hzmm 6.08
ls 1200.58
rfl 2771.5
rfp 1433.9
th 20
ins 100.000
nm cdc ph
```

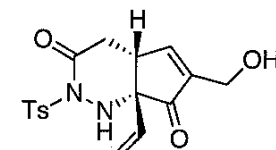

29  
in CD<sub>3</sub>OD

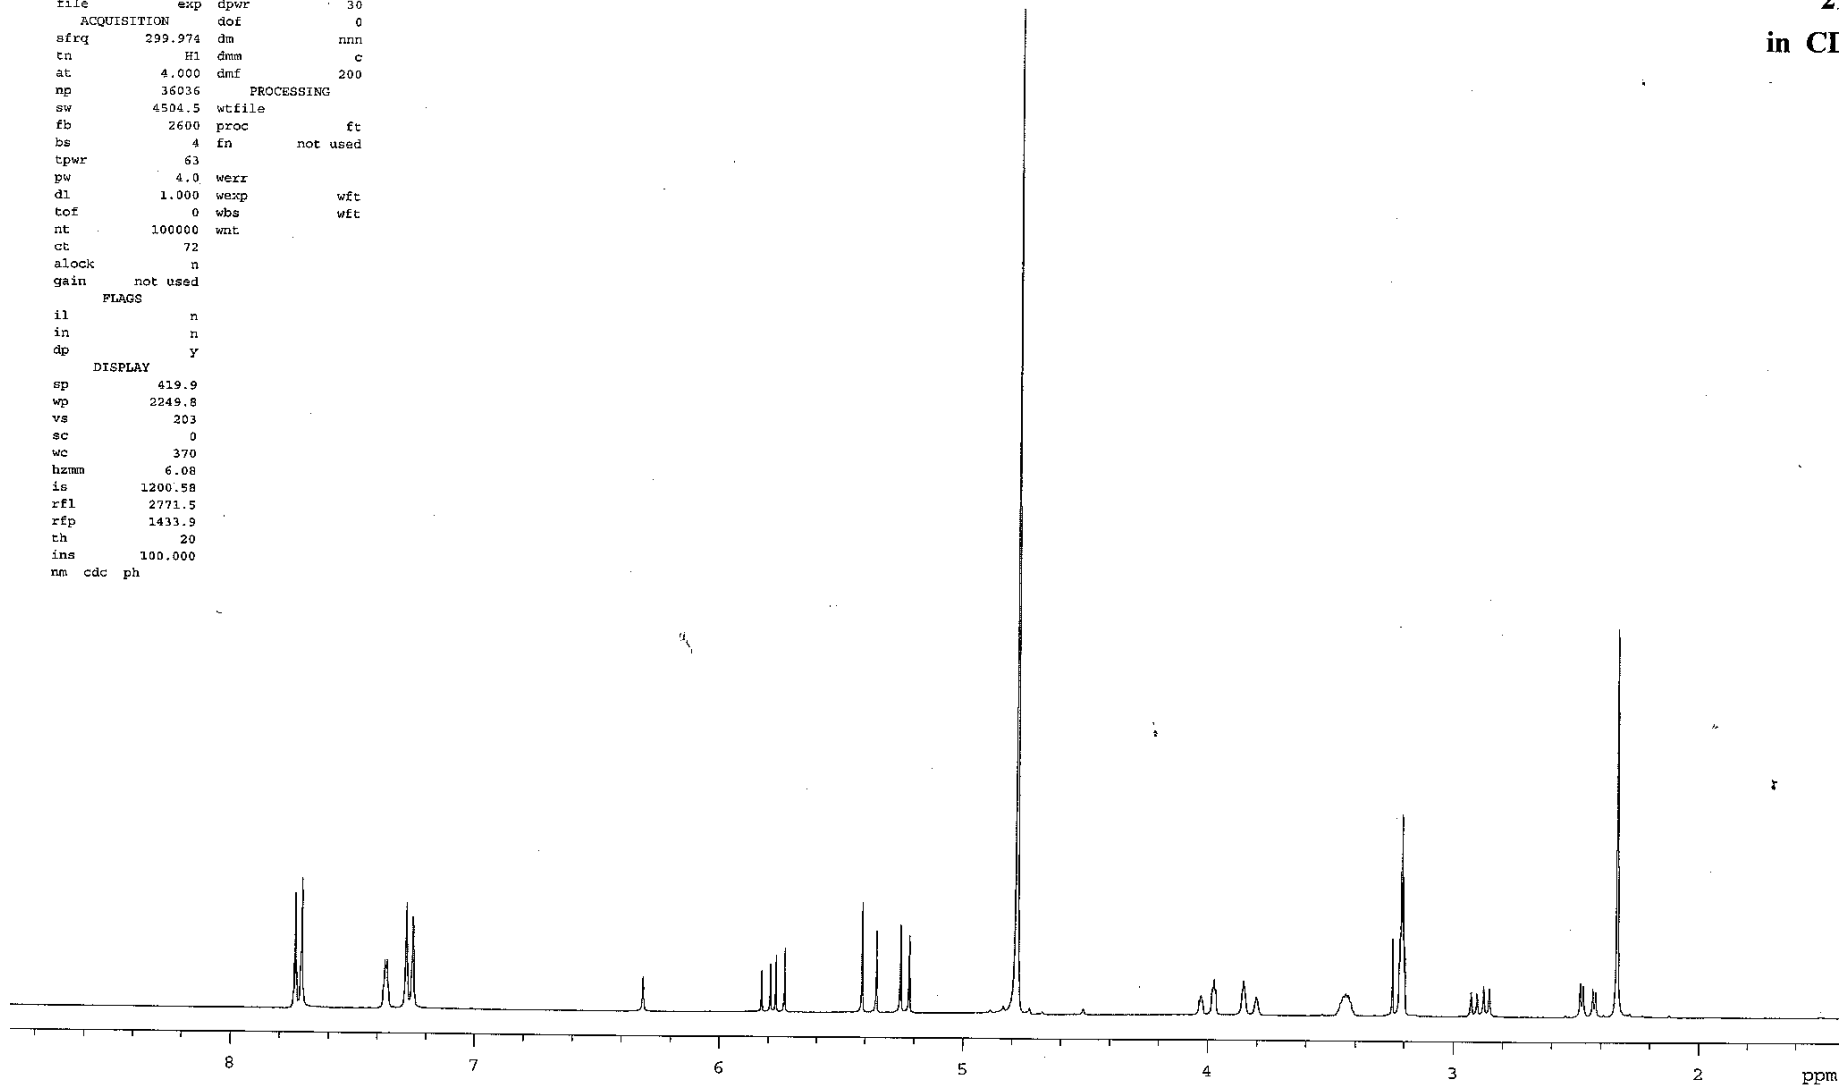

13C OBSERVE

Pulse Sequence: s2pul

Solvent: methanol

Ambient temperature

File: KPa-354-13C-092208\_02\_43

INOVA-600 "NMR"

Pulse 54.2 degrees

Acq. time 1.815 sec

Width 18761.7 Hz

11237 repetitions

OBSERVE C13, 75.4280880 MHz

DECOUPLE H1, 299.9737314 MHz

Power 39 dB

continuously on

WALTZ-16 modulated

DATA PROCESSING

Line broadening 2.0 Hz

FT size 131072

Total time 50 hr, 39 min, 47 sec

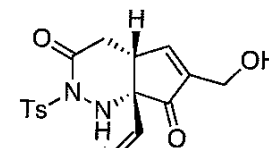

29

in CD<sub>3</sub>OD

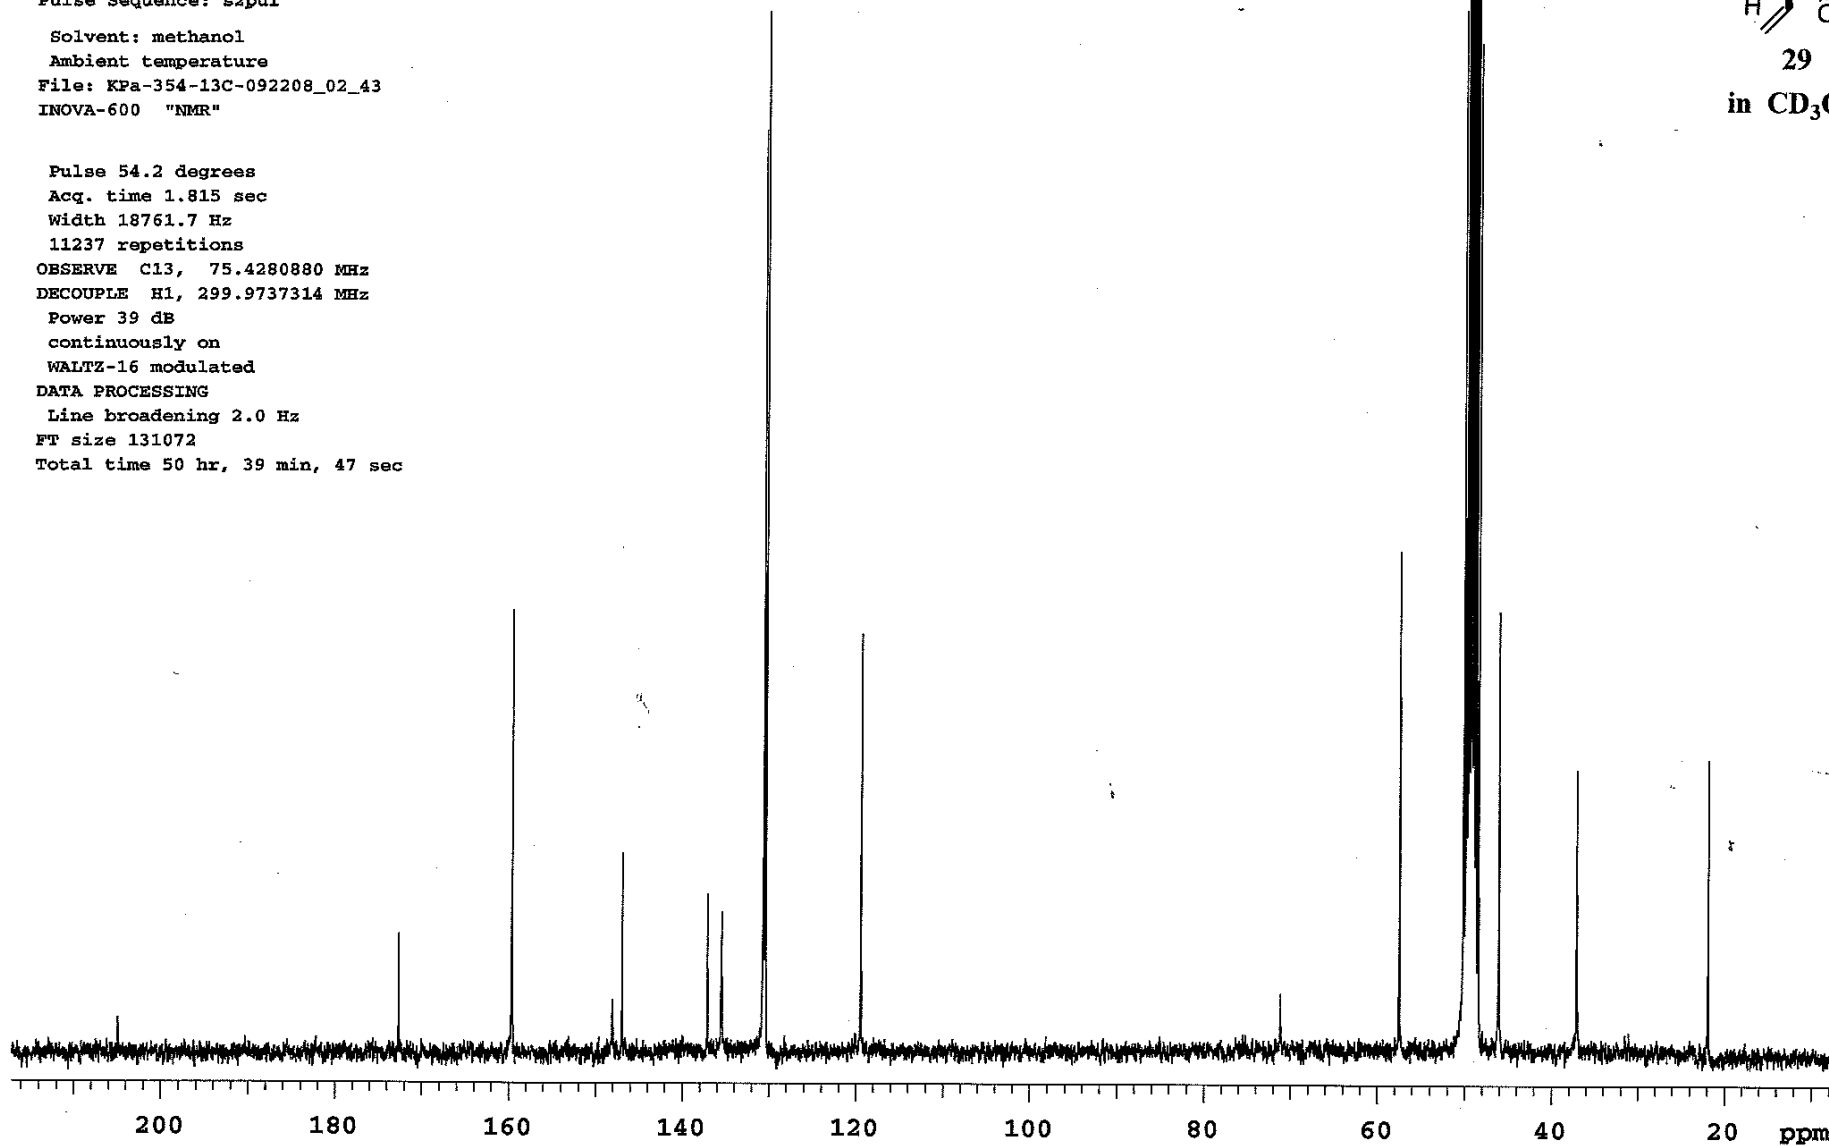

KPa-366-1H-pure

expt Proton

| SAMPLE      |             | SPECIAL    |          |
|-------------|-------------|------------|----------|
| date        | Oct 11 2009 | temp       | not used |
| solvent     | cdcl3       | gain       | not used |
| file        | exp         | spin       | 16       |
| ACQUISITION |             | FLAGS      |          |
| sw          | 6410.1      | pw90       | 12.500   |
| at          | 3.500       | alfa       | 10.000   |
| np          | 44872       |            |          |
| fb          | 4000        | il         | n        |
| bs          | 4           | in         | n        |
| dl          | 1.500       | dp         | y        |
| nt          | 12000       | hs         | an       |
| ct          | 72          |            |          |
| TRANSMITTER |             | PROCESSING |          |
| tn          | H1          | fn         | not used |
| sfry        | 399.814     | sp         | -40.1    |
| tof         | 399.5       | wp         | 3998.0   |
| tpwr        | 59          | rfl        | 803.6    |
| pw          | 6.250       | rfp        | 0        |
| DECOUPLER   |             | PLOT       |          |
| dn          | C13         | lp         | 0.7      |
| dof         | 0           |            |          |
| dm          | nnn         | wc         | 270      |
| dmm         | c           | ac         | 0        |
| dpwr        | 37          | vs         | 904      |
| dmf         | 29412       | tn         | 12       |
|             | ai          | cdc        | ph       |

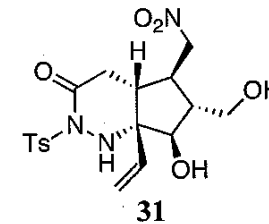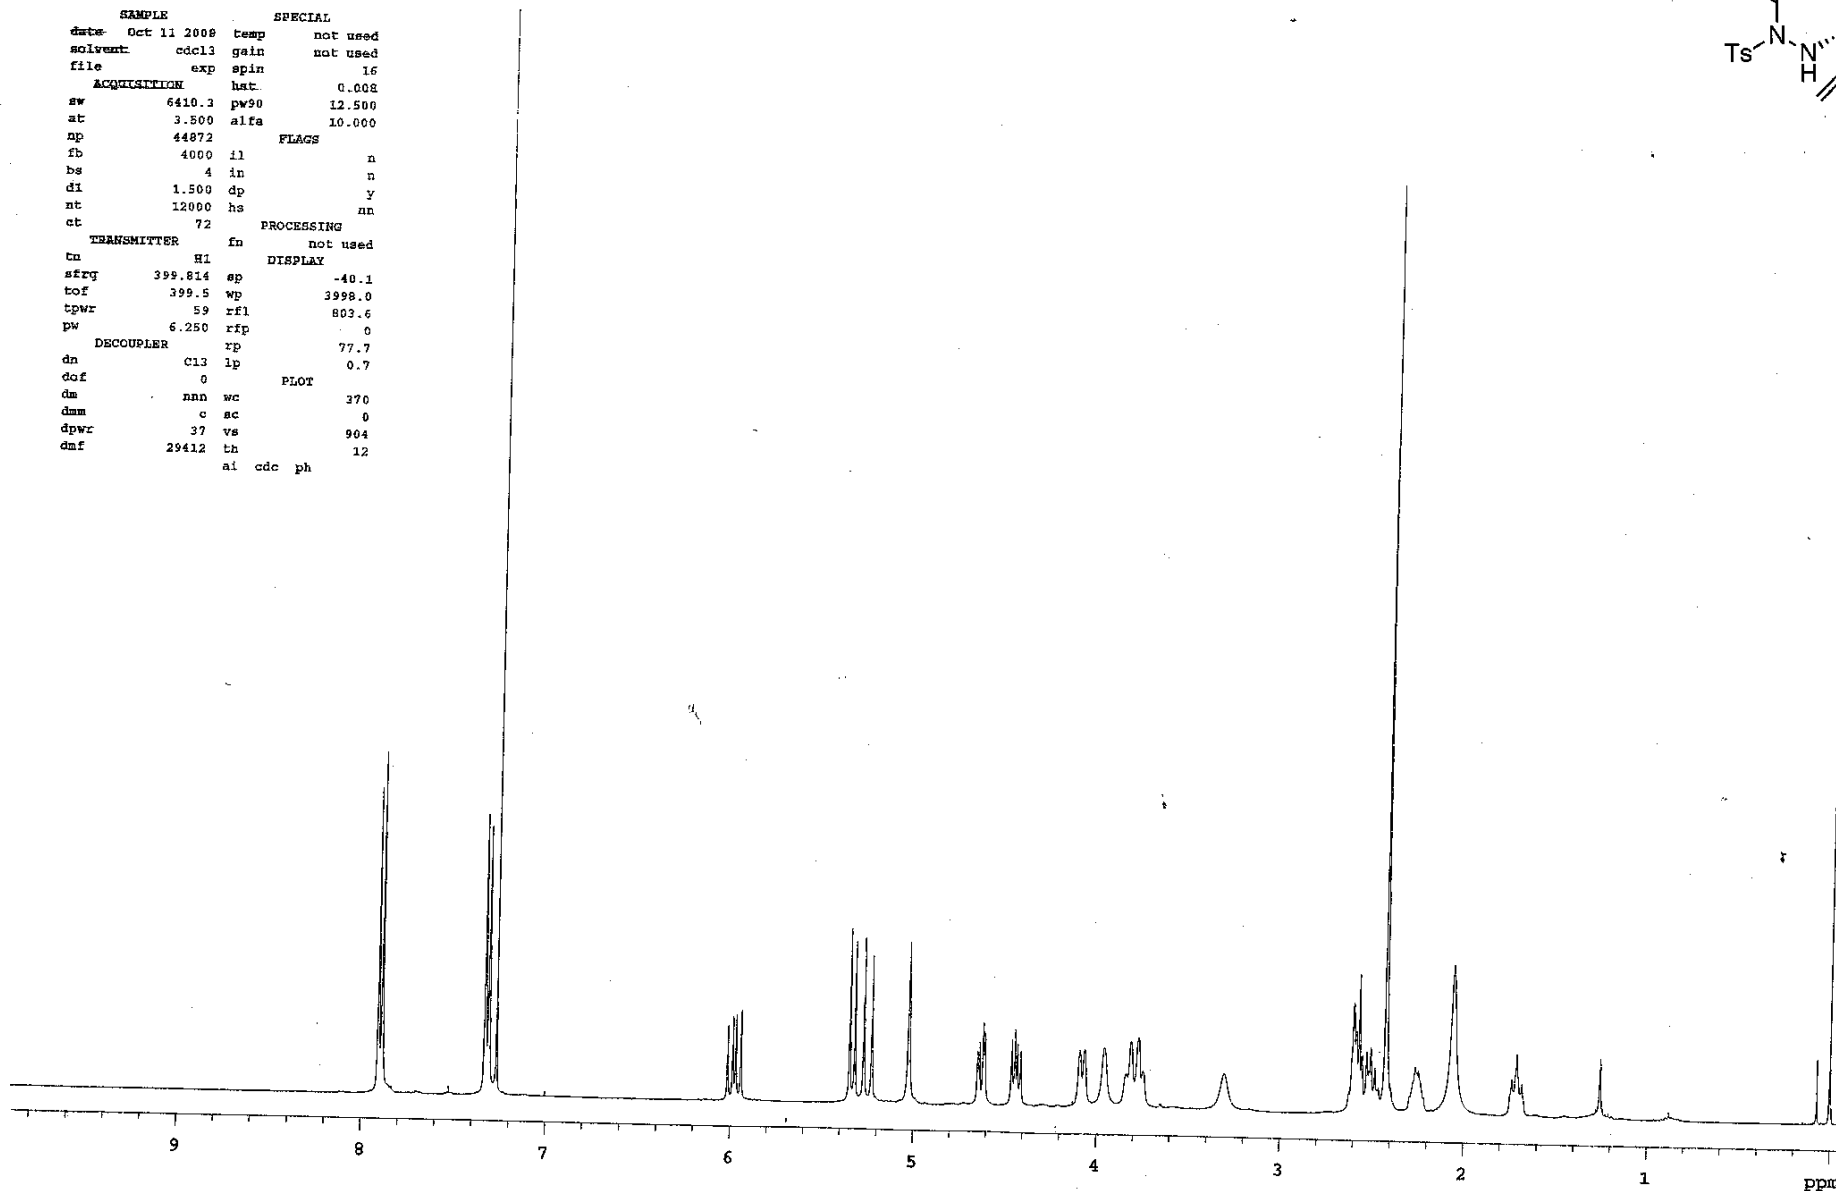



KEa-166-11C-pure

exp4 Carbon

| SAMPLE      |             | SPECIAL    |          |
|-------------|-------------|------------|----------|
| date        | Oct 11 2008 | temp       | not used |
| solvent     | cdcl3       | gain       | not used |
| file        | exp         | spin       | 16       |
| ACQUISITION |             | bst        | 0.008    |
| sw          | 24509.8     | pw90       | 13.200   |
| at          | 1.300       | alfa       | 10.000   |
| np          | 63750       | PLACS      |          |
| fb          | 17000       | ii         | n        |
| bs          | 16          | in         | n        |
| d1          | 0.700       | dp         | Y        |
| nt          | 300000      | hs         | un       |
| ct          | 608         | PROCESSING |          |
| TRANSMITTER |             | lb         | 1.00     |
| tu          | C13         | fn         | not used |
| sfrq        | 100.643     | DISPLAY    |          |
| tof         | 1042.7      | sp         | -396.2   |
| tpwr        | 56          | wp         | 19500.6  |
| pw          | 6.600       | rfl        | 9465.7   |
| DECOUPLER   |             | r1p        | 7744.0   |
| dn          | H1          | rp         | -123.7   |
| dof         | 0           | lp         | 30.5     |
| dm          | YYY         | PLOT       |          |
| dmm         | w           | wc         | 370      |
| dpwr        | 41          | sc         | 0        |
| dmf         | 10200       | vs         | 7718     |
|             |             | th         | 21       |
|             |             | al         | cdc ph   |

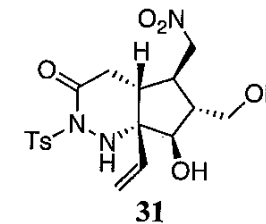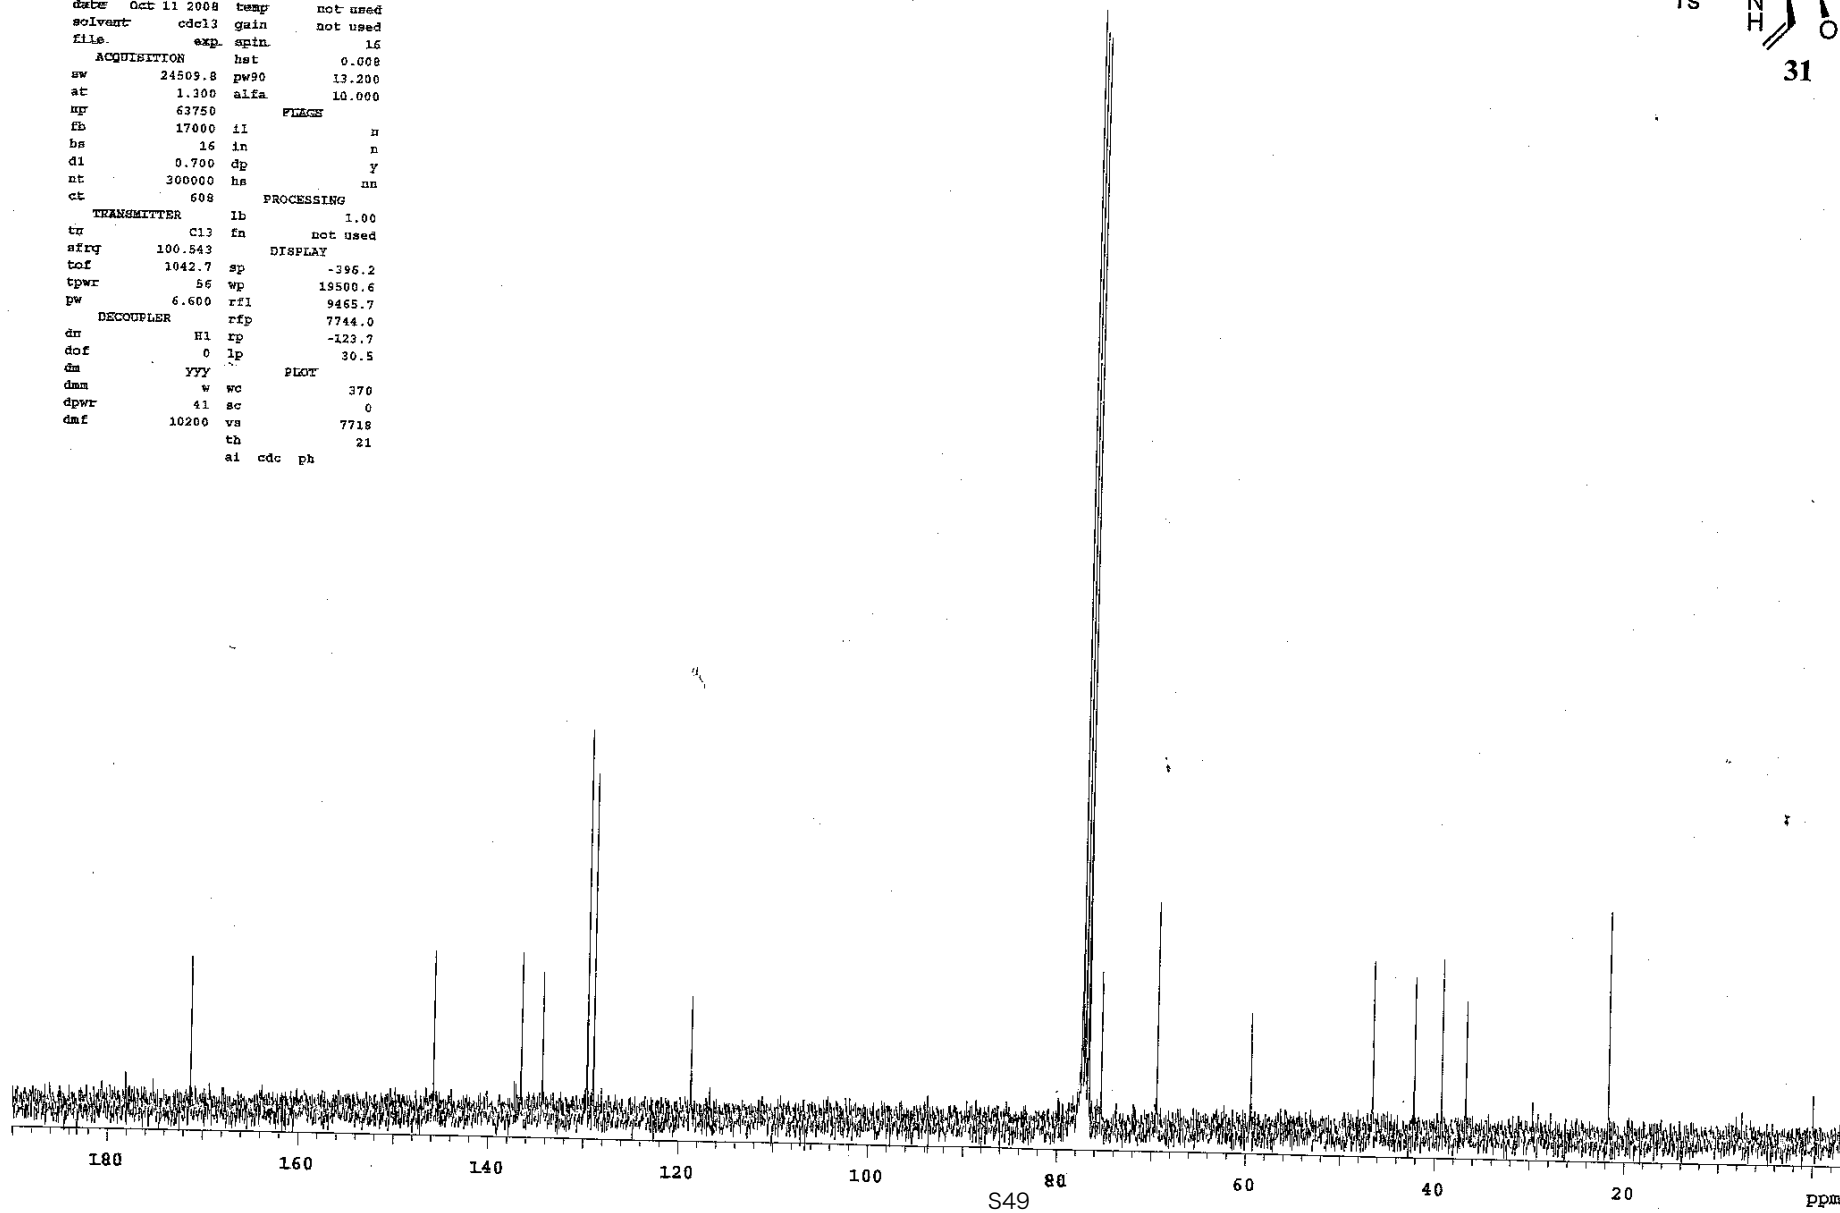

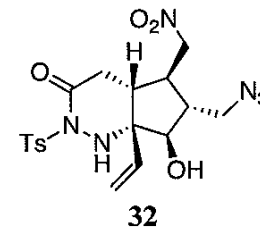

Pulse Sequence: s2pul

Solvent: CDCl3

Ambient temperature

File: KPa-403-pure-1H-112608\_23\_51

INOVA-600 "NMR"

Relax. delay 0.500 sec

Pulse 31.3 degrees

Acq. time 3.555 sec

Width 4500.5 Hz

268 repetitions

OBSERVE H1, 300.1943971 MHz

DATA PROCESSING

FT size 32768

Total time 11 hr, 17 min, 20 sec

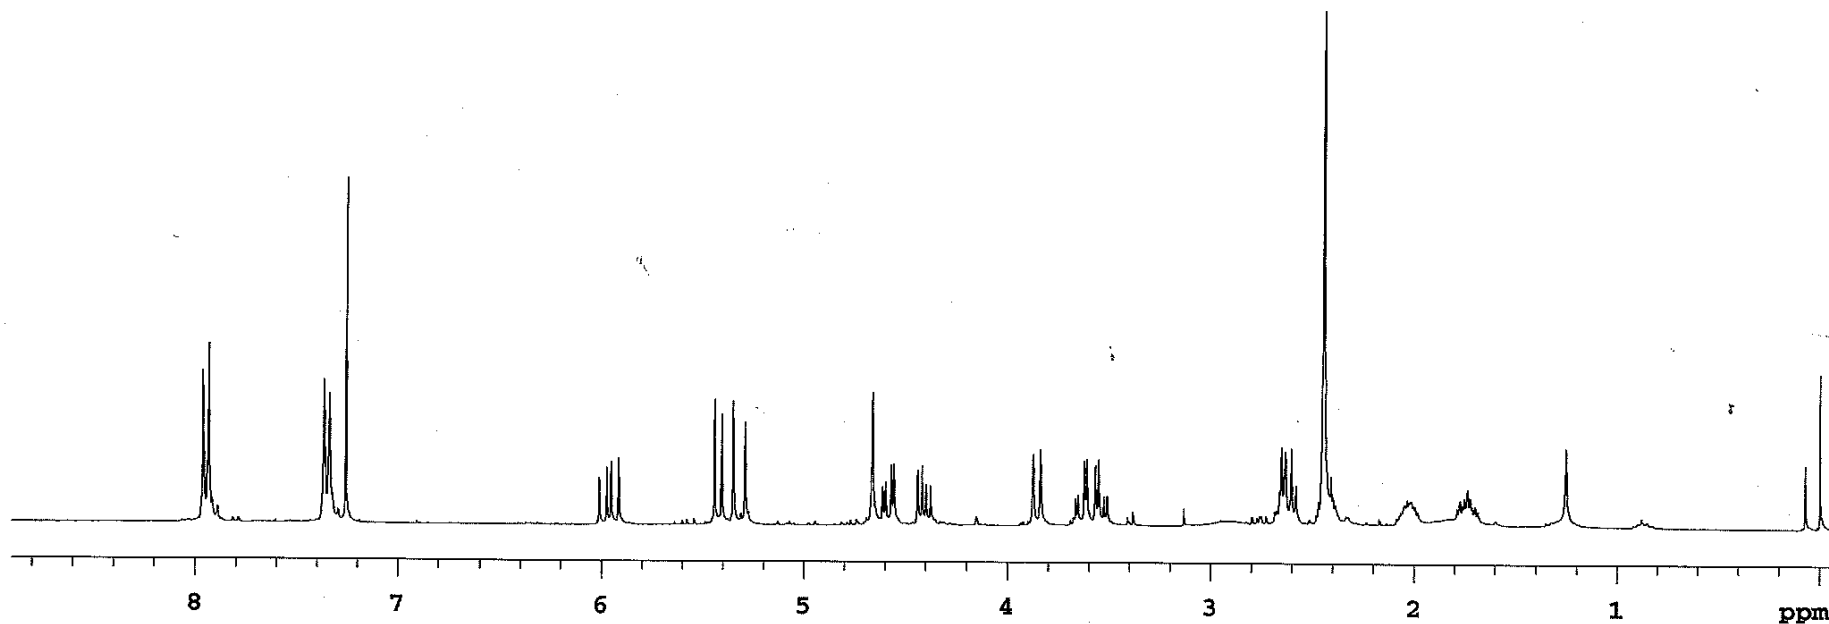

KPa-403-L3C

exp4 Carbon

| SAMPLE      |             | SPECIAL    |          |
|-------------|-------------|------------|----------|
| date        | Nov 22 2008 | temp       | not used |
| solvent     | cdc13       | gain       | not used |
| file        | exp         | spin       | 16       |
| ACQUISITION |             | hat        | 0.008    |
| sw          | 24509.8     | pw90       | 13.200   |
| at          | 1.300       | alfa       | 10.000   |
| ap          | 63750       | FLAGS      |          |
| fb          | 17000       | ii         | n        |
| bs          | 16          | in         | n        |
| dl          | 0.700       | dp         | Y        |
| nt          | 30000       | hs         | nn       |
| ct          | 1104        | PROCESSING |          |
| TRANSMITTER |             | lb         | 1.00     |
| tn          | C13         | fb         | not used |
| sfrq        | 100.543     | DISPLAY    |          |
| tof         | 1042.7      | sp         | -50.7    |
| tpwr        | 56          | wp         | 20106.4  |
| pw          | 6.600       | rfl        | 9467.2   |
| DECOUPLER   |             | rfp        | 7744.0   |
| dn          | H1          | rp         | -94.9    |
| dof         | 0           | lp         | -20.9    |
| dm          | YYY         | PLOT       |          |
| dmm         | w           | wc         | 370      |
| dpwr        | 41          | sc         | 0        |
| dmf         | 10200       | vs         | 6084     |
|             |             | th         | 19       |
|             |             | al         | cdc ph   |

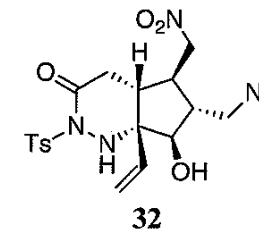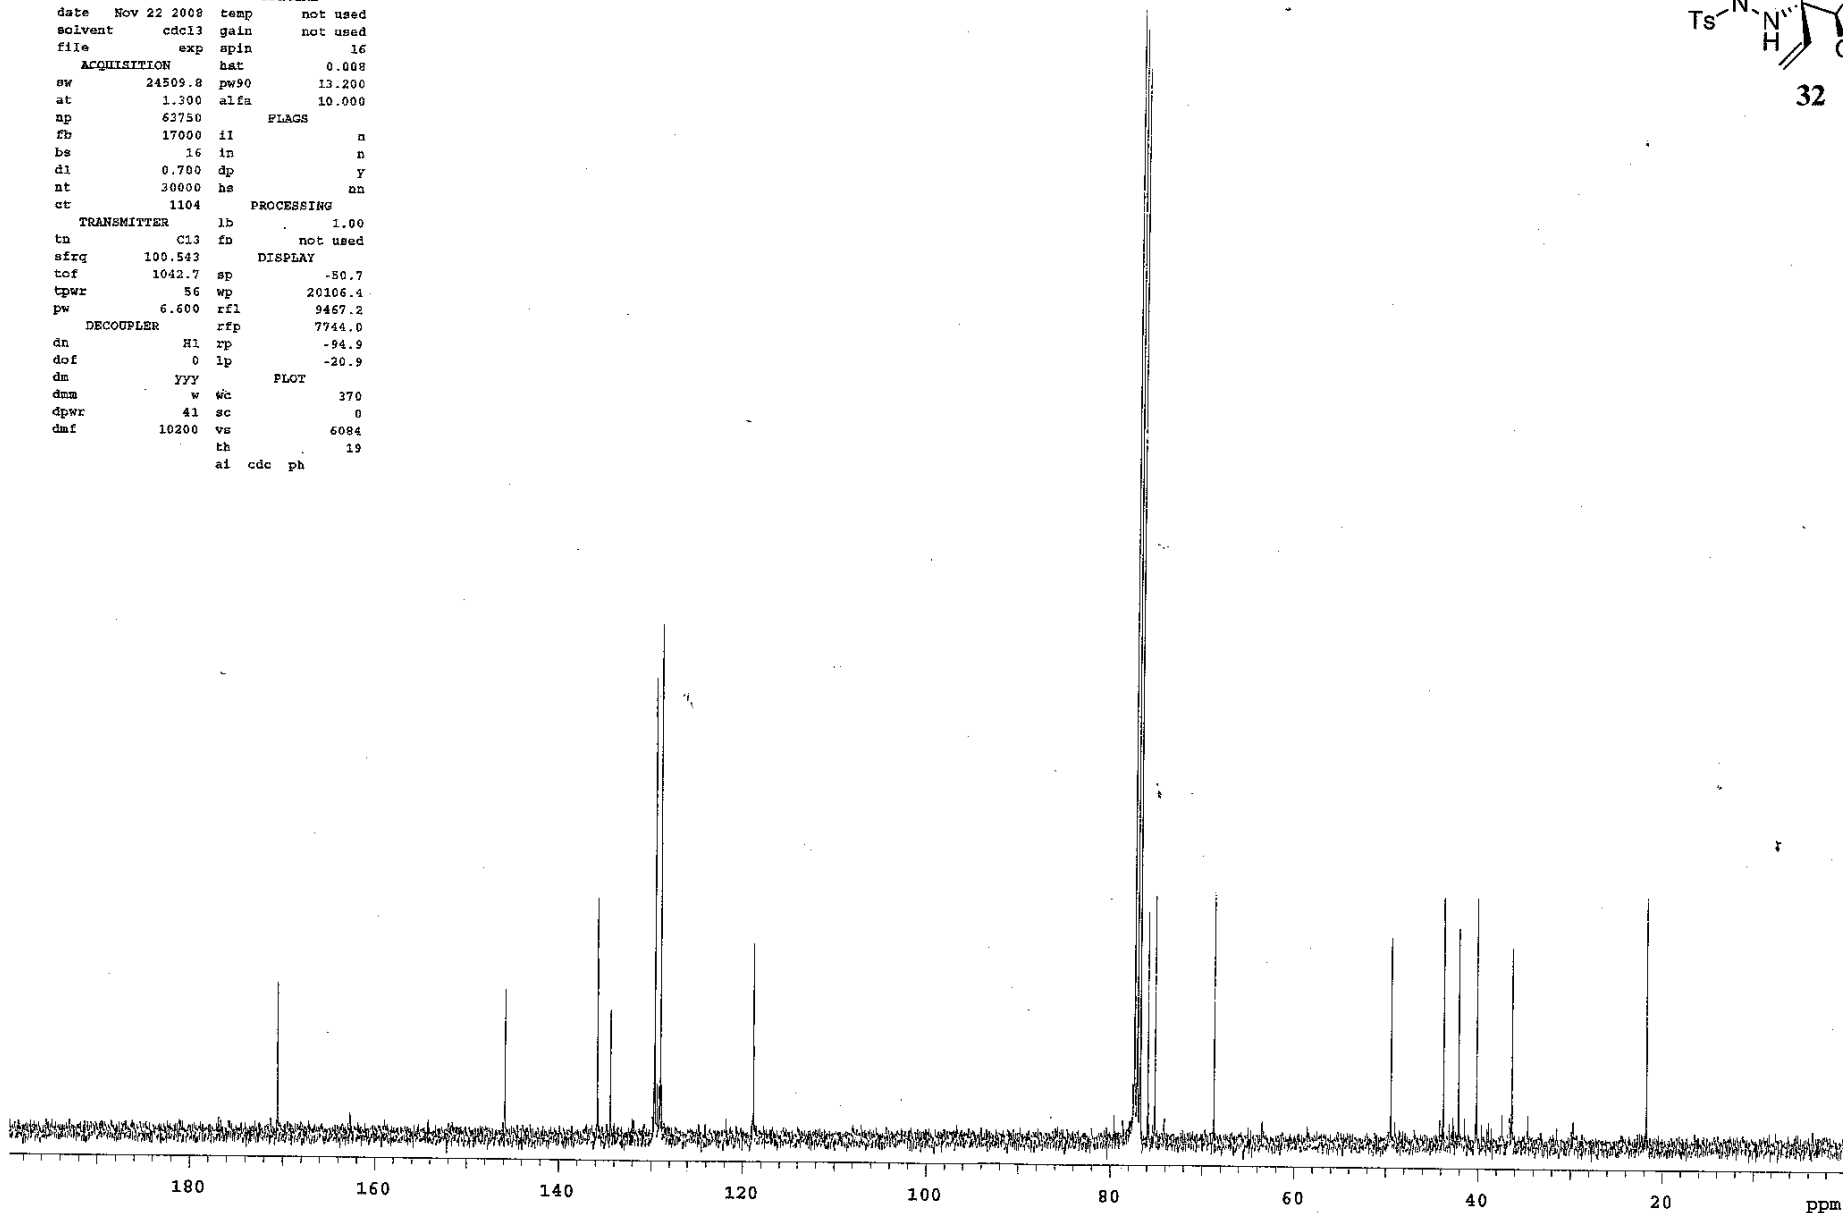

S51

KPa-390(up-middle)-mix-1H

expl. Proton

| SAMPLE      |             | SPECIAL    |          |
|-------------|-------------|------------|----------|
| date        | Nov 12 2008 | temp       | not used |
| solvent     | cdcl3       | gain       | not used |
| file        |             | exp        | spin 16  |
| ACQUISITION |             | nat        | 0.008    |
| sw          | 6410.3      | pw90       | 12.500   |
| at          | 3.500       | alfa       | 10.000   |
| np          | 44872       | FLAGS      |          |
| fb          | 4000        | il         | r        |
| hs          | 4           | in         | n        |
| dl          | 1.500       | dp         | y        |
| nt          | 12000       | hs         | nn       |
| ct          | 36          | PROCESSING |          |
| TRANSMITTER |             | fn         | not used |
| tu          | H1          | DISPLAY    |          |
| sfreq       | 399.614     | sp         | -40.1    |
| tof         | 399.5       | wp         | 3998.0   |
| tpwr        | 59          | rfl        | 802.8    |
| pw          | 6.250       | rfp        | 0        |
| DECOUPLER   |             | rp         | 69.4     |
| dr          | Cl3         | lp         | 8.7      |
| dof         | 0           | PLOT       |          |
| dm          | nnn         | wc         | 370      |
| dmm         | c           | sc         | 0        |
| dpwr        | 37          | vs         | 2368     |
| dmi         | 29412       | th         | 12       |
|             | al          | cdc        | ph       |

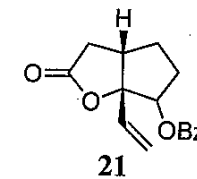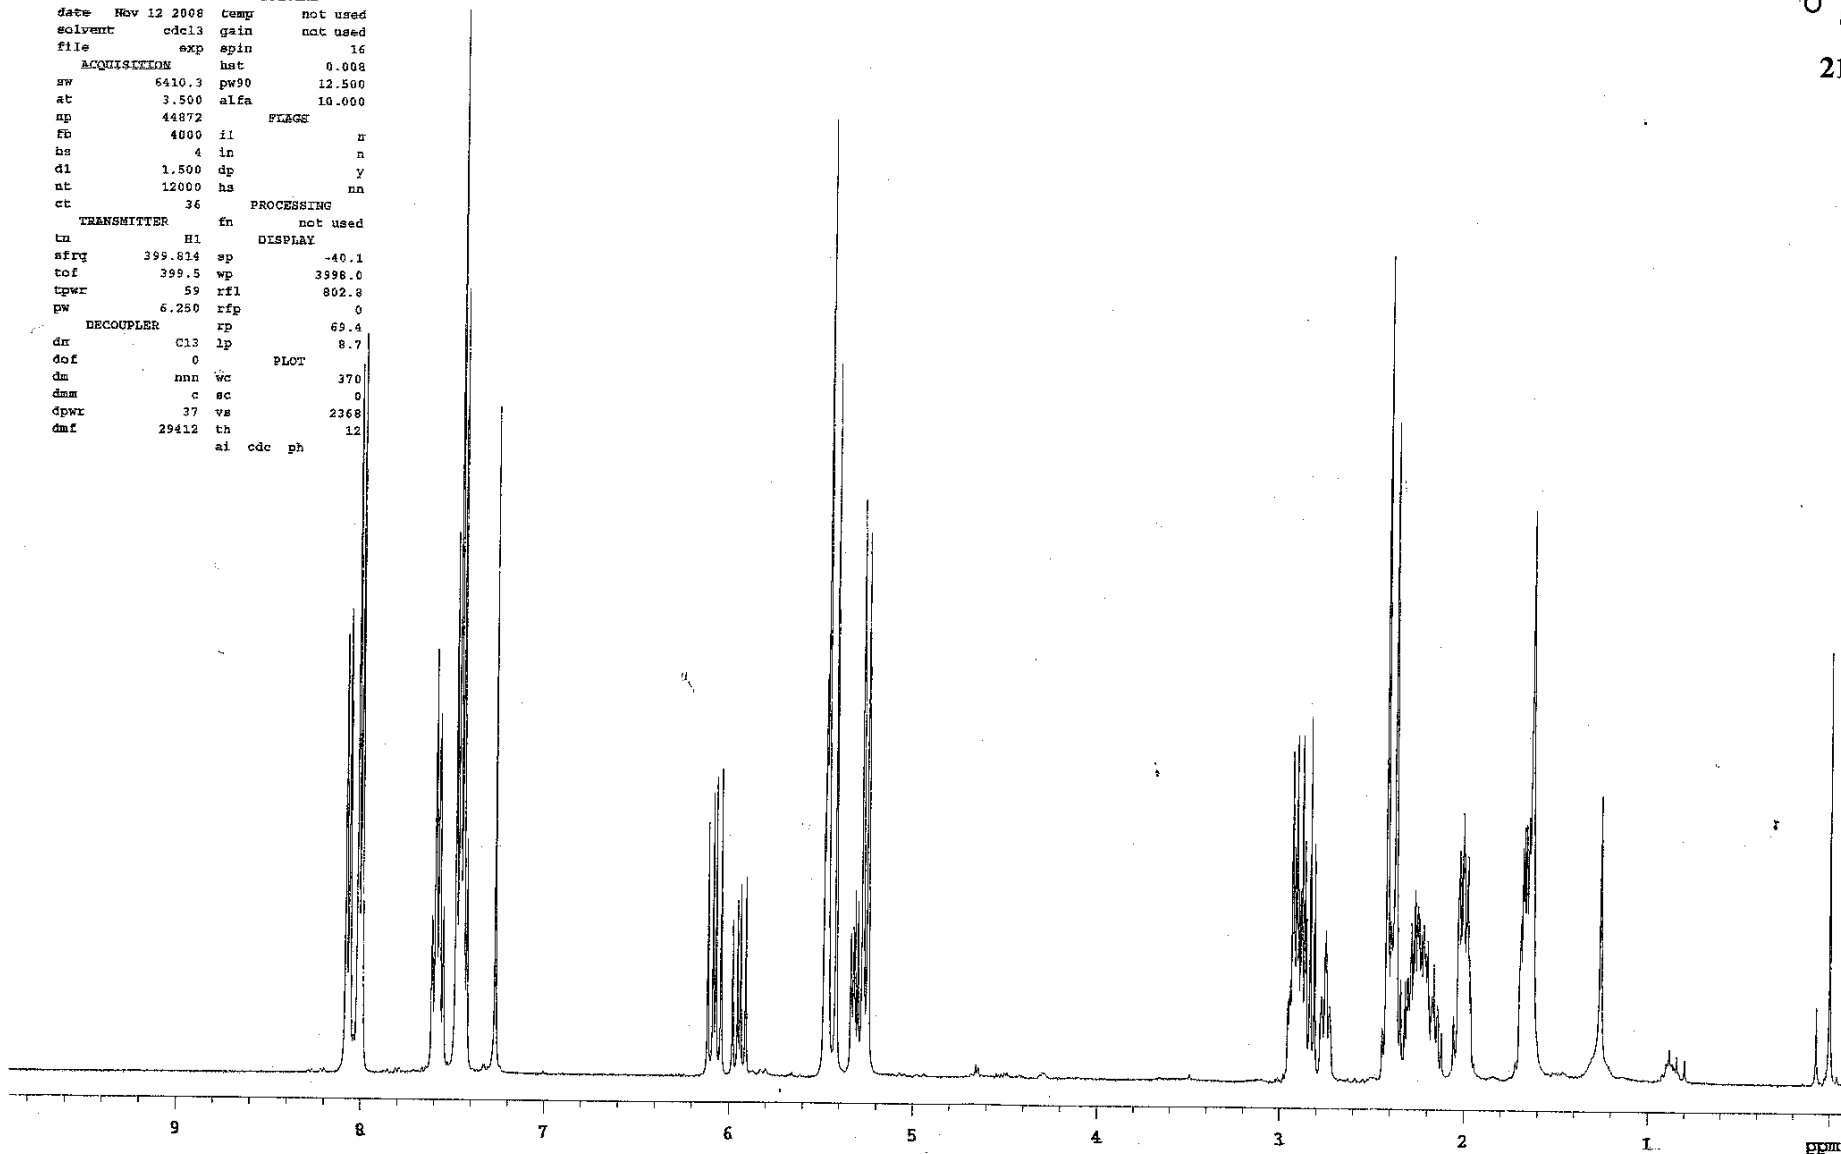

KEA-190(up-middle)-mix-13C

exp3 Carbon

| SAMPLE      |             | SPECIAL    |          |
|-------------|-------------|------------|----------|
| date        | Nov 12 2008 | temp       | not used |
| solvent     | cdc13       | gain       | not used |
| file        | exp         | spin       | 16       |
| ACQUISITION |             | PARAMETERS |          |
| sw          | 24509.8     | ps90       | 13.200   |
| at          | 1.300       | alfa       | 10.000   |
| sp          | 63750       | FLAGS      |          |
| fb          | 17000       | tl         | n        |
| bs          | 16          | in         | n        |
| dl          | 0.700       | dp         | y        |
| nt          | 30000       | hs         | un       |
| ct          | 1056        | PROCESSING |          |
| TRANSMITTER |             | lb         | 1.00     |
| tr          | C13         | fn         | not used |
| sfrq        | 100.543     | DISPLAY    |          |
| tof         | 1042.7      | sp         | -50.7    |
| tpwr        | 56          | wp         | 20106.4  |
| pw          | 6.600       | rfl        | 9467.2   |
| DECOUPLER   |             | rfp        | 7744.0   |
| dn          | H1          | rp         | -123.7   |
| dof         | 0           | lp         | 33.5     |
| dm          | yyy         | PLOT       |          |
| dms         | w           | wc         | 370      |
| dpwr        | 41          | sc         | 0        |
| dms         | 10200       | vs         | 6834     |
|             |             | th         | 9        |
|             |             | ai         | cdc ph   |

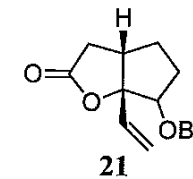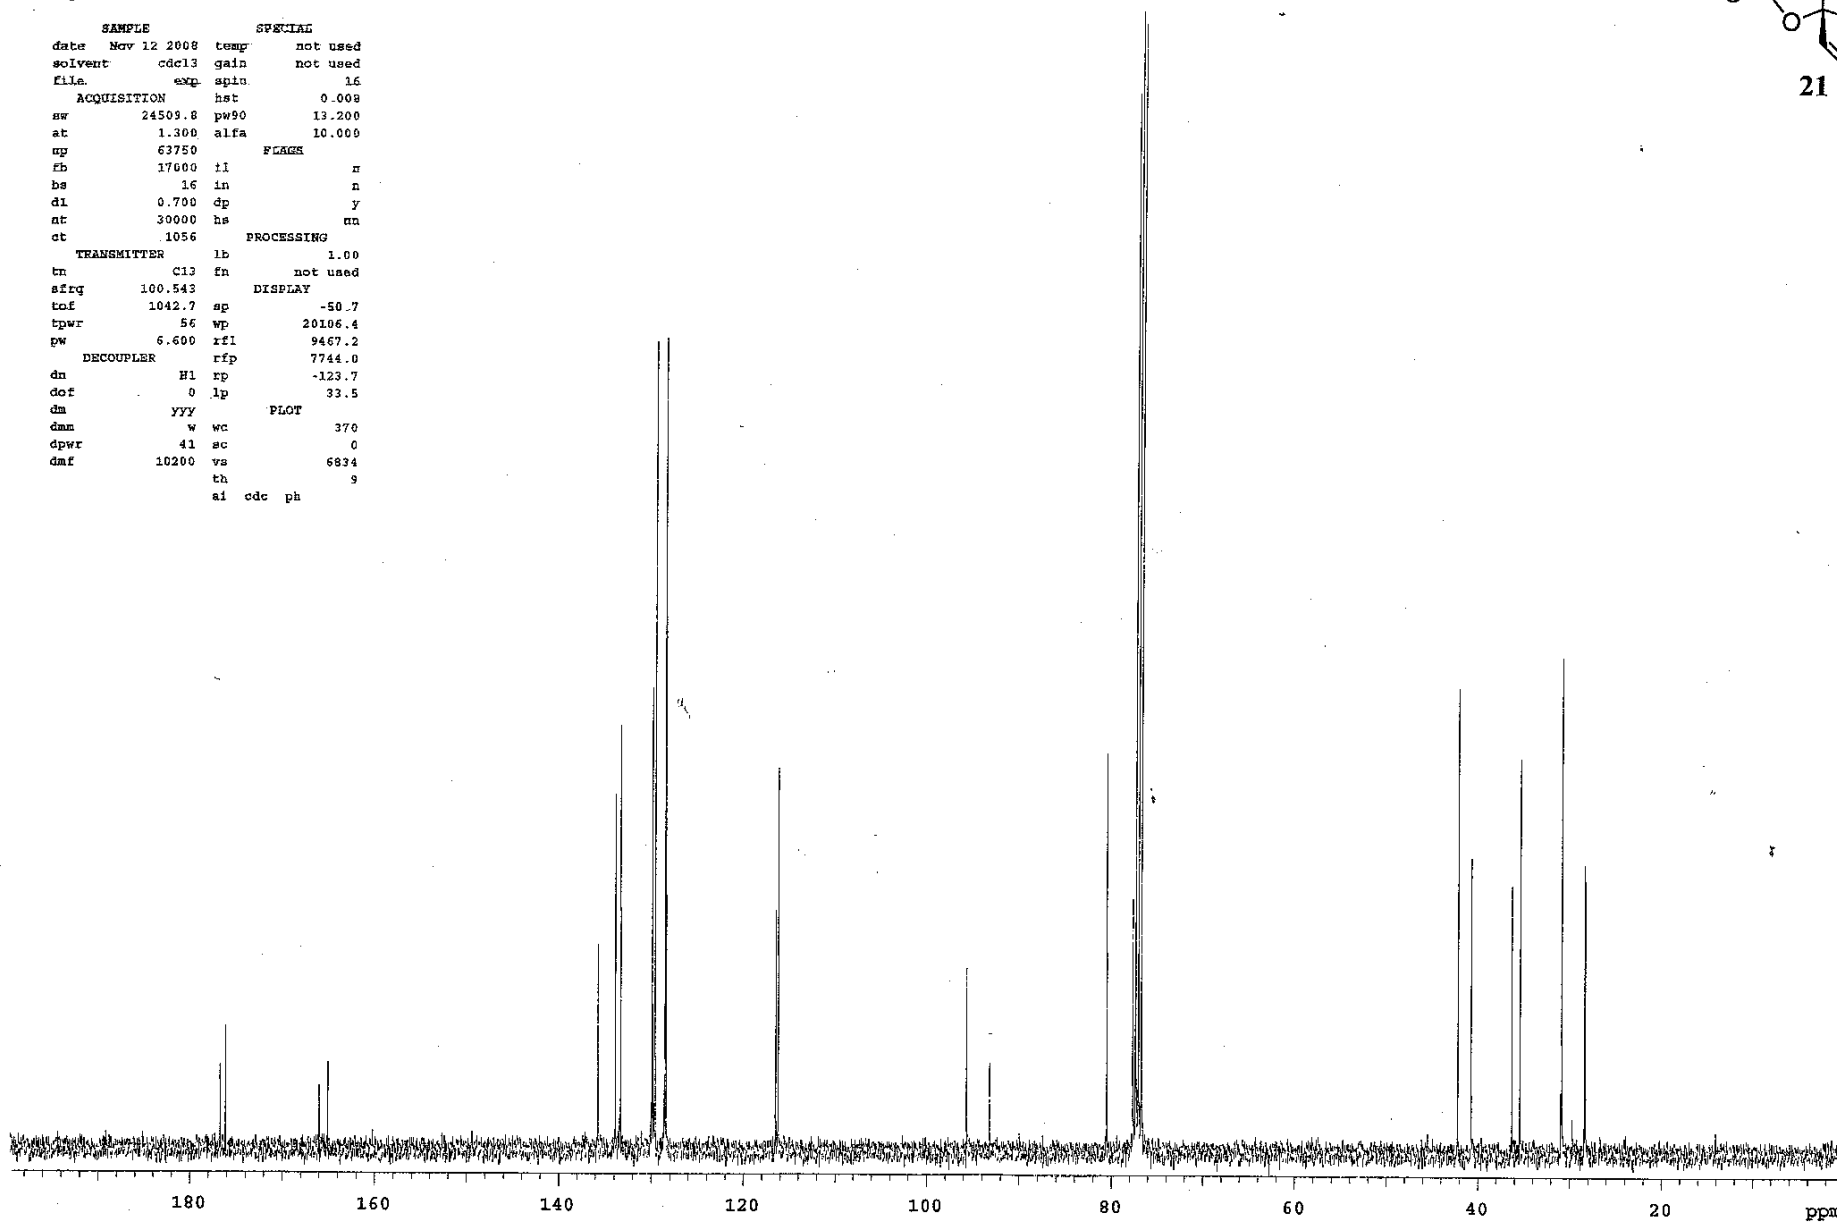

S53

Table 1. Crystal data and structure refinement for p2.

|                                   |                                                                 |                             |
|-----------------------------------|-----------------------------------------------------------------|-----------------------------|
| Identification code               | p2                                                              |                             |
| Empirical formula                 | C <sub>16</sub> H <sub>20</sub> N <sub>2</sub> O <sub>4</sub> S |                             |
| Formula weight                    | 336.40                                                          |                             |
| Temperature                       | 296 K                                                           |                             |
| Wavelength                        | 0.71073 Å                                                       |                             |
| Crystal system                    | Monoclinic                                                      |                             |
| Space group                       | P2(1)/c                                                         |                             |
| Unit cell dimensions              | a = 15.677(5) Å                                                 | $\alpha = 90^\circ$ .       |
|                                   | b = 8.062(3) Å                                                  | $\beta = 99.968(4)^\circ$ . |
|                                   | c = 12.985(4) Å                                                 | $\gamma = 90^\circ$ .       |
| Volume                            | 1616.3(9) Å <sup>3</sup>                                        |                             |
| Z                                 | 4                                                               |                             |
| Density (calculated)              | 1.382 Mg/m <sup>3</sup>                                         |                             |
| Absorption coefficient            | 0.222 mm <sup>-1</sup>                                          |                             |
| F(000)                            | 712                                                             |                             |
| Crystal size                      | 0.43 x 0.25 x 0.23 mm <sup>3</sup>                              |                             |
| Theta range for data collection   | 1.32 to 27.55°.                                                 |                             |
| Index ranges                      | -20 ≤ h ≤ 9, -10 ≤ k ≤ 10, -16 ≤ l ≤ 16                         |                             |
| Reflections collected             | 7922                                                            |                             |
| Independent reflections           | 3654 [R(int) = 0.0632]                                          |                             |
| Completeness to theta = 27.55°    | 97.6 %                                                          |                             |
| Absorption correction             | None                                                            |                             |
| Refinement method                 | Full-matrix least-squares on F <sup>2</sup>                     |                             |
| Data / restraints / parameters    | 3654 / 0 / 211                                                  |                             |
| Goodness-of-fit on F <sup>2</sup> | 1.053                                                           |                             |
| Final R indices [I > 2σ(I)]       | R1 = 0.0875, wR2 = 0.2392                                       |                             |
| R indices (all data)              | R1 = 0.0897, wR2 = 0.2436                                       |                             |
| Extinction coefficient            | 0.002(4)                                                        |                             |
| Largest diff. peak and hole       | 0.932 and -0.872 e.Å <sup>-3</sup>                              |                             |

Table 2. Atomic coordinates (x 10<sup>4</sup>) and equivalent isotropic displacement parameters (Å<sup>2</sup> x 10<sup>3</sup>) for p2. U(eq) is defined as one third of the trace of the orthogonalized U<sup>ij</sup> tensor.

|       | x       | y        | z       | U(eq) |
|-------|---------|----------|---------|-------|
| S(1)  | 2442(1) | 10919(1) | 3056(1) | 17(1) |
| C(2)  | 3985(2) | 5770(3)  | 789(2)  | 24(1) |
| C(3)  | 3350(1) | 6960(3)  | 1215(2) | 18(1) |
| C(4)  | 3041(2) | 6321(3)  | 2199(2) | 23(1) |
| C(5)  | 2502(2) | 7638(3)  | 2602(2) | 20(1) |
| C(6)  | 3849(1) | 8638(2)  | 1451(2) | 15(1) |
| C(7)  | 4808(1) | 8168(3)  | 1459(2) | 20(1) |
| C(8)  | 4734(2) | 6876(3)  | 587(2)  | 25(1) |
| C(9)  | 3583(2) | 9993(3)  | 656(2)  | 23(1) |
| C(10) | 1512(1) | 11258(3) | 2108(2) | 17(1) |
| C(11) | 709(2)  | 10696(3) | 2294(2) | 21(1) |
| C(12) | -26(2)  | 11071(3) | 1565(2) | 24(1) |
| C(13) | 34(2)   | 11997(3) | 669(2)  | 23(1) |
| C(14) | 846(2)  | 12517(3) | 498(2)  | 24(1) |
| C(15) | 1593(2) | 12165(3) | 1219(2) | 21(1) |
| C(16) | -776(2) | 12413(3) | -102(2) | 31(1) |
| O(1)  | 5128(1) | 7430(2)  | 2451(1) | 23(1) |
| O(2)  | 1776(1) | 7476(2)  | 2795(2) | 27(1) |
| N(1)  | 2927(1) | 9172(2)  | 2705(2) | 16(1) |
| N(2)  | 3781(1) | 9313(2)  | 2495(1) | 14(1) |
| O(3)  | 2184(1) | 10601(3) | 4043(1) | 27(1) |

|       |         |          |         |       |
|-------|---------|----------|---------|-------|
| O(4)  | 3061(1) | 12211(2) | 2972(1) | 24(1) |
| C(17) | 2982(2) | 9926(4)  | -184(2) | 37(1) |

Table 3. Bond lengths [Å] and angles [°] for p2.

---

|                   |            |
|-------------------|------------|
| S(1)-O(3)         | 1.4316(18) |
| S(1)-O(4)         | 1.4403(17) |
| S(1)-N(1)         | 1.6995(19) |
| S(1)-C(10)        | 1.759(2)   |
| C(2)-C(8)         | 1.532(4)   |
| C(2)-C(3)         | 1.552(3)   |
| C(3)-C(4)         | 1.532(3)   |
| C(3)-C(6)         | 1.567(3)   |
| C(4)-C(5)         | 1.505(3)   |
| C(5)-O(2)         | 1.215(3)   |
| C(5)-N(1)         | 1.400(3)   |
| C(6)-N(2)         | 1.481(3)   |
| C(6)-C(9)         | 1.511(3)   |
| C(6)-C(7)         | 1.549(3)   |
| C(7)-O(1)         | 1.429(3)   |
| C(7)-C(8)         | 1.528(3)   |
| C(9)-C(17)        | 1.314(4)   |
| C(10)-C(15)       | 1.391(3)   |
| C(10)-C(11)       | 1.397(3)   |
| C(11)-C(12)       | 1.391(3)   |
| C(12)-C(13)       | 1.400(3)   |
| C(13)-C(14)       | 1.393(4)   |
| C(13)-C(16)       | 1.513(3)   |
| C(14)-C(15)       | 1.397(3)   |
| N(1)-N(2)         | 1.417(3)   |
| O(3)-S(1)-O(4)    | 119.72(11) |
| O(3)-S(1)-N(1)    | 107.47(10) |
| O(4)-S(1)-N(1)    | 103.91(10) |
| O(3)-S(1)-C(10)   | 109.03(11) |
| O(4)-S(1)-C(10)   | 108.79(11) |
| N(1)-S(1)-C(10)   | 107.18(10) |
| C(8)-C(2)-C(3)    | 105.02(18) |
| C(4)-C(3)-C(2)    | 113.85(18) |
| C(4)-C(3)-C(6)    | 110.27(17) |
| C(2)-C(3)-C(6)    | 105.90(18) |
| C(5)-C(4)-C(3)    | 109.28(17) |
| O(2)-C(5)-N(1)    | 121.5(2)   |
| O(2)-C(5)-C(4)    | 126.7(2)   |
| N(1)-C(5)-C(4)    | 111.76(19) |
| N(2)-C(6)-C(9)    | 107.74(17) |
| N(2)-C(6)-C(7)    | 107.93(16) |
| C(9)-C(6)-C(7)    | 109.50(17) |
| N(2)-C(6)-C(3)    | 112.57(16) |
| C(9)-C(6)-C(3)    | 114.87(18) |
| C(7)-C(6)-C(3)    | 103.98(16) |
| O(1)-C(7)-C(8)    | 110.75(19) |
| O(1)-C(7)-C(6)    | 107.22(17) |
| C(8)-C(7)-C(6)    | 102.25(17) |
| C(7)-C(8)-C(2)    | 103.45(18) |
| C(17)-C(9)-C(6)   | 127.7(2)   |
| C(15)-C(10)-C(11) | 121.9(2)   |

|                   |            |
|-------------------|------------|
| C(15)-C(10)-S(1)  | 118.63(17) |
| C(11)-C(10)-S(1)  | 119.41(17) |
| C(12)-C(11)-C(10) | 118.5(2)   |
| C(11)-C(12)-C(13) | 121.0(2)   |
| C(14)-C(13)-C(12) | 119.2(2)   |
| C(14)-C(13)-C(16) | 120.9(2)   |
| C(12)-C(13)-C(16) | 119.9(2)   |
| C(13)-C(14)-C(15) | 121.0(2)   |
| C(10)-C(15)-C(14) | 118.5(2)   |
| C(5)-N(1)-N(2)    | 120.11(17) |
| C(5)-N(1)-S(1)    | 122.06(16) |
| N(2)-N(1)-S(1)    | 117.82(14) |
| N(1)-N(2)-C(6)    | 111.50(16) |

Symmetry transformations used to generate equivalent atoms:

Table 4. Anisotropic displacement parameters ( $\text{\AA}^2 \times 10^3$ ) for p2. The anisotropic displacement factor exponent takes the form:  $-2\pi^2 [ h^2 a^2 U^{11} + \dots + 2 h k a^* b^* U^{12} ]$

|       | $U^{11}$ | $U^{22}$ | $U^{33}$ | $U^{23}$ | $U^{13}$ | $U^{12}$ |
|-------|----------|----------|----------|----------|----------|----------|
| S(1)  | 16(1)    | 16(1)    | 20(1)    | -5(1)    | 3(1)     | 2(1)     |
| C(2)  | 22(1)    | 18(1)    | 30(1)    | -11(1)   | 1(1)     | 3(1)     |
| C(3)  | 19(1)    | 12(1)    | 21(1)    | -3(1)    | -1(1)    | 0(1)     |
| C(4)  | 24(1)    | 9(1)     | 36(1)    | 2(1)     | 7(1)     | -1(1)    |
| C(5)  | 20(1)    | 13(1)    | 26(1)    | 5(1)     | 5(1)     | 1(1)     |
| C(6)  | 17(1)    | 12(1)    | 16(1)    | -1(1)    | 4(1)     | 0(1)     |
| C(7)  | 17(1)    | 19(1)    | 23(1)    | -5(1)    | 5(1)     | 0(1)     |
| C(8)  | 24(1)    | 26(1)    | 26(1)    | -9(1)    | 6(1)     | 5(1)     |
| C(9)  | 30(1)    | 16(1)    | 26(1)    | 6(1)     | 10(1)    | 4(1)     |
| C(10) | 15(1)    | 14(1)    | 20(1)    | -3(1)    | 1(1)     | 3(1)     |
| C(11) | 19(1)    | 21(1)    | 22(1)    | -1(1)    | 6(1)     | 2(1)     |
| C(12) | 17(1)    | 27(1)    | 27(1)    | -2(1)    | 4(1)     | 4(1)     |
| C(13) | 23(1)    | 17(1)    | 27(1)    | -4(1)    | 1(1)     | 7(1)     |
| C(14) | 28(1)    | 19(1)    | 25(1)    | 3(1)     | 6(1)     | 5(1)     |
| C(15) | 22(1)    | 14(1)    | 28(1)    | -1(1)    | 7(1)     | 1(1)     |
| C(16) | 26(1)    | 33(1)    | 30(1)    | -3(1)    | -4(1)    | 10(1)    |
| O(1)  | 18(1)    | 24(1)    | 26(1)    | -4(1)    | 0(1)     | 9(1)     |
| O(2)  | 22(1)    | 19(1)    | 42(1)    | 5(1)     | 11(1)    | -3(1)    |
| N(1)  | 16(1)    | 12(1)    | 22(1)    | 1(1)     | 6(1)     | 0(1)     |
| N(2)  | 12(1)    | 15(1)    | 17(1)    | -2(1)    | 3(1)     | 0(1)     |
| O(3)  | 23(1)    | 39(1)    | 19(1)    | -5(1)    | 4(1)     | 8(1)     |
| O(4)  | 18(1)    | 16(1)    | 38(1)    | -10(1)   | 3(1)     | 0(1)     |
| C(17) | 48(2)    | 39(2)    | 24(1)    | 14(1)    | 4(1)     | 6(1)     |

Table 5. Hydrogen coordinates ( $\times 10^4$ ) and isotropic displacement parameters ( $\text{\AA}^2 \times 10^3$ ) for p2.

|       | x    | y    | z    | U(eq) |
|-------|------|------|------|-------|
| H(2)  | 4191 | 4917 | 1298 | 29    |
| H(2B) | 3705 | 5243 | 147  | 29    |
| H(3)  | 2844 | 7146 | 667  | 21    |
| H(4A) | 2698 | 5323 | 2035 | 27    |
| H(4B) | 3536 | 6050 | 2730 | 27    |



|        |       |       |      |    |
|--------|-------|-------|------|----|
| H(7)   | 5156  | 9127  | 1319 | 24 |
| H(8A)  | 5265  | 6243  | 631  | 30 |
| H(8B)  | 4602  | 7396  | -96  | 30 |
| H(9)   | 3880  | 10992 | 776  | 28 |
| H(11)  | 667   | 10085 | 2890 | 25 |
| H(12)  | -564  | 10702 | 1676 | 28 |
| H(14)  | 890   | 13107 | -106 | 29 |
| H(15)  | 2133  | 12529 | 1108 | 25 |
| H(16A) | -1073 | 11408 | -344 | 46 |
| H(16B) | -621  | 13002 | -685 | 46 |
| H(16C) | -1149 | 13094 | 234  | 46 |
| H(1)   | 5572  | 6911  | 2417 | 35 |
| H(2A)  | 4207  | 9737  | 2920 | 17 |
| H(17A) | 2663  | 8958  | -344 | 45 |
| H(17B) | 2874  | 10846 | -619 | 45 |

---

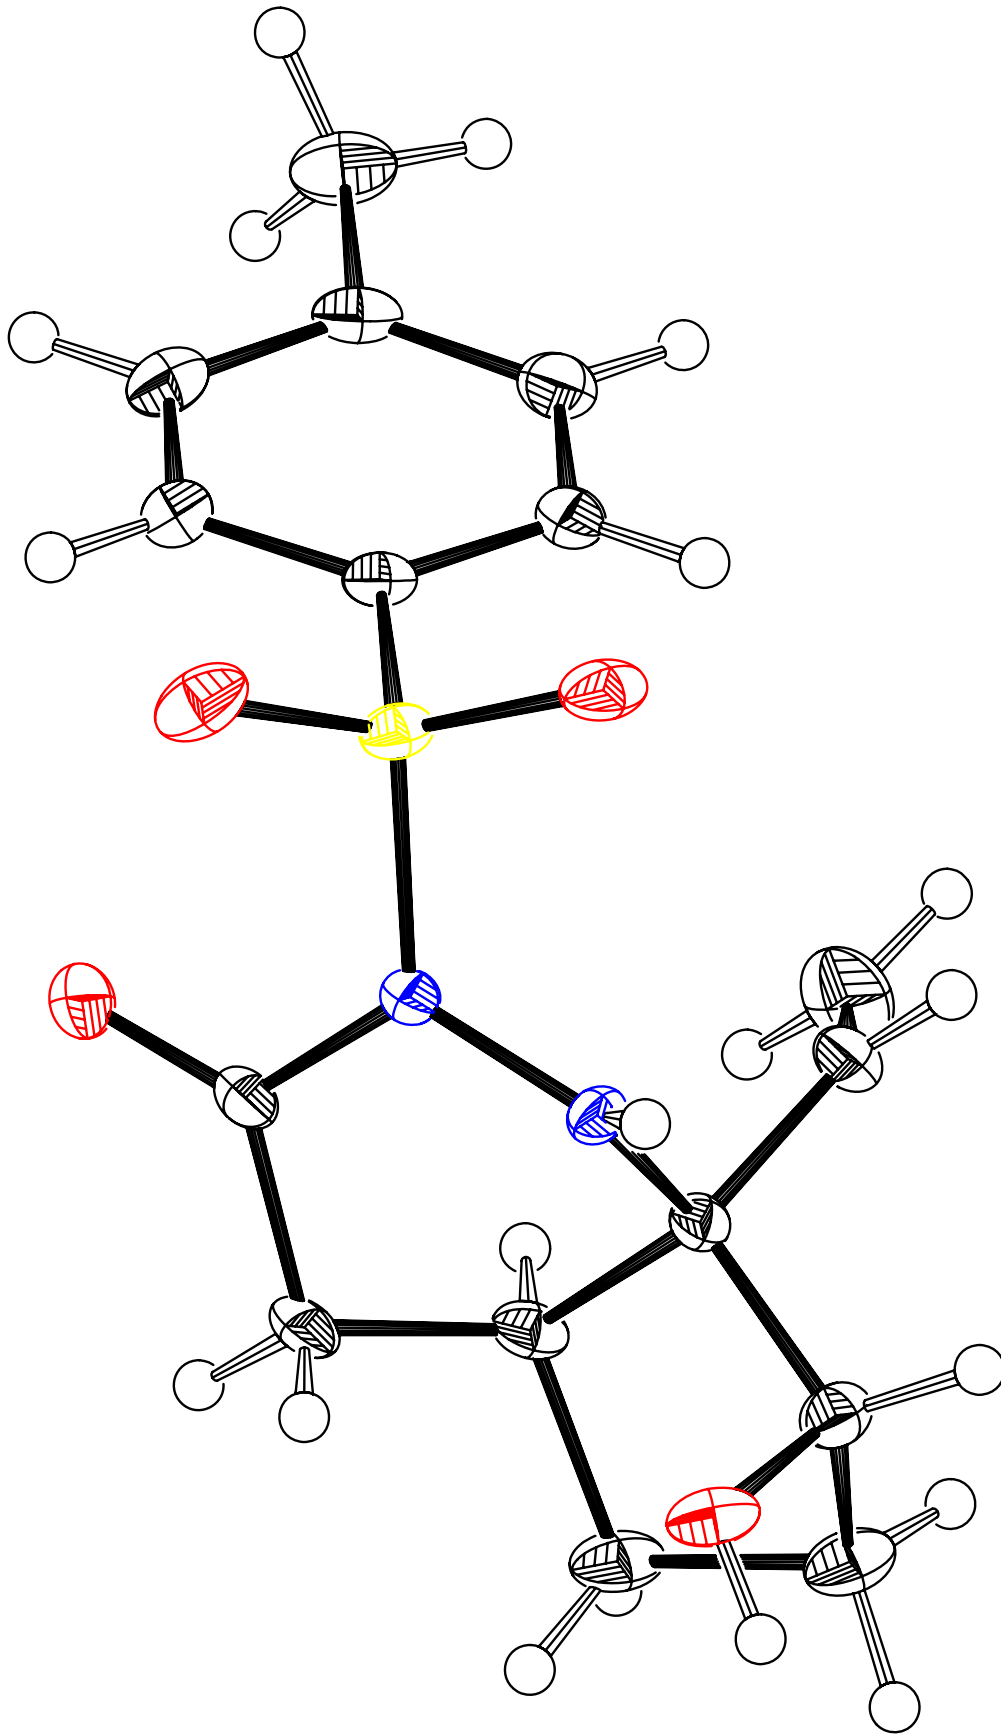

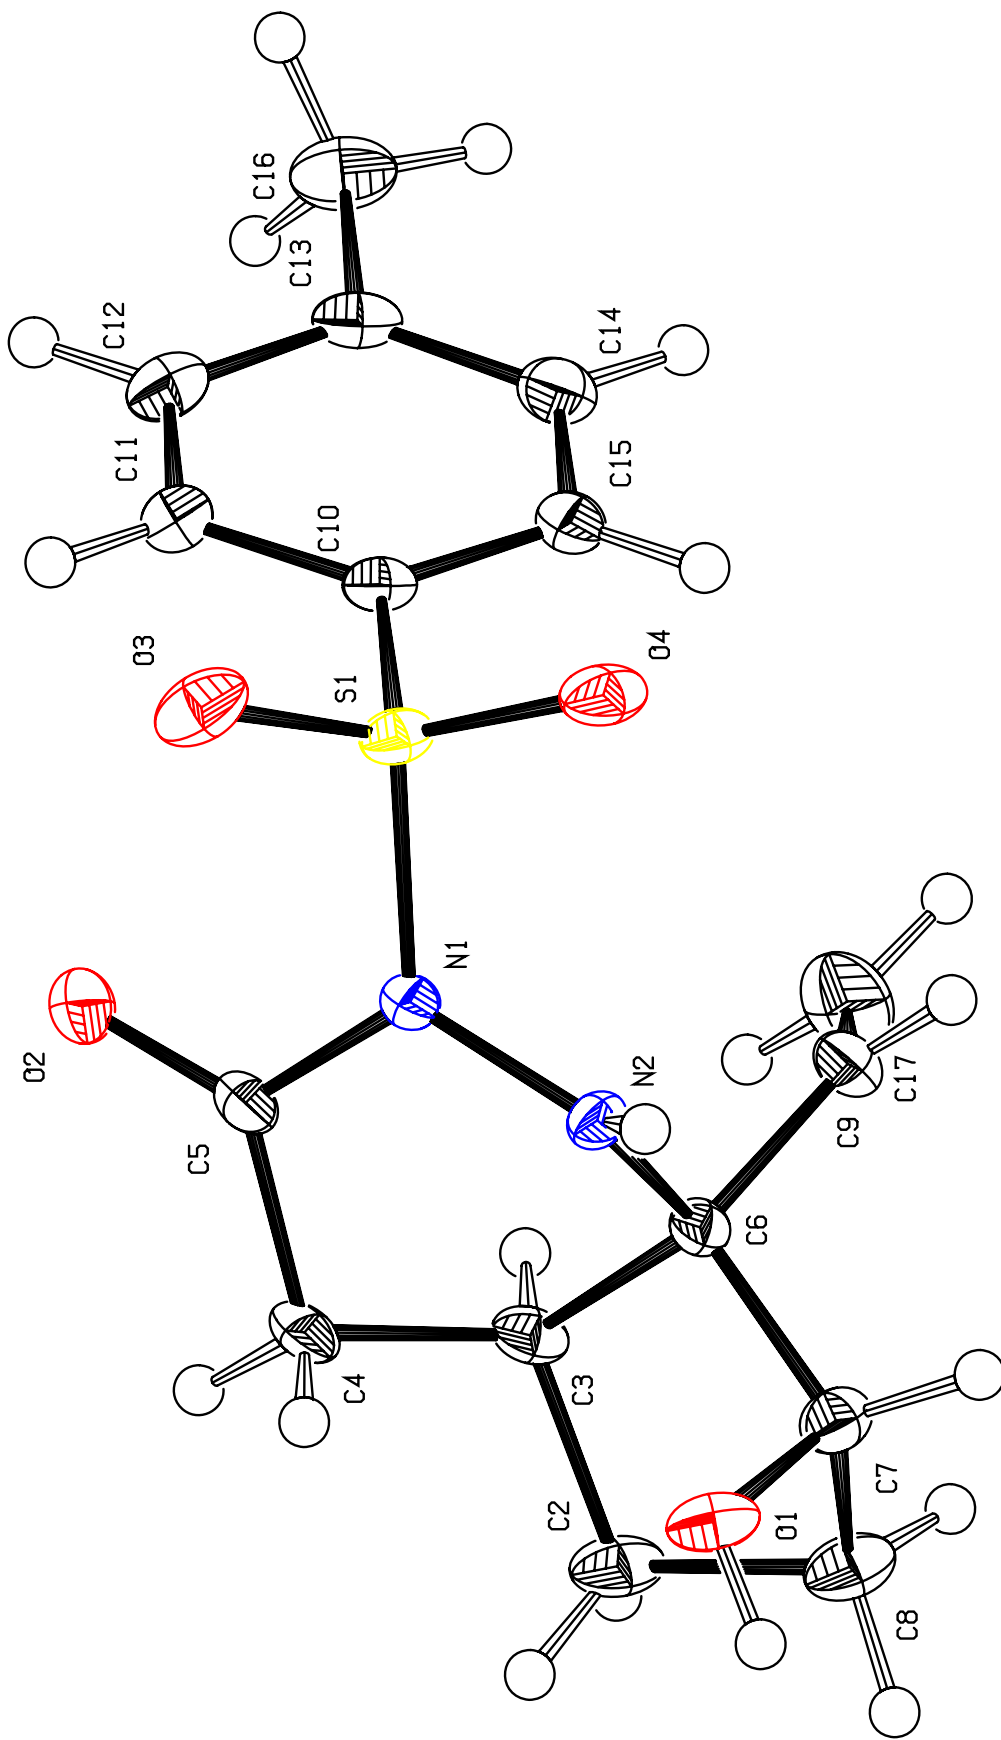

Table 1. Crystal data and structure refinement for **Kpa403**.

|                                   |                                                                 |                     |
|-----------------------------------|-----------------------------------------------------------------|---------------------|
| Identification code               | <b>Kpa403</b>                                                   |                     |
| Empirical formula                 | C <sub>18</sub> H <sub>22</sub> N <sub>6</sub> O <sub>6</sub> S |                     |
| Formula weight                    | 450.48                                                          |                     |
| Temperature                       | 296 K                                                           |                     |
| Wavelength                        | 0.71073                                                         |                     |
| Crystal system                    | Monoclinic                                                      |                     |
| Space group                       | P2(1)/c                                                         |                     |
| Unit cell dimensions              | a = 13.493(7)                                                   | $\alpha$ = 90       |
|                                   | b = 16.902(9)                                                   | $\beta$ = 96.042(7) |
|                                   | c = 9.145(5)                                                    | $\gamma$ = 90       |
| Volume                            | 2074.0(18)                                                      |                     |
| Z                                 | 4                                                               |                     |
| Density (calculated)              | 1.443 Mg/m <sup>3</sup>                                         |                     |
| Absorption coefficient            | 0.205 mm <sup>-1</sup>                                          |                     |
| F(000)                            | 944                                                             |                     |
| Crystal size                      | ? x ? x ? mm <sup>3</sup>                                       |                     |
| Theta range for data collection   | 1.52 to 27.78                                                   |                     |
| Index ranges                      | -17<=h<=12, -21<=k<=21, -11<=l<=11                              |                     |
| Reflections collected             | 11416                                                           |                     |
| Independent reflections           | 4748 [R(int) = 0.0735]                                          |                     |
| Completeness to theta = 27.78     | 96.9 %                                                          |                     |
| Absorption correction             | Empirical                                                       |                     |
| Refinement method                 | Full-matrix least-squares on F <sup>2</sup>                     |                     |
| Data / restraints / parameters    | 4748 / 0 / 287                                                  |                     |
| Goodness-of-fit on F <sup>2</sup> | 1.014                                                           |                     |
| Final R indices [I>2sigma(I)]     | R1 = 0.0660, wR2 = 0.1686                                       |                     |
| R indices (all data)              | R1 = 0.0894, wR2 = 0.1858                                       |                     |
| Extinction coefficient            | 0.0000(13)                                                      |                     |
| Largest diff. peak and hole       | 0.581 and -0.397 e                                              |                     |

Table 2. Atomic coordinates ( $\times 10^4$ ) and equivalent isotropic displacement parameters ( $\text{\AA}^2 \times 10^3$ ) for p21.  $U(\text{eq})$  is defined as one third of the trace of the orthogonalized  $U^{ij}$  tensor.

|       | x        | y       | z        | $U(\text{eq})$ |
|-------|----------|---------|----------|----------------|
| S(1)  | -1077(1) | 1757(1) | 3146(1)  | 27(1)          |
| C(5)  | 1499(2)  | 532(1)  | 236(2)   | 26(1)          |
| C(6)  | 2617(2)  | 685(2)  | 277(2)   | 30(1)          |
| C(1)  | 502(2)   | 2587(1) | 2303(2)  | 26(1)          |
| C(7)  | 2723(2)  | 1575(2) | 635(2)   | 29(1)          |
| C(2)  | 1396(2)  | 2527(1) | 1457(2)  | 28(1)          |
| C(3)  | 1938(2)  | 1735(1) | 1717(2)  | 28(1)          |
| C(4)  | 1189(2)  | 1027(1) | 1556(2)  | 26(1)          |
| C(8)  | 3787(2)  | 1793(2) | 1233(3)  | 38(1)          |
| C(9)  | 1168(2)  | 511(2)  | 2909(2)  | 31(1)          |
| C(10) | 1761(2)  | 546(2)  | 4151(3)  | 42(1)          |
| C(11) | 3033(2)  | 428(2)  | -1133(3) | 34(1)          |
| C(12) | -2014(2) | 2331(2) | 2174(2)  | 27(1)          |
| C(13) | -2072(2) | 3139(2) | 2449(2)  | 31(1)          |
| C(14) | -2766(2) | 3586(2) | 1594(3)  | 35(1)          |
| C(15) | -3405(2) | 3242(2) | 465(3)   | 36(1)          |
| C(16) | -3347(2) | 2430(2) | 237(3)   | 37(1)          |
| C(17) | -2656(2) | 1965(2) | 1079(2)  | 31(1)          |
| C(18) | -4104(3) | 3748(2) | -532(3)  | 50(1)          |
| O(1)  | -1317(1) | 940(1)  | 2977(2)  | 34(1)          |
| O(2)  | -813(1)  | 2094(1) | 4567(2)  | 35(1)          |
| O(3)  | 1301(2)  | -285(1) | 354(2)   | 32(1)          |
| O(4)  | 4279(3)  | 2863(2) | 2739(3)  | 81(1)          |
| O(5)  | 3560(2)  | 3133(1) | 614(3)   | 59(1)          |
| N(1)  | -65(2)   | 1899(1) | 2215(2)  | 24(1)          |
| N(2)  | 149(2)   | 1314(1) | 1171(2)  | 24(1)          |
| N(3)  | 3888(2)  | 2661(2) | 1559(3)  | 42(1)          |
| N(4)  | 4129(2)  | 373(2)  | -789(3)  | 57(1)          |
| N(5)  | 4632(2)  | 289(1)  | -1805(2) | 40(1)          |
| N(6)  | 5205(2)  | 216(2)  | -2619(3) | 56(1)          |
| O(6)  | 314(2)   | 3162(1) | 3039(2)  | 32(1)          |

Table 3. Bond lengths [Å] and angles [°] for p21.

|                |            |
|----------------|------------|
| S(1)–O(1)      | 1.423(2)   |
| S(1)–O(2)      | 1.4292(17) |
| S(1)–N(1)      | 1.700(2)   |
| S(1)–C(12)     | 1.759(3)   |
| C(5)–O(3)      | 1.412(3)   |
| C(5)–C(6)      | 1.528(4)   |
| C(5)–C(4)      | 1.561(3)   |
| C(6)–C(11)     | 1.522(3)   |
| C(6)–C(7)      | 1.543(3)   |
| C(1)–O(6)      | 1.223(3)   |
| C(1)–N(1)      | 1.389(3)   |
| C(1)–C(2)      | 1.504(3)   |
| C(7)–C(8)      | 1.528(4)   |
| C(7)–C(3)      | 1.547(3)   |
| C(2)–C(3)      | 1.533(3)   |
| C(3)–C(4)      | 1.564(4)   |
| C(4)–N(2)      | 1.491(3)   |
| C(4)–C(9)      | 1.516(3)   |
| C(8)–N(3)      | 1.500(4)   |
| C(9)–C(10)     | 1.320(4)   |
| C(11)–N(4)     | 1.482(4)   |
| C(12)–C(13)    | 1.393(4)   |
| C(12)–C(17)    | 1.398(3)   |
| C(13)–C(14)    | 1.380(4)   |
| C(14)–C(15)    | 1.400(4)   |
| C(15)–C(16)    | 1.392(4)   |
| C(15)–C(18)    | 1.507(4)   |
| C(16)–C(17)    | 1.388(4)   |
| O(4)–N(3)      | 1.200(3)   |
| O(5)–N(3)      | 1.225(3)   |
| N(1)–N(2)      | 1.426(3)   |
| N(4)–N(5)      | 1.214(3)   |
| N(5)–N(6)      | 1.135(3)   |
| O(1)–S(1)–O(2) | 121.13(10) |
| O(1)–S(1)–N(1) | 105.57(10) |

|                   |            |
|-------------------|------------|
| O(2)-S(1)-N(1)    | 105.22(11) |
| O(1)-S(1)-C(12)   | 109.68(12) |
| O(2)-S(1)-C(12)   | 109.72(11) |
| N(1)-S(1)-C(12)   | 103.99(11) |
| O(3)-C(5)-C(6)    | 111.0(2)   |
| O(3)-C(5)-C(4)    | 113.37(18) |
| C(6)-C(5)-C(4)    | 103.57(19) |
| C(5)-C(6)-C(11)   | 112.5(2)   |
| C(5)-C(6)-C(7)    | 103.8(2)   |
| C(11)-C(6)-C(7)   | 115.0(2)   |
| O(6)-C(1)-N(1)    | 123.5(2)   |
| O(6)-C(1)-C(2)    | 124.0(2)   |
| N(1)-C(1)-C(2)    | 112.4(2)   |
| C(8)-C(7)-C(6)    | 111.9(2)   |
| C(8)-C(7)-C(3)    | 114.2(2)   |
| C(6)-C(7)-C(3)    | 104.63(19) |
| C(1)-C(2)-C(3)    | 111.98(19) |
| C(2)-C(3)-C(7)    | 113.65(19) |
| C(2)-C(3)-C(4)    | 111.2(2)   |
| C(7)-C(3)-C(4)    | 106.50(19) |
| N(2)-C(4)-C(9)    | 106.31(19) |
| N(2)-C(4)-C(5)    | 108.25(18) |
| C(9)-C(4)-C(5)    | 110.66(19) |
| N(2)-C(4)-C(3)    | 110.87(19) |
| C(9)-C(4)-C(3)    | 115.50(19) |
| C(5)-C(4)-C(3)    | 105.11(19) |
| N(3)-C(8)-C(7)    | 111.7(2)   |
| C(10)-C(9)-C(4)   | 128.0(3)   |
| N(4)-C(11)-C(6)   | 106.7(2)   |
| C(13)-C(12)-C(17) | 121.4(2)   |
| C(13)-C(12)-S(1)  | 120.07(19) |
| C(17)-C(12)-S(1)  | 118.47(19) |
| C(14)-C(13)-C(12) | 118.8(2)   |
| C(13)-C(14)-C(15) | 121.3(3)   |
| C(16)-C(15)-C(14) | 118.7(3)   |
| C(16)-C(15)-C(18) | 120.7(3)   |
| C(14)-C(15)-C(18) | 120.5(3)   |
| C(17)-C(16)-C(15) | 121.3(3)   |

|                   |            |
|-------------------|------------|
| C(16)-C(17)-C(12) | 118.5(2)   |
| C(1)-N(1)-N(2)    | 118.08(19) |
| C(1)-N(1)-S(1)    | 123.73(16) |
| N(2)-N(1)-S(1)    | 117.85(16) |
| N(1)-N(2)-C(4)    | 108.61(18) |
| O(4)-N(3)-O(5)    | 122.8(3)   |
| O(4)-N(3)-C(8)    | 118.6(3)   |
| O(5)-N(3)-C(8)    | 118.6(2)   |
| N(5)-N(4)-C(11)   | 118.1(3)   |
| N(6)-N(5)-N(4)    | 171.1(3)   |

---

Symmetry transformations used to generate equivalent atoms:



**Table 4. Anisotropic displacement parameters ( $\text{\AA}^2 \times 10^3$ ) for p21. The anisotropic displacement factor exponent takes the form:  $-2\pi^2 [ h^2 a^{*2} U^{11} + \dots + 2 h k a^* b^* U^{12} ]$**

|       | U <sup>11</sup> | U <sup>22</sup> | U <sup>33</sup> | U <sup>23</sup> | U <sup>13</sup> | U <sup>12</sup> |
|-------|-----------------|-----------------|-----------------|-----------------|-----------------|-----------------|
| S(1)  | 28(1)           | 41(1)           | 14(1)           | 1(1)            | 6(1)            | 0(1)            |
| C(5)  | 28(1)           | 34(1)           | 18(1)           | 0(1)            | 4(1)            | 2(1)            |
| C(6)  | 28(2)           | 38(1)           | 24(1)           | 2(1)            | 4(1)            | 3(1)            |
| C(1)  | 28(1)           | 36(1)           | 14(1)           | -1(1)           | 1(1)            | -1(1)           |
| C(7)  | 26(1)           | 40(1)           | 22(1)           | 2(1)            | 6(1)            | 1(1)            |
| C(2)  | 28(1)           | 35(1)           | 20(1)           | -3(1)           | 5(1)            | -4(1)           |
| C(3)  | 28(2)           | 41(1)           | 15(1)           | -1(1)           | 1(1)            | 0(1)            |
| C(4)  | 26(1)           | 36(1)           | 16(1)           | 2(1)            | 4(1)            | 2(1)            |
| C(8)  | 28(2)           | 46(2)           | 41(2)           | -1(1)           | 4(1)            | 2(1)            |
| C(9)  | 35(2)           | 38(1)           | 20(1)           | 4(1)            | 5(1)            | 2(1)            |
| C(10) | 56(2)           | 48(2)           | 21(1)           | 6(1)            | -2(1)           | -5(1)           |
| C(11) | 30(2)           | 44(2)           | 29(1)           | 1(1)            | 8(1)            | 4(1)            |
| C(12) | 24(1)           | 42(1)           | 15(1)           | 2(1)            | 6(1)            | 0(1)            |
| C(13) | 28(2)           | 46(2)           | 20(1)           | -4(1)           | 7(1)            | -2(1)           |
| C(14) | 34(2)           | 42(2)           | 31(1)           | -1(1)           | 12(1)           | 5(1)            |
| C(15) | 28(2)           | 56(2)           | 24(1)           | 3(1)            | 8(1)            | 5(1)            |
| C(16) | 28(2)           | 60(2)           | 23(1)           | -2(1)           | 2(1)            | 0(1)            |
| C(17) | 27(2)           | 43(1)           | 23(1)           | -2(1)           | 7(1)            | -2(1)           |
| C(18) | 43(2)           | 73(2)           | 34(2)           | 6(1)            | 1(1)            | 16(2)           |
| O(1)  | 35(1)           | 43(1)           | 24(1)           | 4(1)            | 9(1)            | -1(1)           |
| O(2)  | 32(1)           | 60(1)           | 13(1)           | -1(1)           | 7(1)            | 1(1)            |
| O(3)  | 37(1)           | 38(1)           | 22(1)           | 0(1)            | 1(1)            | -2(1)           |
| O(4)  | 112(3)          | 72(2)           | 54(2)           | -16(1)          | -9(2)           | -11(2)          |
| O(5)  | 42(2)           | 51(1)           | 80(2)           | 9(1)            | -6(1)           | -4(1)           |
| N(1)  | 23(1)           | 36(1)           | 15(1)           | -2(1)           | 7(1)            | 1(1)            |
| N(2)  | 27(1)           | 33(1)           | 13(1)           | -1(1)           | 4(1)            | 2(1)            |
| N(3)  | 29(1)           | 52(2)           | 46(1)           | -5(1)           | 9(1)            | -4(1)           |
| N(4)  | 36(2)           | 103(2)          | 33(1)           | 5(1)            | 11(1)           | 21(2)           |
| N(5)  | 37(2)           | 53(2)           | 32(1)           | -1(1)           | 6(1)            | 4(1)            |
| N(6)  | 39(2)           | 89(2)           | 41(1)           | -1(1)           | 14(1)           | 1(2)            |
| O(6)  | 36(1)           | 41(1)           | 19(1)           | -6(1)           | 7(1)            | -2(1)           |

Table 5. Hydrogen coordinates ( $\times 10^4$ ) and isotropic displacement parameters ( $\text{\AA}^2 \times 10^3$ ) for p21.

|        | x      | y        | z       | U(eq) |
|--------|--------|----------|---------|-------|
| H(5)   | 1157   | 737      | -685    | 32    |
| H(6)   | 2959   | 385      | 1098    | 36    |
| H(7)   | 2540   | 1877     | -268    | 35    |
| H(2A)  | 1853   | 2955     | 1750    | 33    |
| H(2B)  | 1185   | 2587     | 416     | 33    |
| H(3)   | 2276   | 1732     | 2720    | 34    |
| H(8A)  | 3977   | 1495     | 2125    | 46    |
| H(8B)  | 4238   | 1649     | 517     | 46    |
| H(9)   | 676    | 124      | 2858    | 37    |
| H(10A) | 2266   | 922      | 4268    | 50    |
| H(10B) | 1673   | 194      | 4909    | 50    |
| H(11A) | 2760   | -81      | -1456   | 41    |
| H(11B) | 2865   | 812      | -1907   | 41    |
| H(13)  | -1651  | 3374     | 3196    | 37    |
| H(14)  | -2811  | 4126     | 1771    | 42    |
| H(16)  | -3780  | 2194     | -493    | 44    |
| H(17)  | -2621  | 1423     | 918     | 37    |
| H(18A) | -4021  | 3630     | -1539   | 75    |
| H(18B) | -3956  | 4297     | -340    | 75    |
| H(18C) | -4779  | 3641     | -352    | 75    |
| H(3A)  | 942    | -431     | -376    | 48    |
| H(3)   | 80(30) | 1576(17) | 300(40) | 46(9) |

Table 6. Torsion angles [°] for p21.

---

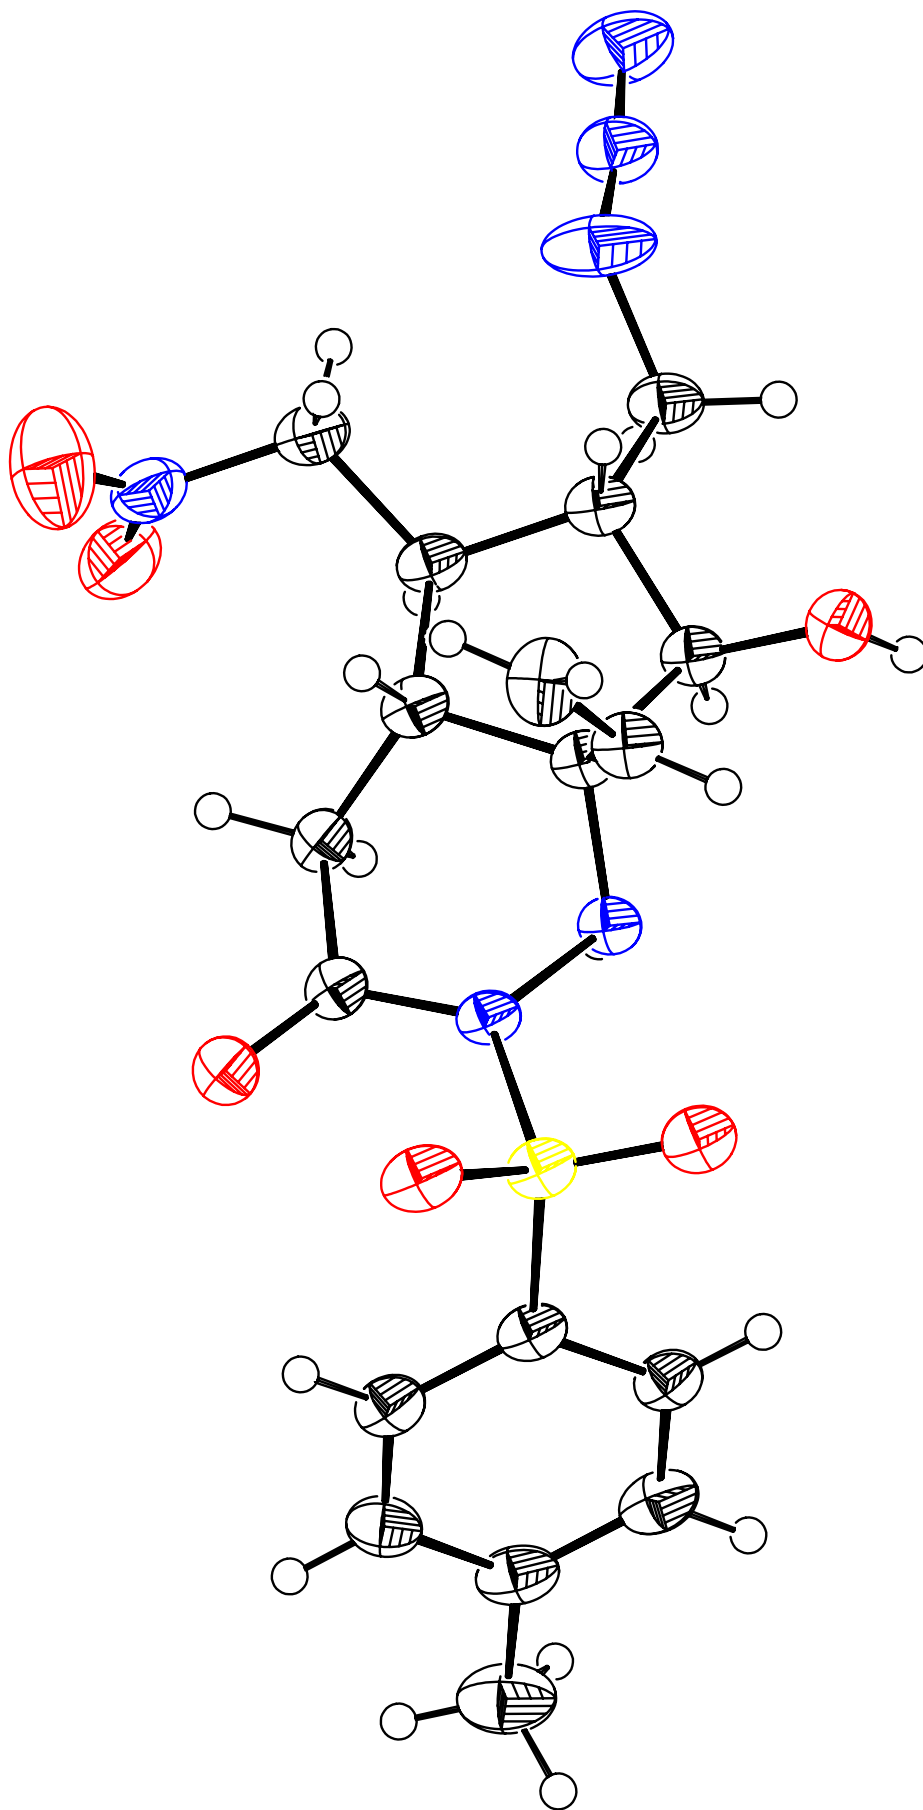

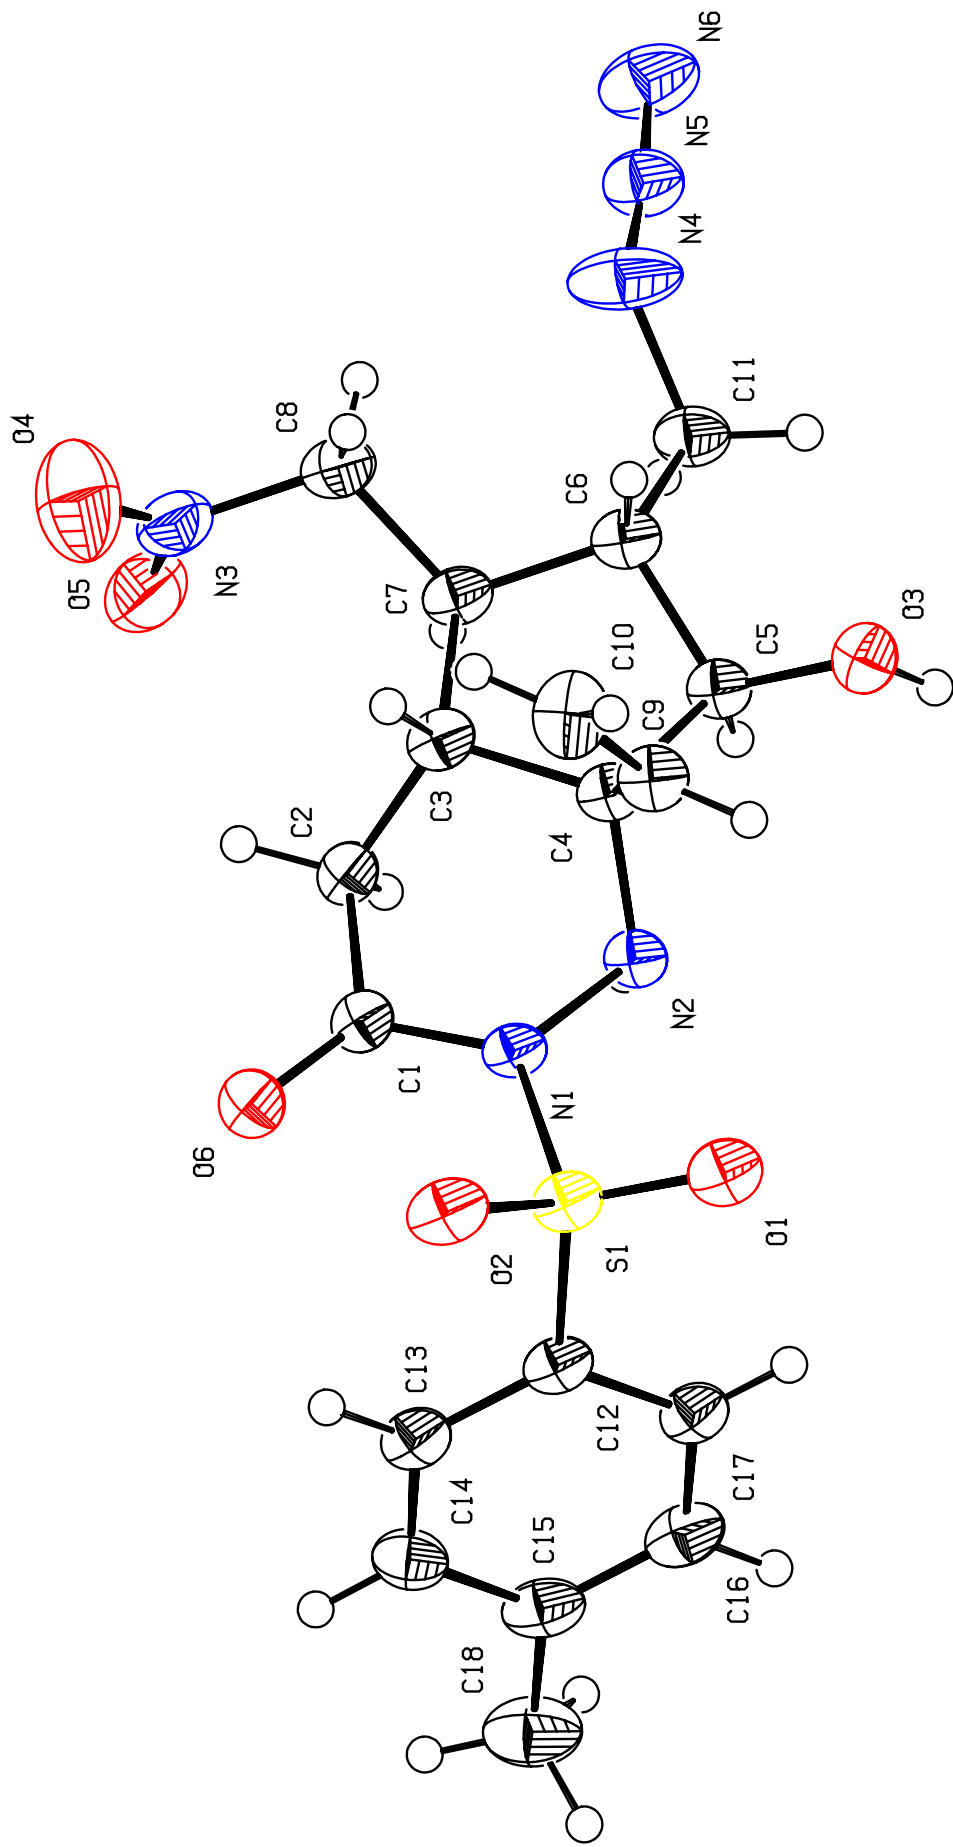

Supplement: NIHMS178103-supplement-pdf.pdf [file NIHMS178103-supplement-pdf.pdf]
